# Supplementary material for: A novel immune-related microRNA signature for prognosis of thymoma
Source: Aging (Albany NY). 2022 Jun 7;14(11):4739–54. doi: 10.18632/aging.204108 (PMC9217705; doi:10.18632/aging.204108)
Supplement: Supplementary Table 2 [file aging-14-204108-s002.xlsx]

## Sheet: Sheet1
Supplementary Table 2. Univariate Cox regression of immune cells for PFI in TCGA thymoma dataset.
Method	Cell population	coef	exp(coef)	se(coef)	z	Pr(>z)	Lower.95% HR	Upper.95% HR	adj.p
EPIC	Bcells	9.82070053120012	18410.9436650573	4.96971518060563	1.97610932906689	0.0481423960554997	1.08354466473744	312827756.592802	0.216640782249749
EPIC	CAFs	-0.408701920239495	0.664512280465093	2.00098396816682	-0.204250472138426	0.838157771528896	0.0131601963696745	33.5539499932128	0.887461169854126
EPIC	CD4_Tcells	2.73917243590343	15.4741739252738	2.50276309158523	1.0944593378067	0.273753571708313	0.114617694375272	2089.11948521348	0.540522094550152
EPIC	CD8_Tcells	-1.51510214675231	0.219785733302244	1.00397187580251	-1.50910815658181	0.131271145476987	0.0307197083422123	1.57246833287241	0.347094124079756
EPIC	Endothelial	2.21867779904812	9.19516496889979	7.76510597326719	0.285724084988193	0.775089456222165	2.25886011753168E-06	37430852.0253451	0.871975638249936
EPIC	Macrophages	90.0762431243685	1.31708965761546E+39	35.5751017390858	2.53200240395668	0.0113413213700239	688705956.521281	2.51881829940875E+69	0.204143784660431
EPIC	NKcells	-6524845.83117234	0	18349167.9376143	-0.355593553525494	0.722144972056896	0	Inf	0.866573966468275
EPIC	otherCells	1.36478167891981	3.91486826041917	1.14438558523353	1.19258901591398	0.233030369734158	0.415541474006429	36.8824640983978	0.524318331901856
MCPcounter	T_cells	-0.0639928342744155	0.938011721041235	0.153140971462065	-0.417868801950673	0.676043043706324	0.69479139962265	1.26637432370148	0.866573966468275
MCPcounter	CD8_T_cells	-0.139341469994662	0.869930922427303	0.0781712411133948	-1.7825157693548	0.0746651619874834	0.746354726424995	1.01396800073895	0.26879458315494
MCPcounter	Cytotoxic_lymphocytes	0.236018313075876	1.26619749792541	0.275975600114215	0.855214421050981	0.392432454065612	0.737208941867559	2.17476486339283	0.642162197561911
MCPcounter	NK_cells	0.315022686690734	1.37029039795884	0.210753487326808	1.4947448352408	0.134981048253239	0.906606692898898	2.07112498666231	0.347094124079756
MCPcounter	B_lineage	0.00146820531675876	1.00146928365786	0.152635346252278	0.00961903879283695	0.992325235810034	0.742530318527316	1.35070676723256	0.992325235810034
MCPcounter	Monocytic_lineage	0.570469256350783	1.76909701669551	0.268989450882893	2.12078672408288	0.0339397544156072	1.0442089576087	2.9972011173397	0.216640782249749
MCPcounter	Myeloid_dendritic_cells	-0.177665649388135	0.837222302486407	0.087025553023397	-2.04153427603464	0.0411977505286626	0.705934657386819	0.992926436527904	0.216640782249749
MCPcounter	Neutrophils	0.209021489431449	1.23247148335714	0.425086403476421	0.491715302399793	0.622920618964672	0.53572594157662	2.83537876254083	0.866573966468275
MCPcounter	Endothelial_cells	-0.403466804594211	0.668000200968685	0.389517563868573	-1.03581158340358	0.300290052527862	0.3113283297173	1.43329156360231	0.540522094550152
MCPcounter	Fibroblasts	0.073041955641872	1.07577567082667	0.179414077051829	0.407113849939275	0.683924371580304	0.756840177720712	1.52911186272886	0.866573966468275
