# Supplementary material for: A novel immune-related microRNA signature for prognosis of thymoma
Source: Aging (Albany NY). 2022 Jun 7;14(11):4739–54. doi: 10.18632/aging.204108 (PMC9217705; doi:10.18632/aging.204108)
Supplement: Supplementary Table 3 [file aging-14-204108-s003.xlsx]

## Sheet: miR interacted with M
Supplementary Table 3. The microRNAs and genes with significant interaction with M2 macrophage.
	coef_Ms	p_Ms	coef_miR	p_miR	z_interaction	p_interaction	p_likelihood	adj.p
hsa-miR-891a-5p	3.04756	2.80436e-05	0.292268	0.00277996	-3.02549	0.0024823	0.00705327	0.106583
hsa-miR-218-5p	12.8414	0.00159282	1.25453	0.0195146	-2.93315	0.00335545	0.0138969	0.145383
hsa-miR-130b-5p	6.09568	0.000868077	0.635781	0.0199786	-2.79257	0.00522913	0.0079056	0.111224
hsa-miR-423-3p	23.4528	0.00365113	2.74203	0.00401545	-2.76984	0.00560832	0.0185791	0.171154
hsa-miR-1307-5p	9.70216	0.0014705	1.99121	1.01067e-05	-2.74195	0.00610759	2.74479e-05	0.0111987
hsa-miR-874-3p	9.18187	0.00277455	1.37022	0.0190723	-2.70381	0.00685501	0.0306635	0.230369
hsa-miR-1307-3p	11.2103	0.00479697	2.3804	5.47818e-05	-2.46994	0.0135134	0.000221121	0.0390161
hsa-miR-425-5p	5.92331	0.00380602	1.6777	0.00204967	-2.43717	0.0148028	0.00276469	0.0936026
hsa-miR-181b-3p	3.75862	0.00165488	0.402642	0.0429528	-2.42514	0.0153023	0.0278708	0.219482
hsa-miR-874-5p	3.77293	0.00106462	2.43065	0.00384604	-2.41665	0.015664	0.0146525	0.149456
hsa-miR-7706	3.23522	0.00065716	1.35143	0.00865934	-2.28395	0.0223744	0.0156155	0.155393
hsa-miR-29b-2-5p	10.2644	0.0169455	1.4849	0.0133335	-2.16192	0.0306245	0.047049	0.278203
hsa-miR-425-3p	6.73785	0.0145332	2.68279	0.00328918	-2.06008	0.0393904	0.00469072	0.0936026
hsa-miR-33b-5p	2.81333	0.00192275	0.819011	0.0127218	-1.97119	0.0487021	0.0498432	0.280143
hsa-miR-148a-3p	-21.8734	0.0204548	-1.47409	0.00580321	2.42452	0.0153287	0.031489	0.230369
hsa-miR-26b-5p	-19.4922	0.00435197	-2.77934	0.000365623	3.01712	0.00255189	0.00385586	0.0936026

## Sheet: gene interacted with M
	coef_Ms	p_Ms	coef_gene	p_gene	z_interaction	p_interaction	p_likelihood	adj.p
GOT2	55.1995	8.32996e-05	4.73701	0.000114355	-3.85559	0.00011545	0.000240686	0.283134
PAAF1	37.7724	0.000219516	5.08175	0.00088404	-3.61595	0.000299245	0.00242197	0.283134
RPTOR	25.5458	0.000179772	1.95809	0.000965325	-3.59158	0.00032868	0.00137232	0.283134
IL17RE	9.04857	5.99532e-05	1.0688	0.00220016	-3.58276	0.000339981	0.00130599	0.283134
STOML1	18.7739	0.000188672	1.5905	0.0109764	-3.53607	0.000406122	0.00218652	0.283134
ZNF837	15.3532	0.000228599	1.86717	0.00382247	-3.44343	0.000574393	0.00172998	0.283134
MAPKAPK3	33.4303	0.000370952	1.92197	0.00169751	-3.44036	0.000580934	0.00049614	0.283134
GTF3C1	49.1852	0.000459177	3.15399	0.0028097	-3.43092	0.000601548	0.00412733	0.283134
HSD17B8	18.0951	0.000300757	1.65672	0.00524236	-3.42364	0.000617885	0.00571771	0.283134
C15orf27	7.47242	9.42692e-05	1.20426	0.000285454	-3.41543	0.000636811	0.00111773	0.283134
MED9	27.7654	0.00050559	1.8765	0.032951	-3.36689	0.000760197	0.00279819	0.283134
ZSCAN5A	16.7965	0.000565616	3.68917	0.00152736	-3.28825	0.00100814	0.00585551	0.283134
SCCPDH	24.6829	0.00077786	2.82142	0.00115586	-3.21972	0.00128314	0.00226186	0.283134
FRMD1	5.17445	9.1309e-05	0.554701	0.00748765	-3.19568	0.00139502	0.000915605	0.283134
JMJD5	31.1833	0.00103707	2.13395	0.0304622	-3.18628	0.00144114	0.00251378	0.283134
NEURL2	6.68489	0.000204047	0.702188	0.00223613	-3.14158	0.0016804	0.00330201	0.283134
ENPP3	3.17508	2.09681e-05	0.362847	0.00220227	-3.13545	0.00171588	0.00483297	0.283134
PECI	26.814	0.00122238	1.99673	0.00484425	-3.11647	0.00183031	0.00908278	0.289464
FAM86C	20.8056	0.00116392	2.68714	0.0077744	-3.08725	0.00202017	0.00400056	0.283134
KRT8	13.2547	0.000984692	1.23991	0.00243823	-3.07832	0.00208173	0.00842143	0.289464
CSRP2BP	44.9043	0.00171035	4.34879	0.00880498	-3.06945	0.00214451	0.0120783	0.291428
RDH13	11.0719	0.00110338	1.70011	0.00820979	-3.02231	0.00250852	0.016027	0.297775
MGC16025	2.15328	3.57524e-05	0.513113	0.000649829	-3.00336	0.00267018	0.0016884	0.283134
RRAGD	17.6236	0.00150537	1.85503	0.00438143	-2.99819	0.00271586	0.0112041	0.289464
PCP4	1.63145	5.32062e-05	0.905276	0.000836084	-2.99588	0.00273657	0.00197463	0.283134
LOC25845	12.5463	0.00107942	1.66497	0.00101112	-2.98834	0.00280496	0.0120198	0.291291
TAF6L	29.8198	0.00206636	3.09935	0.0091558	-2.9809	0.00287404	0.0203884	0.297775
ACOT1	17.2212	0.00133799	2.49606	0.000620483	-2.97933	0.00288877	0.0022195	0.283134
CD99	16.1052	0.00149613	0.647076	0.0234082	-2.97897	0.00289222	0.00459841	0.283134
FAHD2A	25.0166	0.00185543	1.53099	0.0185022	-2.97709	0.00290995	0.00450715	0.283134
C12orf61	9.52029	0.000796456	2.50015	0.00111775	-2.97409	0.00293862	0.00351674	0.283134
PCCB	17.687	0.00159213	3.34776	2.23574e-05	-2.95945	0.00308185	0.000519997	0.283134
C10orf105	7.59469	0.000801719	0.883638	0.0411312	-2.94589	0.00322031	0.0141775	0.297775
PDHB	32.9457	0.00239169	3.10357	0.00692408	-2.9356	0.00332905	0.00980863	0.289464
COQ7	27.0683	0.00259811	3.19445	0.00868667	-2.90637	0.00365652	0.018609	0.297775
RAB42	6.58845	0.000699824	0.559498	0.027427	-2.90343	0.00369097	0.00899385	0.289464
PRR19	6.97375	0.00074085	1.38619	0.00341033	-2.89648	0.00377373	0.0104666	0.289464
PROC	3.64957	6.9119e-05	0.732487	0.000859929	-2.89373	0.00380689	0.00230107	0.283134
TLCD1	4.16455	0.000402126	0.941678	9.04654e-05	-2.89317	0.00381379	0.00131806	0.283134
C10orf58	15.3913	0.00192173	1.35438	0.00199203	-2.89303	0.0038155	0.0105716	0.289464
KATNB1	19.8517	0.00245983	1.56721	0.0459196	-2.87717	0.00401264	0.0120174	0.291291
RETN	2.54187	3.93205e-05	0.67679	0.00394074	-2.85755	0.00426927	0.00398529	0.283134
HIRIP3	25.9675	0.00299073	1.22266	0.0481624	-2.85197	0.00434487	0.00370171	0.283134
PDE6B	12.3014	0.00218433	1.37186	0.0148927	-2.80974	0.00495814	0.010198	0.289464
MTFMT	26.3114	0.00359542	3.13076	0.0128036	-2.80169	0.00508353	0.0229827	0.298829
PEMT	9.95964	0.0016795	0.670279	0.00598749	-2.8013	0.00508967	0.00867564	0.289464
PTOV1	25.6609	0.00358891	1.15647	0.0388701	-2.79128	0.00524996	0.00913524	0.289464
MAPKAPK2	17.2983	0.0033376	2.77798	2.97546e-05	-2.7907	0.00525946	0.000542002	0.283134
FAHD1	19.0494	0.00312202	1.82742	0.00248142	-2.7835	0.00537763	0.0108209	0.289464
SMARCAL1	29.473	0.00407474	2.40502	0.00400035	-2.76549	0.00568377	0.0212715	0.297775
CLYBL	9.12829	0.00189907	1.41336	0.0229204	-2.76229	0.0057398	0.0135092	0.297775
BRF2	18.0048	0.00360827	1.8763	0.0287091	-2.76015	0.00577741	0.0310816	0.307457
HGS	18.4129	0.00315543	1.70709	0.00128285	-2.75879	0.00580153	0.00270152	0.283134
SREBF1	19.9228	0.0036391	1.13074	0.00975768	-2.7552	0.00586567	0.01877	0.297775
NDUFAF3	19.4762	0.00384342	1.38535	0.0337194	-2.75424	0.00588282	0.0356093	0.313449
GYPE	5.04922	0.000997785	0.738996	0.0278984	-2.73902	0.00616226	0.020235	0.297775
ZNHIT2	8.25045	0.00198226	1.04098	0.00773842	-2.72893	0.00635399	0.0205421	0.297775
CA5A	2.18531	2.57688e-05	0.777492	0.002644	-2.72411	0.00644747	0.00495542	0.283134
C1orf51	5.34469	0.00104855	0.58531	0.00778092	-2.71432	0.00664128	0.0244024	0.3024
CFC1B	2.34275	0.000155234	0.338453	0.00739032	-2.71387	0.00665015	0.0179894	0.297775
HES4	8.06146	0.00211272	0.758975	0.017839	-2.71054	0.00671741	0.0101609	0.289464
GSTT1	3.28927	0.000618208	0.439187	0.00557976	-2.69993	0.00693539	0.00800036	0.289464
SMYD3	13.4898	0.00317456	1.64119	0.00252569	-2.69925	0.00694969	0.0110092	0.289464
ATP6V0E2	18.5885	0.00435282	1.43185	0.0010793	-2.69645	0.00700819	0.00835434	0.289464
CLEC1A	5.19203	0.00121273	0.437089	0.0451214	-2.69435	0.00705264	0.022929	0.298829
C2orf43	24.3993	0.00484271	2.87793	0.00744282	-2.6928	0.00708556	0.0206148	0.297775
DHX30	50.3243	0.00595556	2.72162	0.028724	-2.69056	0.00713329	0.00888589	0.289464
CIRH1A	38.5015	0.00575342	3.09408	0.0292117	-2.68722	0.00720503	0.0188955	0.297775
CTNND2	2.94114	0.000414077	0.475911	0.0468691	-2.68698	0.00721007	0.0208803	0.297775
HRASLS	4.56247	0.00119285	0.82196	0.0163604	-2.66696	0.00765413	0.0461118	0.322136
MGST3	20.0718	0.00506225	1.29157	0.0139247	-2.66276	0.00775029	0.0196993	0.297775
C19orf29	36.2305	0.0061079	2.17347	0.0283244	-2.65903	0.00783662	0.00407079	0.283134
GOLT1A	4.11627	0.00134201	0.569409	0.034704	-2.65364	0.00796296	0.0270274	0.305155
DDX28	25.0672	0.00524666	2.63643	0.00178345	-2.65143	0.00801508	0.00546694	0.283134
FHIT	8.04015	0.00234259	0.632192	0.0459383	-2.6476	0.00810644	0.00708287	0.283134
GCHFR	11.9163	0.00388248	0.663803	0.0206841	-2.63788	0.00834268	0.0064827	0.283134
PRSSL1	1.91019	5.85546e-05	0.376602	0.0276359	-2.63271	0.00847067	0.02054	0.297775
FADD	26.9438	0.00610277	2.46933	0.00940381	-2.62946	0.00855201	0.0162727	0.297775
C8orf33	26.1762	0.0065524	2.4867	0.0424019	-2.62487	0.00866823	0.0397359	0.315788
LOC389458	5.64104	0.00185723	1.15815	0.0145069	-2.61551	0.00890954	0.012956	0.295576
CHRNA9	1.92594	4.26006e-05	0.657799	0.0119032	-2.59824	0.0093702	0.0162456	0.297775
SLC25A22	9.60185	0.00486724	2.0029	0.00116198	-2.59801	0.00937658	0.0102673	0.289464
PYCRL	7.03819	0.0028084	1.3977	0.00109415	-2.59481	0.00946424	0.0119343	0.291291
CIAPIN1	15.1571	0.0051643	1.71463	0.0229265	-2.59399	0.00948693	0.0150664	0.297775
RRP1B	46.614	0.00811947	6.14421	0.00231341	-2.58649	0.0096958	0.00457071	0.283134
NIT2	9.61201	0.00522787	2.21547	6.27622e-05	-2.58535	0.00972799	0.000583437	0.283134
PHLDB3	19.1126	0.00603662	1.81519	0.0157488	-2.58275	0.00980175	0.0112869	0.289827
DCLK3	2.59535	0.000291213	0.473726	0.0222112	-2.58078	0.00985781	0.0361645	0.313449
C16orf5	21.6772	0.00666045	1.67612	0.0137957	-2.57796	0.00993846	0.0147938	0.297775
C15orf44	26.5913	0.00652613	4.00103	0.000911381	-2.57669	0.00997516	0.00112974	0.283134
LOC149134	3.60722	0.000817373	0.363199	0.0347458	-2.56948	0.0101852	0.0402611	0.31616
CCT3	11.9993	0.00488032	2.03407	0.000769532	-2.56908	0.010197	0.00381605	0.283134
PHB2	19.2371	0.00672148	3.07334	0.000861376	-2.56455	0.0103311	0.00499467	0.283134
HADH	17.1238	0.00659429	1.06609	0.0447584	-2.55656	0.0105712	0.0385005	0.313508
SFXN1	11.4643	0.00434083	2.8449	0.000446213	-2.55304	0.0106786	0.00125678	0.283134
C6orf226	13.6864	0.0054663	1.22907	0.00426514	-2.54877	0.0108103	0.0104026	0.289464
SUPV3L1	10.1889	0.004889	1.84931	0.00285604	-2.54535	0.0109169	0.0201127	0.297775
POLR3F	23.9308	0.00739444	3.82918	0.000554884	-2.54134	0.011043	0.0100357	0.289464
CCDC28B	4.54046	0.00190384	0.835528	0.00282746	-2.54117	0.0110483	0.0209971	0.297775
LOC389332	1.89298	0.000131514	0.659109	0.0065887	-2.53691	0.0111837	0.0275931	0.305908
VPS72	17.3525	0.00697987	2.75504	0.00151119	-2.53388	0.0112807	0.00984946	0.289464
C1orf128	9.29141	0.00451222	0.62894	0.0291475	-2.52664	0.0115159	0.0231534	0.299073
CEP70	9.27921	0.0046729	0.805125	0.0265001	-2.52411	0.0115992	0.0384262	0.313508
TLX2	2.10295	0.000153387	0.518961	0.0311037	-2.52172	0.0116783	0.0259067	0.303818
TEKT2	3.73258	0.00091362	0.457399	0.0387411	-2.52091	0.0117052	0.0284688	0.306779
MPI	23.5109	0.00863654	2.42321	0.0110902	-2.51565	0.0118815	0.0471521	0.322318
PKM2	14.4633	0.00710085	1.74624	0.000418988	-2.51388	0.0119411	0.00173689	0.283134
ROPN1L	1.93105	5.05692e-05	0.943522	0.00789045	-2.50903	0.0121062	0.0223622	0.297775
ENO1	14.2342	0.00717001	1.76805	0.00232274	-2.50443	0.0122649	0.0105341	0.289464
LOC81691	6.96959	0.00329225	0.631933	0.0368634	-2.49967	0.0124309	0.0207274	0.297775
HMG20B	15.522	0.00711333	1.22246	0.00785251	-2.49727	0.0125154	0.0126623	0.294135
C18orf10	20.6332	0.00876076	1.31963	0.0498408	-2.49712	0.0125208	0.0536269	0.327683
MRPL13	10.5734	0.0054924	2.33547	0.00343326	-2.49133	0.0127265	0.00933605	0.289464
FLT3LG	19.9698	0.00897691	1.23023	0.0199118	-2.49002	0.0127735	0.0222938	0.297775
DHRSX	28.3426	0.00956759	2.31398	0.0212614	-2.4887	0.0128211	0.00978675	0.289464
DAPL1	2.51153	0.00150886	0.634486	0.0024243	-2.47823	0.0132035	0.0135449	0.297775
ACOT7	6.13239	0.00253371	0.793171	0.00589344	-2.4777	0.0132231	0.0110996	0.289464
HMHB1	1.7736	0.000112511	0.376491	0.0422703	-2.4771	0.0132456	0.0165305	0.297775
TSFM	11.9218	0.0062406	2.56771	3.05108e-05	-2.47526	0.013314	0.000720773	0.283134
TESC	2.98315	0.000387378	0.540487	0.000411801	-2.4734	0.0133835	0.00506674	0.283134
MYL6B	14.0941	0.0077986	0.959363	0.0268759	-2.46794	0.0135894	0.0385286	0.313508
HMOX2	11.2125	0.00674272	1.90172	0.00302323	-2.46583	0.0136697	0.0180154	0.297775
RFWD2	14.8468	0.00812707	2.81918	0.00670609	-2.4629	0.013782	0.0241616	0.302113
DUT	17.5048	0.0086712	1.19914	0.0146331	-2.4623	0.0138048	0.0251043	0.302706
TUFM	13.9098	0.00771593	2.07622	0.00195946	-2.46218	0.0138095	0.0120098	0.291291
NDUFA9	11.3135	0.00671788	1.95474	0.000827906	-2.45063	0.0142605	0.00600065	0.283134
PSMB4	13.1541	0.00762768	1.8032	0.00167454	-2.4487	0.0143371	0.00797423	0.289464
VDAC2	20.9242	0.00978179	3.01998	0.000533191	-2.44226	0.0145956	0.00568676	0.283134
TTC15	21.5397	0.0101802	1.57834	0.014133	-2.44093	0.0146495	0.0228739	0.298822
LLPH	10.7831	0.00748571	2.51495	0.00188721	-2.43943	0.0147106	0.0100626	0.289464
CKLF	21.226	0.0103133	1.21377	0.0326231	-2.43841	0.0147522	0.0171824	0.297775
PSTK	11.5003	0.00752727	1.97548	0.0189396	-2.43826	0.0147582	0.0337326	0.311262
UCHL3	7.74207	0.0048095	2.02922	0.00290967	-2.43389	0.0149374	0.00969402	0.289464
WDR61	23.583	0.0106589	2.73732	0.00412743	-2.43065	0.0150716	0.0210987	0.297775
SPSB2	11.4289	0.00821602	1.78511	0.00660139	-2.429	0.0151407	0.0241661	0.302113
ATP5G1	7.12958	0.00469696	1.10909	0.00174475	-2.42889	0.0151449	0.0145164	0.297775
TACO1	11.285	0.0072991	1.84015	0.00123104	-2.42656	0.0152429	0.0105959	0.289464
ATP5C1	18.0693	0.00914783	2.09799	0.00679876	-2.42544	0.01529	0.00922671	0.289464
C16orf53	24.3533	0.0112202	1.55405	0.0306814	-2.42493	0.0153113	0.0336695	0.311262
PRCC	13.7465	0.00895976	2.03359	0.0088828	-2.42194	0.0154379	0.0367923	0.313508
DUS3L	21.1593	0.0106632	1.63824	0.0181563	-2.42134	0.0154636	0.0199683	0.297775
PSMC4	16.6039	0.00943692	2.35298	0.000646111	-2.41899	0.0155635	0.00707299	0.283134
CCDC86	22.3422	0.0108384	2.68583	0.00429889	-2.41574	0.0157031	0.0182141	0.297775
ATP5J	16.7334	0.0100167	1.32444	0.022942	-2.41276	0.0158323	0.0283165	0.306524
HINT1	13.3638	0.0095895	2.25926	0.000898582	-2.40466	0.0161875	0.00716416	0.283687
CCDC127	21.6314	0.0114626	3.06986	0.00689268	-2.39811	0.0164799	0.0394421	0.315537
GIT1	36.4889	0.0131853	2.62991	0.00282834	-2.39401	0.0166651	0.00801263	0.289464
MRPS16	11.3764	0.00810512	1.87808	0.00165154	-2.39257	0.0167309	0.0140162	0.297775
MTX1	9.62957	0.00738028	1.39953	0.00114014	-2.39168	0.0167716	0.0135457	0.297775
FEM1A	17.7653	0.0104344	2.62374	0.008892	-2.38978	0.0168584	0.0255833	0.303164
HIST1H1C	6.85244	0.00479669	0.629183	0.0191179	-2.38921	0.0168849	0.0384283	0.313508
RNF40	57.5028	0.0151007	4.10949	0.0330214	-2.3876	0.0169588	0.0561187	0.327683
CBX4	16.9379	0.0109641	1.72823	0.0230272	-2.38746	0.0169654	0.0380065	0.313508
C20orf165	4.16871	0.00202077	0.955314	0.00372524	-2.38238	0.017201	0.0160644	0.297775
TPI1	10.3414	0.00875933	1.53293	0.000456983	-2.37883	0.0173676	0.00408737	0.283134
MRPL12	6.53866	0.00528448	0.958983	0.00377883	-2.37724	0.0174429	0.0271763	0.30548
ABCA3	12.1368	0.011013	1.43772	0.00268611	-2.37372	0.01761	0.00735573	0.285803
BEST4	3.78211	0.00226372	0.60684	0.0324126	-2.37185	0.0176994	0.0819936	0.346209
HKDC1	2.66985	0.000675837	0.38787	0.0286396	-2.37123	0.0177292	0.0431941	0.320926
GAA	17.6943	0.0117973	0.993207	0.0308855	-2.36934	0.0178197	0.0383794	0.313508
OBFC2B	10.4243	0.00956171	2.03068	0.00320036	-2.36773	0.0178975	0.0180384	0.297775
PIN1L	2.03929	0.000332705	1.71934	0.0190582	-2.36595	0.0179838	0.0420737	0.319026
CDH23	8.89109	0.00882838	0.959344	0.0488424	-2.36541	0.0180101	0.0610786	0.329973
SEPX1	11.3043	0.00983088	2.26401	0.000173341	-2.36061	0.018245	0.00186354	0.283134
TAGLN2	11.0787	0.00981437	1.60302	0.00437301	-2.35741	0.018403	0.017208	0.297775
USP5	13.7561	0.0109273	1.89121	0.00224253	-2.35218	0.0186636	0.0173304	0.297775
ILVBL	25.5136	0.0142906	1.8665	0.0372405	-2.35137	0.0187046	0.0516985	0.325448
TFF3	2.51762	0.000229051	0.370768	0.00608935	-2.34981	0.0187828	0.0170464	0.297775
BDH1	6.5904	0.00457639	1.57353	0.00168747	-2.34634	0.0189588	0.00245841	0.283134
GPER	4.55641	0.00270751	0.498204	0.00880976	-2.34603	0.0189746	0.0462129	0.322136
CCDC106	9.49308	0.00845521	1.26953	0.00133218	-2.34143	0.0192099	0.0104032	0.289464
GOLGA8C	1.82359	0.000246162	1.09477	0.00262808	-2.34041	0.0192626	0.0199855	0.297775
GAPDH	10.049	0.00840643	1.15771	0.00285509	-2.34007	0.0192803	0.00917533	0.289464
MRPS30	11.0458	0.00886193	2.80331	0.000114369	-2.33901	0.0193351	0.00178092	0.283134
LYPLAL1	12.2638	0.0114049	1.8727	0.0133472	-2.33705	0.0194364	0.0551301	0.327683
MBLAC1	7.83359	0.00683455	0.847604	0.025239	-2.33685	0.0194468	0.0317822	0.307457
LOC100125556	5.22197	0.0043322	1.26539	0.00939839	-2.33563	0.0195103	0.0409098	0.316252
TMEM129	24.4938	0.0147862	1.74295	0.0473257	-2.33535	0.0195254	0.0563416	0.327683
MTCH2	12.7105	0.0112373	2.47187	0.00606248	-2.33365	0.019614	0.0177762	0.297775
RNF25	16.6117	0.0124024	1.32546	0.0244496	-2.32938	0.0198391	0.0259536	0.304011
PET112L	20.3591	0.012773	2.41156	0.000848586	-2.32927	0.0198446	0.00657167	0.283134
CYC1	8.80377	0.00821253	1.20009	0.00383492	-2.32176	0.0202461	0.0182362	0.297775
TSSC1	10.902	0.00972983	1.45075	0.0335809	-2.32098	0.0202877	0.0398027	0.315788
FKBP1A	9.58414	0.0107529	1.41292	0.00882762	-2.32053	0.0203125	0.0453476	0.32172
GTF2H5	12.2844	0.0107268	1.04406	0.0365518	-2.3179	0.0204547	0.0371062	0.313508
RPL26L1	9.5076	0.00836199	1.75188	0.00155774	-2.31528	0.0205976	0.0112878	0.289827
SPRYD4	19.2139	0.0146649	2.82713	0.010945	-2.3131	0.0207174	0.0501375	0.324265
PHACTR3	3.12634	0.000980949	0.475891	0.0117592	-2.30717	0.0210456	0.0286827	0.30714
FAM174B	10.6394	0.0106823	0.943258	0.0380692	-2.30637	0.0210898	0.0538619	0.327683
LOC440356	3.24627	0.0018476	0.698526	0.0129298	-2.3061	0.0211049	0.0412093	0.316252
CCDC137	8.59944	0.00901559	1.52435	0.00584765	-2.30477	0.0211794	0.0288962	0.30714
SYNM	7.52467	0.00723409	0.922436	0.000756631	-2.30381	0.0212333	0.00339008	0.283134
CHCHD4	22.2494	0.0149754	3.31612	0.00156604	-2.30035	0.0214281	0.00576818	0.283134
EFTUD2	14.5049	0.0123108	2.39735	0.00101814	-2.29989	0.0214543	0.00754824	0.287876
NDUFAF4	11.5705	0.0113889	1.46932	0.0227828	-2.29981	0.0214588	0.0385175	0.313508
EMG1	10.9567	0.0108064	1.91198	0.000801791	-2.29805	0.0215589	0.00930575	0.289464
LDHA	11.8685	0.00930317	2.49594	2.73861e-05	-2.29791	0.0215671	5.42139e-05	0.283134
VEGFB	12.4606	0.0124476	1.39793	0.00419066	-2.2979	0.0215674	0.0263195	0.305155
LOC100129066	2.25448	0.000877821	0.569425	0.00202075	-2.29577	0.0216891	0.00962376	0.289464
PTRH2	6.80898	0.00752741	1.46476	0.00273863	-2.29498	0.0217344	0.0221967	0.297775
UQCRC1	13.2699	0.0124588	1.30941	0.015482	-2.29405	0.0217874	0.0359462	0.313449
TOMM40	9.78382	0.00989198	1.40778	0.00862509	-2.29018	0.0220109	0.0289644	0.30714
CCDC58	7.13409	0.00721105	1.7631	0.00623795	-2.29011	0.0220151	0.0231836	0.299073
CHCHD8	12.1469	0.0127205	2.03599	0.00605134	-2.28884	0.0220884	0.0299029	0.30714
C8G	2.85025	0.00123935	0.764664	0.0025516	-2.28879	0.0220913	0.0136295	0.297775
?	10431	14.5802	0.0129206	1.95914	0.00523552	-2.28755	0.0221635	0.0194307	0.297775
CHMP1A	29.2864	0.0176991	1.731	0.0475024	-2.28365	0.022392	0.0339364	0.311718
C15orf40	18.1454	0.0151492	2.39108	0.00447196	-2.28097	0.0225502	0.0266193	0.305155
DDX11	9.03358	0.0108155	0.840717	0.0459346	-2.27751	0.022756	0.0649486	0.333424
JMJD4	8.17497	0.0112293	1.49337	0.00205332	-2.27694	0.0227898	0.0222415	0.297775
TUBA1C	8.86481	0.0105655	1.52697	0.00416546	-2.27665	0.0228069	0.0153962	0.297775
COQ9	16.9365	0.0147528	1.46656	0.00744147	-2.27555	0.0228727	0.0310455	0.307457
NOL10	15.2791	0.0144202	3.55506	0.00959128	-2.27549	0.0228767	0.0307727	0.307457
EXOSC7	18.0648	0.0157235	1.69449	0.0327389	-2.27337	0.023004	0.0482459	0.322437
DHRS11	13.1532	0.0144966	2.05139	0.00377546	-2.26897	0.0232704	0.0148532	0.297775
NME1	6.00053	0.0064863	1.00684	0.00937435	-2.26188	0.0237045	0.0333545	0.310718
VPS25	11.1269	0.0126986	2.00376	0.00421973	-2.25688	0.0240153	0.0215647	0.297775
RPUSD2	13.8912	0.0142894	1.89767	0.0228825	-2.25643	0.024044	0.0439453	0.321566
RARS	17.7853	0.0158616	3.49282	0.00011124	-2.25451	0.0241641	0.0013901	0.283134
STRADA	22.2671	0.0172818	3.03528	0.013848	-2.25295	0.024262	0.0317073	0.307457
HSD17B1	7.49817	0.00803285	0.997344	0.00705199	-2.25201	0.0243214	0.0153628	0.297775
LRRC10B	2.32725	0.000310123	0.405452	0.0192997	-2.25026	0.0244324	0.0310372	0.307457
SCAMP3	10.0283	0.0133144	1.56768	0.00270783	-2.24798	0.0245775	0.0222302	0.297775
ACOT2	11.3821	0.0131975	2.06581	0.00675219	-2.24517	0.0247575	0.028632	0.30714
DOHH	8.12522	0.0111594	1.35647	0.00692187	-2.24414	0.0248235	0.0388704	0.314345
POLDIP2	14.7581	0.0140705	1.98421	0.00208544	-2.24385	0.0248417	0.0137511	0.297775
RG9MTD1	13.859	0.0154382	3.82256	0.00135583	-2.24385	0.0248418	0.00263925	0.283134
LOC388955	9.87075	0.0130248	1.75768	0.00603755	-2.24281	0.0249091	0.0271165	0.30548
DIABLO	11.758	0.0137347	2.21001	0.00449331	-2.24201	0.0249608	0.0232415	0.299073
CXorf49B	1.50534	0.000429409	0.289216	0.0464395	-2.24059	0.0250524	0.0500261	0.324265
ACP1	17.1046	0.0155435	3.49108	0.00236061	-2.23985	0.0251005	0.00866145	0.289464
PA2G4	14.3514	0.0155036	1.79886	0.00801719	-2.23755	0.0252507	0.0265289	0.305155
HDGF	12.303	0.0142311	2.00347	0.00668078	-2.23709	0.0252806	0.018951	0.297775
CTDP1	18.0573	0.0178123	2.10488	0.0181695	-2.23683	0.0252971	0.0374961	0.313508
ATP5B	15.2414	0.0154412	2.20834	0.00152014	-2.23276	0.0255651	0.00660149	0.283134
WNK2	14.2412	0.0162604	1.11556	0.0252357	-2.23074	0.0256984	0.0311548	0.307457
ACBD6	14.9005	0.0151785	2.7974	0.000840279	-2.22925	0.0257975	0.00499101	0.283134
MRPL22	9.14545	0.0109954	1.31963	0.011058	-2.22662	0.0259726	0.0303658	0.307326
FH	12.2319	0.01336	2.08048	0.00139265	-2.22559	0.0260414	0.00563637	0.283134
ADPRHL2	19.3475	0.0184249	1.73978	0.0209108	-2.22512	0.0260729	0.0445845	0.321699
LSM3	9.02191	0.0114171	1.13199	0.0215646	-2.22379	0.0261626	0.0446435	0.321699
UTF1	1.71436	5.35802e-05	0.502559	0.00309691	-2.22305	0.0262125	0.0174107	0.297775
HMBS	6.84355	0.00943595	1.3264	0.0168491	-2.21962	0.0264444	0.0544758	0.327683
TRAPPC3	13.9627	0.015716	2.27141	0.00524365	-2.21958	0.0264471	0.0246011	0.302706
PSMC5	15.6006	0.0172244	1.66711	0.00365574	-2.21712	0.0266148	0.0234196	0.299073
PHB	13.0827	0.0159727	1.29948	0.0129959	-2.21633	0.0266687	0.0459089	0.322136
MRPL15	9.88059	0.0121545	1.9572	0.00258538	-2.21168	0.0269885	0.0103081	0.289464
HAGH	16.8452	0.0177601	1.23055	0.0179994	-2.21164	0.0269914	0.0316104	0.307457
PSMB2	12.1772	0.0157059	1.72752	0.00816473	-2.21097	0.0270381	0.0340637	0.312074
SLC9A3R1	9.21599	0.0132004	1.30647	0.0070509	-2.21052	0.0270688	0.0435473	0.32109
CDKN2AIPNL	7.60693	0.0102239	1.24633	0.00941933	-2.20952	0.0271384	0.0446572	0.321699
COG2	15.2031	0.0171014	2.43699	0.00446576	-2.20649	0.02735	0.01781	0.297775
MRPL4	7.61762	0.0112333	1.01745	0.0133901	-2.20617	0.027372	0.0566195	0.327912
JTB	9.72296	0.0145002	1.58752	0.00275188	-2.20576	0.027401	0.0210267	0.297775
PSMD4	11.1823	0.0151023	1.50514	0.00355051	-2.20544	0.027423	0.021818	0.297775
C15orf63	7.49307	0.0112193	1.0465	0.0082544	-2.20446	0.0274919	0.0424142	0.319026
LOC283999	1.56731	0.000104118	0.33236	0.00558083	-2.20352	0.027558	0.022686	0.298135
POLR3C	18.1975	0.0199376	2.76358	0.00439768	-2.19916	0.0278668	0.0251547	0.302706
C17orf99	1.66983	0.000411256	0.602863	0.00619777	-2.19629	0.0280712	0.037608	0.313508
MRPS23	13.0518	0.016849	2.29208	0.00323907	-2.19608	0.0280864	0.019117	0.297775
C11orf49	17.3755	0.0195456	1.59621	0.0425729	-2.19603	0.0280897	0.0644849	0.333388
SUCLG1	20.2851	0.0204895	1.78419	0.0418252	-2.1938	0.02825	0.0514508	0.325448
MRPL38	9.16004	0.0135795	1.14481	0.0102791	-2.1937	0.0282569	0.050597	0.324265
TMEM85	26.195	0.0218321	2.21004	0.0329136	-2.19336	0.0282814	0.047326	0.322318
CSTB	16.6303	0.0189535	1.58319	0.00541717	-2.19279	0.0283222	0.0207942	0.297775
IMPA2	11.9327	0.0167613	1.15868	0.0452272	-2.19162	0.0284071	0.0783789	0.34485
FAM103A1	14.4808	0.0154554	2.64106	0.00372558	-2.1908	0.0284662	0.0140938	0.297775
IRX6	3.1924	0.00208444	0.374712	0.0337722	-2.19012	0.0285156	0.0545678	0.327683
APOA1BP	7.88587	0.0126199	1.19793	0.00479327	-2.189	0.0285972	0.0294824	0.30714
TIMM17A	10.3616	0.0124147	2.21417	1.42353e-05	-2.18866	0.0286214	0.00045094	0.283134
C8orf55	11.8123	0.0162415	1.55629	0.011157	-2.18718	0.0287292	0.0314936	0.307457
COX4NB	20.0628	0.0206365	1.73169	0.0467817	-2.18701	0.0287415	0.0581989	0.329973
GABRA5	1.70231	0.000154262	0.258757	0.0170019	-2.18538	0.0288614	0.0467648	0.322136
SFT2D3	13.0422	0.0160069	1.7663	0.0408161	-2.18427	0.0289424	0.0468452	0.322136
SETD8	21.6768	0.0207503	2.31849	0.028246	-2.18417	0.0289498	0.0466109	0.322136
ZNF511	10.6522	0.0164829	1.87744	0.00561472	-2.18384	0.0289744	0.0244347	0.3024
JAGN1	18.7865	0.0211255	1.85453	0.0431263	-2.18382	0.0289756	0.0583419	0.329973
GNA15	9.39847	0.0145397	0.743731	0.0273108	-2.1815	0.0291463	0.05387	0.327683
NDUFB9	8.42359	0.0135065	1.10225	0.00954378	-2.18116	0.0291719	0.0494032	0.323365
LSM12	12.7326	0.0147768	3.46635	0.000212452	-2.18107	0.0291782	0.00106838	0.283134
FTSJ3	16.615	0.0201495	2.3011	0.00455993	-2.18005	0.0292538	0.0286873	0.30714
MRPS12	6.36779	0.010065	0.99075	0.00875362	-2.17847	0.0293713	0.0461841	0.322136
PSMD6	25.5282	0.0225024	2.39798	0.0458164	-2.17821	0.0293907	0.0477591	0.322437
SLC25A39	11.2288	0.0167308	1.80286	0.00443697	-2.17795	0.0294095	0.0225005	0.297775
ATP5O	10.734	0.0154544	1.13073	0.00954636	-2.17459	0.0296608	0.0384719	0.313508
APITD1	11.1909	0.0156605	1.65953	0.0346419	-2.1727	0.029803	0.0560563	0.327683
LRRC23	10.3243	0.0155453	1.64734	0.00477078	-2.17255	0.0298144	0.0310086	0.307457
STRA13	5.51158	0.00806391	0.831748	0.0199648	-2.17246	0.0298209	0.067079	0.336096
NAP1L4	15.7357	0.0201464	2.58338	0.0115475	-2.17127	0.0299109	0.0385862	0.313693
MIF	8.42638	0.013482	0.849515	0.0141461	-2.17086	0.029942	0.0545307	0.327683
CCDC56	9.12213	0.0152066	1.39235	0.00666557	-2.1703	0.0299838	0.0432905	0.32109
HIST1H4H	5.59404	0.00731549	0.955388	0.00806848	-2.16892	0.030089	0.0325164	0.309673
LOC100192426	1.502	9.20826e-05	0.531924	0.00183555	-2.1678	0.0301736	0.0146961	0.297775
IFI27	4.16128	0.00533011	0.522708	0.00156744	-2.16643	0.0302786	0.00598605	0.283134
TUBG1	11.0772	0.0141223	1.69376	0.00377184	-2.16582	0.0303249	0.0176681	0.297775
IDH3A	14.5732	0.0195188	1.36847	0.0338077	-2.16579	0.0303276	0.0645075	0.333388
C17orf90	7.76693	0.0125	1.1637	0.00551859	-2.16305	0.0305374	0.0312978	0.307457
RSAD1	18.2597	0.020842	2.10991	0.00947221	-2.16264	0.0305687	0.0314043	0.307457
ICT1	9.49766	0.013438	1.98214	0.00227867	-2.1619	0.0306257	0.00926457	0.289464
THAP4	19.3781	0.0224373	1.68025	0.0210181	-2.15963	0.0308009	0.05429	0.327683
NANOS1	9.53303	0.0141388	1.45628	0.00813592	-2.15931	0.030826	0.0334434	0.310718
MRM1	7.29118	0.0149011	1.69033	0.000573541	-2.15834	0.0309014	0.00624931	0.283134
FAM36A	13.17	0.0199184	1.43206	0.03552	-2.15686	0.0310164	0.0900333	0.352671
C2orf24	19.6145	0.0220053	2.13258	0.0110482	-2.15682	0.0310194	0.0333414	0.310718
LONP1	19.4852	0.0229135	2.31025	0.0141636	-2.15598	0.0310852	0.0393211	0.315397
FLJ45079	2.48458	0.00153884	1.31209	0.0102785	-2.15544	0.0311274	0.0379733	0.313508
RNASEH1	11.3293	0.0181629	3.11745	0.000641547	-2.15445	0.0312046	0.000799637	0.283134
DTNBP1	18.9834	0.0227577	1.24315	0.0344406	-2.15438	0.0312101	0.0518049	0.325541
POP4	10.1176	0.0164879	1.43501	0.0373055	-2.15181	0.0314123	0.0718586	0.340316
BLMH	13.3359	0.0162726	2.04773	0.00715326	-2.15108	0.0314702	0.0199907	0.297775
BNIP1	8.85655	0.0137758	1.18949	0.0116928	-2.14996	0.0315583	0.0404719	0.31616
RUVBL1	9.23249	0.0132081	1.84535	0.00371031	-2.14941	0.0316023	0.0125184	0.293374
DNLZ	3.97126	0.00480948	0.581921	0.028798	-2.14848	0.0316758	0.0716662	0.340183
C19orf28	11.8294	0.0176347	1.06011	0.00717653	-2.14794	0.0317184	0.0253657	0.302924
PGAM1	16.8519	0.0202683	2.8423	8.62101e-05	-2.1477	0.0317376	0.00048339	0.283134
ASPSCR1	8.14978	0.0145403	1.02088	0.0210887	-2.14535	0.0319245	0.0703595	0.338682
PSMA4	12.3307	0.0185717	1.49474	0.00691794	-2.14521	0.0319358	0.0265614	0.305155
ISG20	4.20949	0.00551925	0.700993	0.0060395	-2.14505	0.0319488	0.0168284	0.297775
FLJ33630	13.638	0.0210208	1.55293	0.0477946	-2.14484	0.0319655	0.0980982	0.358596
C16orf91	9.69283	0.0159266	1.35559	0.0221934	-2.1447	0.0319769	0.0588932	0.329973
COASY	16.5916	0.0215108	2.22522	0.00732771	-2.1441	0.0320251	0.0369553	0.313508
RPP40	7.38643	0.0108839	1.52542	0.00859722	-2.14358	0.0320662	0.0304691	0.307326
SPOP	28.3301	0.0259443	3.30306	0.0254029	-2.14158	0.0322271	0.0718557	0.340316
PTPMT1	19.2325	0.0236928	2.15253	0.0210468	-2.14134	0.0322465	0.0548544	0.327683
UQCRFS1	8.82846	0.0140964	1.44961	0.00538067	-2.13941	0.0324029	0.0215445	0.297775
LOC100009676	14.7101	0.0256352	3.48111	0.000424681	-2.13888	0.0324458	0.00119843	0.283134
DCAF13	12.1496	0.0179944	2.69507	0.00500971	-2.13803	0.0325146	0.0210926	0.297775
ERAL1	12.7247	0.0193295	1.64341	0.00384979	-2.1355	0.0327203	0.0343011	0.312129
PDF	5.11522	0.00675032	0.834987	0.0129253	-2.13389	0.0328518	0.0501906	0.324265
SLC25A3	24.1209	0.0248991	3.08032	0.00155973	-2.13292	0.0329312	0.0070214	0.283134
CTU2	12.0983	0.0196424	1.3013	0.0242763	-2.13012	0.0331614	0.0529331	0.326905
ATP6V0C	21.4495	0.0252519	1.8517	0.00603074	-2.12812	0.0333274	0.0243759	0.3024
ECE2	3.55449	0.00404743	0.985826	0.0119198	-2.12581	0.0335193	0.0392119	0.314913
PSMC3	12.174	0.019895	1.10894	0.0321129	-2.12467	0.0336143	0.06532	0.33377
TMEM223	12.7158	0.0206864	1.51207	0.0280809	-2.12435	0.0336406	0.0610797	0.329973
COX6A1	8.28527	0.0145135	1.27418	0.00463546	-2.12316	0.0337406	0.023299	0.299073
C11orf2	29.89	0.0277874	1.4997	0.0447987	-2.12131	0.0338957	0.0345231	0.312129
MRPL34	9.28974	0.0162049	1.2503	0.0198661	-2.11928	0.0340668	0.044084	0.321699
SOD1	20.9297	0.0259078	2.50781	0.00267919	-2.119	0.0340903	0.0136437	0.297775
YARS2	9.2122	0.0169075	2.54525	0.000204369	-2.11847	0.0341352	0.00234007	0.283134
PMF1	10.4769	0.019264	1.54688	0.00701037	-2.11803	0.0341722	0.0381652	0.313508
IGFBPL1	1.4764	0.000215963	0.324034	0.0295206	-2.11658	0.0342954	0.0583856	0.329973
ALKBH2	7.87025	0.0159187	1.38833	0.0124213	-2.11633	0.0343168	0.0620359	0.330674
TMEM186	9.91915	0.0182582	1.60489	0.013745	-2.11532	0.0344026	0.0588029	0.329973
TSTA3	7.43849	0.014387	1.09925	0.0177343	-2.11487	0.0344408	0.0597805	0.329973
CLTB	9.66684	0.0180474	0.921992	0.0330345	-2.11332	0.0345737	0.0633305	0.332355
NOP16	5.2807	0.00896676	1.3002	0.0102127	-2.11246	0.0346467	0.0292162	0.30714
GEMIN6	8.41373	0.0157651	1.52469	0.0155787	-2.11206	0.0346809	0.0515519	0.325448
C14orf156	6.69017	0.0128222	1.06607	0.00878316	-2.11024	0.0348374	0.04039	0.31616
UFSP1	4.53932	0.00726356	1.03825	0.00552414	-2.10738	0.0350847	0.0358509	0.313449
VAC14	22.1899	0.026377	1.97906	0.0123667	-2.1058	0.0352216	0.032537	0.309691
ALDOA	13.1479	0.0214769	1.56837	0.000676174	-2.10515	0.0352783	0.00633924	0.283134
ORMDL2	7.31528	0.016082	1.461	0.00568759	-2.10504	0.0352878	0.0345852	0.312129
ISG15	6.18702	0.0151435	0.792568	0.00173799	-2.10414	0.0353659	0.013657	0.297775
PIGC	24.5355	0.0277683	2.33206	0.0210038	-2.10299	0.0354669	0.0632992	0.332296
COPS3	13.4979	0.0219762	1.21414	0.0491298	-2.1028	0.0354829	0.0668282	0.335972
LSM4	7.96872	0.0148975	0.878906	0.016048	-2.10217	0.0355384	0.0521598	0.32652
VDAC1	11.2428	0.0174239	2.22761	0.00111628	-2.09967	0.0357582	0.00517319	0.283134
FBXW9	6.47263	0.0148722	1.21625	0.0193986	-2.09829	0.0358792	0.0825489	0.346742
PSMB6	10.9948	0.0204919	0.976099	0.0270598	-2.09761	0.0359396	0.0669063	0.335972
SMUG1	8.80362	0.0192909	1.76737	0.00443264	-2.09674	0.0360162	0.0329761	0.310047
RNF126	9.05526	0.018261	1.32302	0.0193896	-2.09576	0.0361037	0.067219	0.336096
NCS1	8.86855	0.0188697	0.819175	0.0367278	-2.09573	0.0361059	0.0957207	0.357072
COPE	14.7231	0.0240522	0.991214	0.0441629	-2.09445	0.0362196	0.0595996	0.329973
IGFBP1	1.4527	0.00013304	0.641836	0.00486777	-2.09407	0.0362541	0.0355405	0.313449
MRPL46	17.1367	0.0257413	2.14034	0.00442164	-2.09361	0.0362944	0.0203716	0.297775
PQLC1	14.7526	0.0247973	1.30381	0.0297145	-2.09071	0.0365538	0.0593521	0.329973
ODC1	12.6538	0.020929	2.75467	3.95712e-05	-2.09004	0.0366144	0.000120594	0.283134
NSMCE2	13.5037	0.0206697	2.36583	0.00358194	-2.08939	0.0366727	0.0132801	0.297775
C6orf153	14.2815	0.0241403	1.32527	0.0457119	-2.08924	0.0366861	0.0692522	0.338487
TMEM183A	12.6866	0.0227572	2.14093	0.0104197	-2.0891	0.0366989	0.0440798	0.321699
TMEM93	8.03982	0.016823	1.18401	0.0126386	-2.08887	0.0367198	0.0545213	0.327683
TINF2	20.5276	0.0278579	1.85364	0.0425645	-2.08865	0.0367392	0.103821	0.362694
TMEM111	13.1502	0.0235829	1.70201	0.00519156	-2.08834	0.0367673	0.0339352	0.311718
MRPL27	7.58364	0.0155468	0.835079	0.0217476	-2.08492	0.0370762	0.0696407	0.338487
USMG5	7.64669	0.0158066	1.11111	0.0151633	-2.08211	0.0373327	0.0513366	0.325448
CHCHD1	7.65879	0.0152966	1.4249	0.0093256	-2.08092	0.0374414	0.0363583	0.313508
NDUFAB1	7.77416	0.0158412	1.32604	0.00407674	-2.08078	0.0374544	0.0275215	0.305524
ATP5I	6.03	0.0127398	0.773226	0.00794698	-2.07923	0.037596	0.0480345	0.322437
PCOTH	1.65457	0.000315482	0.675487	0.00700493	-2.07914	0.0376045	0.0516733	0.325448
TM7SF2	12.0597	0.0226277	1.0155	0.0365654	-2.079	0.037617	0.0592492	0.329973
SMARCA4	16.3211	0.0254784	1.78066	0.0343838	-2.07895	0.0376216	0.0625309	0.330953
EIF2B1	17.1625	0.0245356	4.01456	0.000110047	-2.07815	0.0376959	0.00299086	0.283134
CLN6	9.25058	0.0197938	1.27186	0.0261656	-2.07745	0.0377604	0.0762792	0.344776
PSMD9	12.466	0.0235166	1.52632	0.0240383	-2.07707	0.037795	0.0662204	0.3355
ACTG1	37.6845	0.0326213	2.13657	0.0377916	-2.07699	0.0378022	0.0918095	0.353756
MRPL21	8.35468	0.0179266	0.935066	0.0389286	-2.07637	0.0378595	0.0803154	0.345576
PPP1R14B	5.48226	0.0107851	0.758226	0.0128546	-2.07635	0.0378619	0.0475727	0.322318
KARS	23.004	0.0290254	2.2199	0.0204896	-2.0763	0.0378662	0.0560417	0.327683
PUF60	12.7843	0.0238047	1.26822	0.0369327	-2.07565	0.0379266	0.0788503	0.345167
NDUFS3	8.60404	0.0182185	1.05458	0.025155	-2.07304	0.0381683	0.0682885	0.337205
NDUFA7	6.69253	0.0144499	0.832141	0.0343123	-2.07199	0.0382659	0.0811088	0.345576
ARL16	9.08351	0.0189666	1.00894	0.0320104	-2.07099	0.0383597	0.0688602	0.338011
COX5A	6.53988	0.0117639	1.15344	0.00174727	-2.07069	0.0383877	0.0102324	0.289464
ATPAF1	25.7708	0.0298033	2.37153	0.0198104	-2.07062	0.0383942	0.0367778	0.313508
SNRPE	7.40923	0.0151904	1.2429	0.0110731	-2.07051	0.0384048	0.0442458	0.321699
MDH1	16.0934	0.025762	2.20783	0.00951788	-2.06976	0.0384748	0.0398842	0.315788
PRELID1	9.1126	0.0208622	1.26453	0.0107164	-2.06886	0.0385597	0.0577658	0.329973
LAMC3	2.44298	0.00129402	0.509324	0.0374615	-2.0688	0.0385647	0.0809363	0.345576
NEDD8	11.9884	0.0223127	1.36675	0.0112448	-2.06723	0.0387129	0.0432373	0.320926
WDR73	23.3198	0.0301538	2.79077	0.0391975	-2.0671	0.0387247	0.0790009	0.345341
C12orf34	2.46251	0.00360182	0.723844	0.00352687	-2.06623	0.0388068	0.0358807	0.313449
CALHM1	2.13944	0.000447048	0.757448	0.010168	-2.06596	0.038832	0.0362269	0.313449
GSTP1	8.03655	0.0206791	1.00966	0.0137295	-2.06587	0.0388407	0.0798381	0.345576
PSMB1	15.6247	0.0267932	1.16178	0.0230245	-2.06538	0.0388868	0.0615197	0.329973
ZNHIT3	15.4151	0.0246709	3.01106	0.00160659	-2.06533	0.0388919	0.0112026	0.289464
TIMM10	7.19636	0.0179328	1.16904	0.00966309	-2.06246	0.0391643	0.0557265	0.327683
NDUFB5	12.7654	0.0226359	2.39002	0.00205168	-2.05929	0.0394661	0.0139814	0.297775
C1QBP	10.2802	0.0212835	1.87593	0.0128855	-2.0586	0.039533	0.0360204	0.313449
ZNF48	13.4394	0.0247972	1.63094	0.0259022	-2.05853	0.0395391	0.0574349	0.329343
C9orf93	4.58042	0.00782934	0.585363	0.0183215	-2.0574	0.0396477	0.0669348	0.335972
PGP	6.62723	0.0137814	0.869134	0.0131131	-2.05714	0.0396724	0.0520389	0.326268
C21orf33	12.3698	0.0262549	1.75791	0.00478282	-2.05624	0.0397594	0.034313	0.312129
ELAC2	18.0924	0.028425	3.18465	0.00665132	-2.05621	0.0397627	0.0215818	0.297775
MLST8	9.13226	0.0210649	1.30578	0.0184885	-2.05548	0.0398331	0.0801804	0.345576
MRPL53	8.58863	0.0188295	0.906191	0.0191552	-2.05542	0.0398385	0.060459	0.329973
EXOSC2	17.7078	0.0289181	2.51863	0.014956	-2.05525	0.039855	0.0579287	0.329973
ZFAND6	12.7074	0.0306204	3.01774	0.00240434	-2.05524	0.039856	0.00116907	0.283134
GRASP	4.00889	0.00850531	0.664181	0.00193294	-2.05523	0.0398567	0.0172308	0.297775
NDUFA8	9.98888	0.0208521	1.2518	0.00867897	-2.05477	0.0399011	0.0431111	0.320926
THAP8	10.6617	0.0227475	1.37024	0.0467672	-2.05446	0.0399308	0.0926325	0.354764
BRI3BP	5.00864	0.0131451	1.1852	0.00717958	-2.05257	0.0401146	0.0458581	0.322136
DCTPP1	6.1509	0.0144744	1.16447	0.00893771	-2.05244	0.040127	0.042256	0.319026
C22orf27	8.41835	0.0193049	1.78107	0.0181862	-2.05178	0.0401914	0.0505656	0.324265
COX8A	8.94675	0.0200682	0.98426	0.021808	-2.05142	0.0402261	0.0698884	0.338682
ENDOG	7.5725	0.0175134	0.828105	0.0139599	-2.05068	0.0402984	0.0427436	0.320566
DYSFIP1	1.75773	6.97381e-05	0.480957	0.00394106	-2.05054	0.0403116	0.0194332	0.297775
PSMA1	20.5985	0.0288074	4.19415	0.00029087	-2.04923	0.0404398	0.00182187	0.283134
NMRAL1	7.5829	0.0183787	1.00709	0.0158705	-2.04884	0.0404773	0.0783578	0.34485
NUDT22	7.72006	0.0189177	1.13258	0.00781423	-2.04881	0.040481	0.0587131	0.329973
DBI	9.23006	0.0223194	1.64683	0.0058537	-2.04752	0.0406073	0.0279031	0.305908
PMS2	25.9458	0.0323802	2.33994	0.0307262	-2.047	0.0406581	0.0701925	0.338682
HARS	18.0055	0.0281354	2.54459	0.0045215	-2.04679	0.0406784	0.0231159	0.299073
CINP	7.74583	0.0185031	1.27506	0.0149951	-2.04664	0.0406935	0.062481	0.330953
SLC25A44	14.011	0.0281671	2.40793	0.00476057	-2.0464	0.0407168	0.0242646	0.3024
ATP6V0B	10.3785	0.0255783	1.4109	0.00886459	-2.0462	0.0407368	0.0579483	0.329973
RRP1	7.27592	0.0182524	1.02528	0.0173749	-2.04415	0.0409391	0.0843556	0.34854
LRRC46	4.17386	0.00595635	0.757216	0.0490627	-2.04389	0.0409639	0.0745098	0.344345
FAM100B	6.46838	0.0157335	0.891294	0.0139389	-2.0432	0.0410331	0.06161	0.329973
APOBEC3B	3.44658	0.00737088	0.772621	0.00582235	-2.0429	0.041062	0.0317447	0.307457
SCLY	9.3628	0.0238663	2.67825	0.00506424	-2.04207	0.0411446	0.0104054	0.289464
UQCRQ	6.27313	0.0135461	0.795564	0.00518617	-2.04192	0.0411591	0.0356689	0.313449
VDAC3	18.4526	0.0290715	2.10019	0.0201946	-2.04148	0.0412033	0.0443426	0.321699
SMARCD2	9.25475	0.022485	1.44761	0.00396258	-2.0396	0.0413903	0.0401942	0.31616
IMP3	13.2362	0.026909	1.53482	0.0134486	-2.03728	0.0416215	0.057144	0.329193
NUP37	11.0248	0.0214414	2.87012	0.000556039	-2.03636	0.0417144	0.00327666	0.283134
SRL	3.02425	0.00502124	0.513295	0.0361514	-2.03573	0.0417779	0.106664	0.364379
PMVK	13.072	0.0268384	1.0387	0.0195827	-2.03567	0.0417836	0.0511206	0.325448
APRT	9.21917	0.0211637	0.843891	0.0257591	-2.03528	0.0418224	0.0702479	0.338682
CCBL1	8.26141	0.0192696	0.730206	0.0315869	-2.03424	0.0419271	0.0808719	0.345576
CLPP	9.48109	0.0223974	0.900644	0.0270746	-2.03227	0.0421268	0.0731841	0.342996
CDKN2A	4.34603	0.0114707	0.80411	0.00836652	-2.03202	0.0421514	0.0518045	0.325541
CYB5R1	11.7893	0.0249169	1.29816	0.000755425	-2.03082	0.0422736	0.00305286	0.283134
ATG4A	8.00313	0.0185752	1.99778	0.0023878	-2.03073	0.0422828	0.00962049	0.289464
LGALS7B	1.50643	0.000278403	0.236929	0.0156992	-2.03065	0.0422905	0.0574061	0.329343
MRPL52	6.09186	0.0144869	0.800726	0.0161564	-2.03058	0.0422974	0.0701686	0.338682
C18orf22	8.60794	0.0206762	1.08467	0.0324837	-2.03053	0.0423026	0.0757667	0.344506
RPUSD3	13.9062	0.0279676	1.73961	0.0153854	-2.02811	0.042549	0.0578729	0.329973
MRPL43	19.699	0.0322409	1.82449	0.0461161	-2.02773	0.0425883	0.0899589	0.352671
BOLA3	6.3471	0.0133838	1.19121	0.0146971	-2.02765	0.0425963	0.0475568	0.322318
FLYWCH2	18.0239	0.0312267	1.40394	0.0408593	-2.02755	0.0426059	0.0608085	0.329973
MRPS7	10.7188	0.0238095	1.84675	0.00124516	-2.02462	0.0429062	0.0119391	0.291291
ATP5G3	11.8449	0.0240612	1.49287	0.00705057	-2.02321	0.0430513	0.0260719	0.304762
COX5B	8.47477	0.0211839	0.945557	0.0093535	-2.02288	0.0430857	0.0481108	0.322437
SNAPIN	15.4381	0.0287343	2.39742	0.00233447	-2.0215	0.0432282	0.0125088	0.293374
TARBP2	8.09352	0.0212659	1.45224	0.0151578	-2.02138	0.0432409	0.0785505	0.345121
ARHGDIA	14.1432	0.0298989	1.49145	0.0264264	-2.02061	0.0433206	0.0952404	0.357072
COX7A2	8.05007	0.0197571	0.934193	0.0291416	-2.02045	0.043337	0.0753366	0.344345
LOC152217	7.01599	0.0176075	1.1037	0.0231784	-2.02016	0.0433669	0.0773324	0.344776
PAQR4	4.13235	0.00857064	0.764424	0.0320223	-2.01998	0.0433853	0.0826124	0.346742
LOC344967	3.22007	0.00247349	1.55361	0.00353989	-2.01992	0.0433913	0.0142728	0.297775
FIBP	9.99212	0.0239143	1.04058	0.0287027	-2.01793	0.0435985	0.0780377	0.344776
ENY2	9.24488	0.021808	1.74562	0.00766884	-2.01363	0.0440485	0.0274489	0.305524
PRMT1	13.2731	0.0300348	1.68229	0.0268249	-2.01236	0.0441821	0.0910671	0.353386
GEMIN7	7.16241	0.0207293	1.42308	0.00901876	-2.01171	0.0442503	0.0453127	0.32172
UBL7	12.6389	0.0277024	1.01546	0.0408185	-2.01134	0.044289	0.0637749	0.332998
TIMM50	9.91599	0.0245921	1.11936	0.0371064	-2.01082	0.0443441	0.0883855	0.352426
SPOCK2	11.7194	0.0268777	0.932796	0.0478519	-2.01008	0.0444224	0.0742669	0.344332
PRDX2	11.3968	0.027102	1.04921	0.0349078	-2.0095	0.0444843	0.0859754	0.35005
GPR172A	9.92748	0.026179	1.72091	0.00887651	-2.0092	0.0445164	0.0483971	0.322437
YIF1B	9.05033	0.0241344	1.15404	0.0215757	-2.0073	0.044718	0.078031	0.344776
ANKRD39	7.83384	0.0219487	1.32575	0.0196964	-2.00625	0.0448298	0.076333	0.344776
MRPL17	11.6739	0.0292446	1.90964	0.00474867	-2.00542	0.0449183	0.0341013	0.312074
FOXK2	17.5353	0.0309434	2.40886	0.00763484	-2.00325	0.0451508	0.0413004	0.316252
POLR2K	18.6598	0.0324154	2.96609	0.0116867	-2.00205	0.0452789	0.0393674	0.315397
AIMP2	8.56536	0.0219369	1.44365	0.0143558	-2.00203	0.0452811	0.0485361	0.322437
TRAP1	8.63276	0.0258916	1.32051	0.00703049	-2.00202	0.0452826	0.0620334	0.330674
COQ3	7.48663	0.0156132	1.88024	0.0102656	-2.00132	0.0453577	0.0266171	0.305155
PSMD8	12.1038	0.028798	1.35562	0.034927	-2.00113	0.0453785	0.0901507	0.352671
CHST1	3.01206	0.00332067	0.574723	0.0281948	-2.00093	0.0454003	0.0844562	0.348608
EXOSC4	6.01562	0.0170734	0.791241	0.0133803	-2.00068	0.0454267	0.0750338	0.344345
NDUFS4	17.8821	0.0339739	1.66148	0.0352687	-2.00017	0.0454814	0.08076	0.345576
NDUFA13	9.90242	0.0253112	0.782725	0.025862	-1.99959	0.0455449	0.0719941	0.340373
TUT1	23.8747	0.0358232	2.50805	0.0244695	-1.99891	0.0456181	0.0612485	0.329973
ADAD2	2.45238	0.00148188	0.816178	0.0349362	-1.99749	0.0457724	0.0776615	0.344776
NDUFB10	7.52774	0.0214017	0.859003	0.0185827	-1.99586	0.045949	0.0811326	0.345576
RBM34	9.76319	0.0243403	1.778	0.00795834	-1.99582	0.045953	0.0305937	0.307457
EIF2B2	14.9395	0.030454	1.94195	0.0238826	-1.99426	0.0461237	0.0706989	0.338793
ADCK4	19.4558	0.0347199	1.68335	0.0461366	-1.99338	0.0462193	0.0754347	0.344345
OR2B6	1.47245	0.000303174	0.609782	0.0359366	-1.99181	0.0463919	0.071939	0.340365
MED27	7.43067	0.0194661	0.850431	0.0208773	-1.98954	0.0466414	0.065114	0.333722
NDUFA6	10.114	0.0255547	1.14274	0.0147186	-1.98948	0.0466487	0.0525076	0.32652
PMPCA	10.5303	0.0280112	1.43097	0.0249731	-1.9873	0.046889	0.096235	0.357505
POP5	7.21881	0.018954	1.19202	0.0108507	-1.98691	0.0469323	0.0459207	0.322136
PIGU	17.112	0.0340564	1.40649	0.0487539	-1.98645	0.0469838	0.0561633	0.327683
MDP1	7.58813	0.0208151	1.34659	0.00203675	-1.98531	0.0471099	0.0176354	0.297775
KLHDC8A	2.40075	0.00102735	0.682094	0.00624848	-1.98513	0.0471304	0.0364844	0.313508
GLRX3	10.3344	0.0256687	1.71113	0.0351017	-1.98497	0.0471475	0.0790429	0.345341
MRPS34	7.20899	0.0213798	0.889188	0.0221699	-1.98447	0.047203	0.0903622	0.352788
SRPRB	11.194	0.0353923	2.59052	0.00356415	-1.98434	0.047218	0.0154358	0.297775
ALKBH3	13.7412	0.0316892	1.34737	0.0379972	-1.97969	0.0477382	0.0741893	0.344165
ASH2L	31.3824	0.0392613	2.39614	0.0271772	-1.97911	0.0478032	0.0421785	0.319026
MRPS35	10.7097	0.027465	2.47921	0.000240405	-1.97762	0.0479711	0.00663449	0.283134
CKS1B	5.94939	0.0168709	0.82328	0.0223201	-1.97761	0.0479724	0.079861	0.345576
CCDC19	2.8555	0.00234449	0.564972	0.0162752	-1.97695	0.0480476	0.0583703	0.329973
MRPS11	8.12787	0.0225946	1.21587	0.00607891	-1.97689	0.0480538	0.0361383	0.313449
TMX2	20.059	0.0384068	2.93059	0.0178983	-1.97664	0.0480827	0.0717283	0.340311
PUS1	6.59777	0.0206583	1.42428	0.00597167	-1.97628	0.0481236	0.0296782	0.30714
WIBG	10.793	0.028421	1.73616	0.0140336	-1.97621	0.0481305	0.0545907	0.327683
CCDC85B	5.77764	0.0169913	0.639746	0.0145945	-1.97436	0.0483406	0.0637068	0.332998
GRPEL1	10.8405	0.0279207	2.58168	0.000441698	-1.97377	0.0484081	0.00291933	0.283134
CAMKK1	6.43791	0.0200195	0.978556	0.00393385	-1.97225	0.0485807	0.0131409	0.296851
RPUSD1	6.57921	0.0204769	0.994767	0.0310252	-1.97176	0.0486375	0.096514	0.357936
NDUFV3	19.0636	0.0361905	1.76181	0.0265868	-1.97137	0.0486813	0.0455579	0.32172
COMMD5	16.43	0.0368051	1.9609	0.0257009	-1.97101	0.0487228	0.111291	0.366621
MYO1A	2.60004	0.00177573	0.623027	0.0153661	-1.97068	0.048761	0.0480478	0.322437
MRPS18B	32.4119	0.0420905	2.78447	0.0376826	-1.96884	0.0489718	0.0642955	0.333388
PSMA5	9.73098	0.0259392	1.29748	0.017307	-1.96855	0.0490053	0.0568654	0.328529
RPS26	9.74043	0.0284984	1.40097	0.00312525	-1.96663	0.0492265	0.0108058	0.289464
SLC35A4	17.2481	0.0347585	2.09187	0.00643407	-1.96655	0.0492352	0.0403061	0.31616
TCEB2	6.70155	0.0202393	0.671632	0.0246085	-1.96538	0.0493699	0.0894219	0.352671
DDA1	14.9312	0.0338097	1.72591	0.0267484	-1.96518	0.0493936	0.0703992	0.338682
GPN1	14.8825	0.0329794	2.9698	0.0173926	-1.96498	0.0494171	0.0421883	0.319026
TMEM177	9.4861	0.0252969	1.8009	0.0129867	-1.96486	0.049431	0.0545152	0.327683
CARS	8.66134	0.0306203	2.10758	0.0092562	-1.96304	0.0496414	0.0562847	0.327683
C20orf24	8.606	0.0240384	1.73898	0.0101827	-1.96264	0.049688	0.0371193	0.313508
C14orf119	12.721	0.0317568	2.33021	0.00439558	-1.96249	0.0497054	0.0262102	0.304871
C16orf13	6.48148	0.020103	0.639666	0.0427979	-1.96212	0.049748	0.0936836	0.355271
BOLA1	9.34789	0.0260881	1.45106	0.00889231	-1.96125	0.0498497	0.0374466	0.313508
SOCS1	5.354	0.0158174	0.642701	0.0268048	-1.96112	0.0498647	0.0658875	0.33497
RABEPK	8.31692	0.0242048	1.4082	0.013426	-1.96111	0.0498659	0.0537218	0.327683
TRMT12	14.2061	0.0343906	3.12526	0.013488	-1.96095	0.0498844	0.0597878	0.329973
CST4	2.18176	0.00125254	0.450748	0.00666486	-1.96033	0.0499568	0.0454644	0.32172
LZTR1	-30.2541	0.0498813	-2.89494	0.0293007	2.02359	0.0430123	0.0936062	0.355216
ZNF343	-30.4815	0.0496383	-3.4151	0.00587267	2.03338	0.042014	0.0334539	0.310718
ZFP62	-25.0262	0.0449246	-2.82027	0.0248082	2.07984	0.0375404	0.0495581	0.323815
EIF4EBP2	-15.6766	0.0469302	-3.14296	0.00150229	2.09163	0.0364713	0.0100863	0.289464
ZNF808	-27.8309	0.0437666	-3.80094	0.0143058	2.09806	0.0358995	0.0185827	0.297775
GUSBP1	-23.532	0.0439365	-2.44911	0.0365803	2.10735	0.0350869	0.0414677	0.317138
FCHSD2	-15.6251	0.0492593	-1.80598	0.0123341	2.10787	0.0350423	0.0539397	0.327683
RLIM	-34.0332	0.0418413	-2.46941	0.00247057	2.1079	0.0350398	0.0108772	0.289464
LSM11	-18.8534	0.0444799	-2.32565	0.0399069	2.11233	0.0346583	0.0929173	0.354861
ZSCAN22	-17.5682	0.0461886	-2.34371	0.0436978	2.11442	0.0344798	0.0517115	0.325448
SH3GLB1	-15.727	0.0467038	-2.38062	0.0184009	2.11569	0.034371	0.0682644	0.337187
TPM4	-14.9239	0.0485287	-1.55125	0.0267882	2.12463	0.0336178	0.0467625	0.322136
USP34	-17.6281	0.0449125	-1.69599	0.0307368	2.12549	0.033546	0.0649369	0.333424
CREBBP	-12.0123	0.0494838	-1.93496	0.0140679	2.12622	0.0334846	0.0504599	0.324265
IFNAR1	-26.2344	0.041114	-2.74766	0.0219304	2.12706	0.0334153	0.0682603	0.337187
RPGR	-15.7851	0.0459656	-1.13113	0.0392593	2.13206	0.0330021	0.0376073	0.313508
FAM178A	-14.9839	0.0446719	-2.3189	0.00763162	2.13355	0.0328799	0.0360866	0.313449
TTYH3	-13.273	0.0494126	-2.20724	0.00273613	2.14232	0.0321676	0.0138155	0.297775
ZNF506	-27.7677	0.0391608	-3.3895	0.0121885	2.143	0.0321135	0.0274597	0.305524
ZNF160	-11.0739	0.0484536	-1.96787	0.0174377	2.14543	0.0319185	0.0610319	0.329973
PCNP	-13.5543	0.0456052	-1.8301	0.0148589	2.1512	0.0314606	0.0591266	0.329973
GATAD1	-15.1212	0.0446886	-1.69346	0.00521236	2.1534	0.0312869	0.020609	0.297775
PRKAG2	-14.1441	0.0458362	-1.1858	0.0408681	2.15398	0.0312414	0.0637468	0.332998
2020-09-07	-9.57497	0.0484714	-1.51819	0.0153248	2.15598	0.0310853	0.0836731	0.348021
MED14	-17.6447	0.0427064	-1.4673	0.0185039	2.15751	0.0309658	0.0279135	0.305908
ZNF142	-16.6427	0.0420319	-3.08668	0.00931644	2.1589	0.0308579	0.0405209	0.31622
LSM14A	-16.4989	0.0390104	-2.80389	0.00371348	2.15901	0.0308498	0.0183119	0.297775
PCNX	-14.2542	0.0431089	-2.30886	0.0107453	2.1598	0.0307885	0.0361794	0.313449
LOC493754	-29.8147	0.0348951	-5.21597	0.00191839	2.16464	0.0304151	0.00432653	0.283134
KHNYN	-28.9564	0.0367468	-1.80077	0.0391066	2.16722	0.0302181	0.0364133	0.313508
KIAA0430	-16.8959	0.0417814	-2.04915	0.0175433	2.16857	0.0301151	0.045558	0.32172
NHLRC3	-12.9321	0.0447403	-1.30979	0.0288132	2.16968	0.0300308	0.0628258	0.331704
USP9X	-17.0897	0.0415721	-1.48934	0.0271676	2.17044	0.0299735	0.046567	0.322136
CCDC52	-19.2913	0.0405437	-1.34353	0.0358936	2.17183	0.0298688	0.0149338	0.297775
PRPF39	-24.8965	0.037047	-1.70215	0.046339	2.17254	0.0298147	0.0411132	0.316252
GFPT1	-13.9573	0.0439484	-1.17009	0.0332236	2.17679	0.0294966	0.0375965	0.313508
DNAJC25	-10.5244	0.0496233	-2.19233	0.00226473	2.17838	0.0293776	0.0175891	0.297775
PHF13	-10.4032	0.0477337	-2.18097	0.00390097	2.18299	0.0290363	0.0182295	0.297775
CCDC146	-10.497	0.0488356	-1.04873	0.0359335	2.18528	0.0288686	0.0411585	0.316252
SRRM2	-15.2371	0.0412354	-1.61463	0.0251498	2.18573	0.028835	0.0594232	0.329973
FAM126B	-13.0039	0.0423275	-2.42347	0.00720607	2.19728	0.0280004	0.0249725	0.302706
ZNF75D	-8.12782	0.0494759	-1.41444	0.0102354	2.19919	0.0278648	0.0599375	0.329973
CLCN5	-9.3367	0.0496551	-1.19522	0.0145064	2.20466	0.0274782	0.0337343	0.311262
CHPT1	-8.18925	0.0488525	-1.17444	0.0399853	2.20932	0.0271524	0.0757782	0.344506
PIKFYVE	-12.8613	0.0413651	-0.88789	0.0463679	2.21723	0.0266073	0.0289279	0.30714
FAM125B	-13.1138	0.0419948	-1.94405	0.000168997	2.21809	0.0265484	0.00246964	0.283134
ZNF780A	-10.8684	0.0442123	-2.83263	0.00172355	2.225	0.0260813	0.00907486	0.289464
TBRG1	-24.4986	0.0325199	-2.84647	0.0296749	2.22826	0.025863	0.0475961	0.322318
SEMA4C	-10.4525	0.0457582	-0.727549	0.0128714	2.22974	0.0257644	0.0344625	0.312129
MAGT1	-10.7591	0.0420042	-1.67416	0.0101106	2.22987	0.0257558	0.0489975	0.322598
PRCP	-11.8038	0.042911	-1.29028	0.0141766	2.23091	0.025687	0.0555762	0.327683
MLL4	-26.3817	0.0308961	-2.89595	0.0109991	2.23854	0.0251858	0.0444656	0.321699
ABCC5	-10.6039	0.0424904	-1.48431	0.0119198	2.23913	0.0251476	0.0381463	0.313508
ANKRD42	-9.99341	0.0455617	-1.37865	0.012271	2.24092	0.025031	0.025848	0.303818
FLJ45340	-8.82899	0.0455284	-1.16418	0.0153432	2.2452	0.0247552	0.0455602	0.32172
C22orf46	-8.95815	0.0465037	-1.7197	0.00469791	2.24983	0.0244599	0.0296367	0.30714
ABCC10	-9.06227	0.0462596	-2.03483	0.000973804	2.25047	0.0244193	0.00326365	0.283134
MBTPS1	-9.33176	0.0414686	-1.73277	0.00273826	2.25047	0.0244189	0.0191228	0.297775
NCOA1	-9.05657	0.0417674	-1.82131	0.00310118	2.25493	0.0241375	0.0205073	0.297775
PILRB	-19.7809	0.0316512	-1.85049	0.0317315	2.25818	0.0239346	0.0765308	0.344776
PHF3	-7.02596	0.0471959	-1.2037	0.00493641	2.25824	0.0239305	0.0352036	0.313449
EP300	-7.7239	0.0465127	-1.30642	0.00611822	2.2642	0.0235621	0.0299139	0.30714
ZFP36L1	-14.6744	0.0357232	-0.984038	0.0210778	2.26882	0.0232793	0.0279431	0.305908
ZNF507	-9.94251	0.0399859	-1.96496	0.00376503	2.26913	0.0232607	0.0185588	0.297775
SEL1L	-10.9212	0.0389741	-1.07661	0.047573	2.27061	0.0231708	0.0492327	0.323175
GPATCH2	-21.3448	0.0298694	-2.18427	0.0445648	2.27722	0.0227732	0.0500526	0.324265
POFUT2	-8.73918	0.044365	-1.41468	0.00683828	2.27757	0.0227521	0.0301738	0.307326
ZNF654	-8.21238	0.0401183	-1.95954	0.00578889	2.27949	0.022638	0.0297968	0.30714
FAM84B	-9.96665	0.0400748	-0.79738	0.0390476	2.28332	0.0224118	0.0331558	0.310054
DNAJB9	-7.94941	0.045536	-1.27618	0.0162094	2.28536	0.0222914	0.0425235	0.319315
PPP1R15A	-9.26721	0.0416565	-1.20388	0.0176247	2.28678	0.0222089	0.0535714	0.327683
LOC729678	-15.9008	0.0313296	-2.7166	0.00714065	2.28754	0.0221646	0.0408877	0.316249
TMTC3	-18.028	0.0306421	-1.26069	0.0484019	2.29001	0.0220208	0.0367241	0.313508
MKLN1	-10.4472	0.0362775	-1.83086	0.0146681	2.29146	0.0219367	0.0532267	0.326905
LOC100130093	-8.6464	0.0406511	-1.18287	0.0487368	2.29453	0.0217598	0.0586577	0.329973
RINL	-11.3783	0.0381061	-1.76868	0.00110778	2.29561	0.021698	0.00813341	0.289464
GNAQ	-9.21802	0.0393429	-1.92118	0.00873367	2.29742	0.0215949	0.0272645	0.305524
TWSG1	-7.16448	0.0495613	-1.09706	0.00522019	2.30039	0.0214262	0.0186734	0.297775
FOXN2	-9.37506	0.0384186	-1.24538	0.0271274	2.30757	0.0210232	0.0472902	0.322318
ARGLU1	-22.0215	0.0271709	-1.7563	0.0401721	2.31	0.0208879	0.0683455	0.337382
LOC91316	-11.2421	0.0355789	-1.36402	0.0121393	2.31002	0.0208871	0.0271283	0.30548
CA5B	-7.95434	0.0439061	-1.20465	0.0264914	2.31205	0.020775	0.0302389	0.307326
EPS15	-19.5935	0.0286266	-1.7823	0.0285063	2.31414	0.0206599	0.0376474	0.313508
EHHADH	-8.02831	0.0437698	-0.997838	0.0173561	2.31519	0.0206024	0.0278935	0.305908
NFIB	-9.17478	0.0380488	-1.38379	0.000808398	2.31603	0.0205567	0.00284459	0.283134
PAPSS1	-8.27883	0.0390103	-1.30394	0.00698667	2.3196	0.0203626	0.0369322	0.313508
CRYL1	-8.19656	0.0363491	-1.8744	0.000705931	2.32056	0.0203105	0.00253981	0.283134
CADPS2	-6.69859	0.0453394	-0.56772	0.0292579	2.32334	0.020161	0.0360722	0.313449
DUSP18	-12.7173	0.0322342	-2.1229	0.017569	2.32484	0.0200804	0.0381102	0.313508
SEPT7P2	-9.00285	0.036855	-2.30332	3.26431e-05	2.32592	0.020023	0.00148142	0.283134
ZNF33A	-15.9288	0.0297704	-1.94947	0.0128783	2.32644	0.0199949	0.0259157	0.303818
CPEB4	-7.14304	0.0439157	-0.687663	0.0400713	2.33076	0.0197658	0.0383365	0.313508
USP45	-11.3052	0.0340175	-0.979313	0.0468447	2.3308	0.0197637	0.0281281	0.306373
KIAA0284	-9.53869	0.0362476	-0.779562	0.014756	2.33146	0.0197289	0.0412184	0.316252
ACADSB	-17.5988	0.0283216	-1.20161	0.0443017	2.33259	0.0196699	0.0234205	0.299073
PRKAR2B	-6.75448	0.0498938	-1.45618	0.000677517	2.3327	0.0196638	0.00440257	0.283134
WASL	-6.78456	0.0426144	-1.34113	0.0134805	2.33273	0.0196622	0.0464136	0.322136
NKTR	-6.96957	0.0430403	-0.93851	0.0120065	2.33275	0.0196612	0.0423275	0.319026
TIRAP	-7.59056	0.0444382	-1.29039	0.00768177	2.34277	0.0191411	0.0194657	0.297775
SYNPO2	-7.37434	0.0467343	-0.815859	0.00184945	2.34494	0.0190302	0.0111862	0.289464
PTPRJ	-7.80326	0.0419712	-0.789708	0.0359243	2.34602	0.0189751	0.0431552	0.320926
ZNF841	-7.5623	0.041564	-1.22537	0.0204166	2.34838	0.0188554	0.0297458	0.30714
TAB3	-18.7928	0.0268656	-1.71618	0.004425	2.34975	0.0187862	0.014462	0.297775
FAM127C	-6.98444	0.043939	-0.785842	0.0348404	2.35077	0.0187344	0.052628	0.32652
ZNF167	-3.54871	0.0485823	-1.41105	0.000185617	2.35197	0.018674	0.00287749	0.283134
PCDHGC3	-6.27878	0.0380817	-1.28574	0.00220678	2.35202	0.0186719	0.00659557	0.283134
CAPRIN2	-7.01879	0.0400044	-1.5906	0.00840563	2.35493	0.0185264	0.0361763	0.313449
ID2	-11.9587	0.0315452	-1.09157	0.020244	2.35813	0.0183672	0.0233728	0.299073
INPP5D	-15.5712	0.0270551	-1.35439	0.0288215	2.36644	0.0179602	0.0549939	0.327683
TMEM63A	-24.3053	0.0235802	-1.99276	0.0151468	2.36664	0.0179504	0.0286023	0.30714
PPARA	-12.9289	0.0296335	-1.67163	0.00800889	2.37026	0.0177758	0.0187423	0.297775
KIAA0240	-6.10132	0.0433934	-1.31946	0.00588896	2.37077	0.0177512	0.0268323	0.305155
ZNF577	-9.5189	0.0342827	-1.67018	0.00202433	2.37095	0.0177425	0.00867148	0.289464
TMEM168	-25.1724	0.0225623	-1.88178	0.0191742	2.37695	0.0174563	0.0200134	0.297775
ZFP14	-10.0974	0.0310003	-1.80328	0.00735179	2.37887	0.0173657	0.0291014	0.30714
FAM156A	-12.3225	0.0296673	-1.60374	0.0127158	2.37922	0.0173495	0.026742	0.305155
C10orf12	-6.73661	0.0404676	-1.03771	0.0417144	2.38265	0.0171886	0.036282	0.313508
RNF19A	-11.3501	0.0306916	-0.819554	0.0429806	2.38331	0.0171578	0.0252577	0.302706
PAIP2B	-11.5766	0.0301909	-1.30345	0.0204751	2.38404	0.0171239	0.019536	0.297775
KLHL9	-16.3242	0.0250105	-2.37399	0.00303229	2.38429	0.0171122	0.0131267	0.296851
NELF	-11.7901	0.0291371	-1.66174	0.00497528	2.39267	0.0167263	0.0197257	0.297775
STX7	-7.37386	0.0386235	-1.3593	0.00832949	2.39441	0.0166472	0.0264939	0.305155
ZNF649	-7.21446	0.0375696	-1.58762	0.000579028	2.39737	0.0165132	0.00593822	0.283134
L3MBTL3	-7.69401	0.0382874	-1.57699	0.000431409	2.40268	0.0162754	0.00505939	0.283134
FTO	-7.47434	0.0329111	-1.79951	0.00362058	2.40268	0.0162752	0.0153887	0.297775
LENG8	-14.7046	0.0259156	-1.47626	0.00382697	2.40408	0.0162131	0.0216439	0.297775
UBN2	-8.82959	0.0305384	-1.53081	0.00518334	2.40822	0.0160305	0.0309473	0.307457
BRAF	-10.75	0.028479	-1.49247	0.020498	2.40902	0.0159952	0.0258013	0.303625
PTPN12	-14.288	0.0262074	-1.26349	0.0233034	2.41007	0.0159495	0.0215349	0.297775
SIAH1	-10.2722	0.0270574	-2.07353	0.0104691	2.41104	0.0159072	0.0499652	0.324196
ZNF251	-7.30252	0.0358651	-2.12496	0.00121218	2.41591	0.0156961	0.0054647	0.283134
ZNF383	-21.8656	0.0219149	-2.57858	0.0163244	2.41667	0.015663	0.0149923	0.297775
KIAA0494	-10.8504	0.0281093	-1.5492	0.00579531	2.41713	0.0156433	0.0280811	0.306191
TMEM159	-10.0467	0.0278601	-1.07784	0.0413983	2.41957	0.0155388	0.060972	0.329973
AIF1L	-7.69638	0.0363461	-1.00181	0.00786169	2.42185	0.0154417	0.0244622	0.3024
RUFY2	-8.41863	0.0273045	-2.02174	0.00361462	2.42381	0.0153587	0.0250784	0.302706
MBD5	-6.93846	0.0326727	-1.55904	0.00675598	2.42434	0.0153363	0.0356131	0.313449
ZNF136	-4.5819	0.0463595	-1.05868	0.00695329	2.42522	0.0152989	0.044482	0.321699
TXNDC5	-8.88809	0.0301708	-1.16122	0.0122658	2.42557	0.0152842	0.0408452	0.316249
APLP2	-7.24983	0.0298799	-1.13644	0.00384488	2.42696	0.0152258	0.0164119	0.297775
TLN1	-11.4507	0.0266894	-2.07904	0.00225327	2.43048	0.015079	0.0159353	0.297775
SMC5	-22.7145	0.0202042	-3.01114	0.00351917	2.4312	0.0150491	0.00784896	0.289464
ZNF234	-12.0295	0.0261744	-1.93791	0.00456011	2.43144	0.0150387	0.0168769	0.297775
TRIM66	-17.8286	0.021867	-1.69713	0.0157323	2.43165	0.0150303	0.0151211	0.297775
LOC100131434	-6.47279	0.0401621	-1.20465	0.00497042	2.43245	0.0149972	0.013146	0.296851
APLF	-15.4378	0.022356	-1.78846	0.0352844	2.43315	0.0149682	0.0393913	0.315436
ZBTB34	-6.54993	0.0354011	-1.46229	0.00473798	2.43699	0.0148101	0.0288684	0.30714
CHIC1	-13.7168	0.023965	-1.31183	0.0492271	2.43709	0.0148058	0.0200856	0.297775
CES2	-11.5742	0.0241889	-3.49414	0.000187919	2.43885	0.0147339	0.00107688	0.283134
TTC14	-11.849	0.0260971	-1.37019	0.00712245	2.44098	0.0146474	0.016781	0.297775
ZNF37B	-12.8133	0.0248532	-1.37084	0.00545817	2.44473	0.0144961	0.0180986	0.297775
PER2	-7.80711	0.0308017	-1.73085	0.00063148	2.4451	0.0144812	0.00600905	0.283134
SHROOM4	-5.40081	0.0425719	-1.13823	0.00700074	2.44781	0.0143728	0.0216027	0.297775
FBLIM1	-7.11974	0.0340368	-0.721626	0.0300131	2.45097	0.0142473	0.0541473	0.327683
ZNF510	-10.5548	0.0249096	-2.01917	0.00386422	2.45396	0.0141291	0.0202354	0.297775
ZBTB38	-7.08405	0.0361586	-0.694976	0.0177971	2.45555	0.0140669	0.0186443	0.297775
TES	-20.4696	0.0198325	-1.93252	0.0265573	2.45592	0.0140523	0.0388384	0.314345
RBM41	-16.07	0.0217917	-1.35742	0.0440166	2.4571	0.0140065	0.00658288	0.283134
ZC3H6	-8.355	0.0272584	-1.84711	0.00748874	2.45952	0.0139124	0.0361477	0.313449
LOC100272228	-7.07877	0.0345373	-1.17918	0.00699268	2.46232	0.013804	0.0162658	0.297775
PQLC3	-5.41365	0.0424863	-1.34305	0.0029045	2.46537	0.0136873	0.0190278	0.297775
NFAT5	-5.08662	0.0421738	-1.07003	0.00218297	2.46816	0.0135808	0.0105698	0.289464
NAPEPLD	-13.0707	0.0213763	-2.57977	0.00126182	2.46885	0.0135549	0.0109971	0.289464
ZNF117	-11.6129	0.0246197	-1.19872	0.00489117	2.46945	0.0135323	0.0140162	0.297775
ZNF12	-9.12911	0.0255071	-1.65835	0.00241473	2.47103	0.0134724	0.0209194	0.297775
GCH1	-13.3535	0.0223533	-1.28253	0.0288434	2.4741	0.0133571	0.0317134	0.307457
PHF15	-21.8253	0.0178381	-1.14273	0.035272	2.48331	0.0130166	0.0350084	0.313425
SGK3	-4.58635	0.0459402	-1.17738	0.00241906	2.48825	0.0128372	0.0154725	0.297775
ATP8B1	-4.77576	0.049056	-0.562651	0.00392148	2.49106	0.0127362	0.0101391	0.289464
PRDM2	-20.4966	0.0180571	-2.61128	0.00174461	2.49302	0.0126663	0.0105358	0.289464
EIF4ENIF1	-13.3131	0.0196783	-2.56866	0.00394401	2.49304	0.0126655	0.0269027	0.305155
ZNF630	-8.36249	0.0296333	-0.91825	0.0398893	2.49317	0.0126607	0.0122611	0.292542
RYBP	-16.4193	0.018253	-2.52199	0.00171876	2.49589	0.012564	0.0128694	0.294902
THRA	-5.57135	0.0342165	-1.39877	0.00283115	2.49863	0.0124675	0.00618848	0.283134
ZNF514	-5.93812	0.0377825	-1.31095	0.000523869	2.50008	0.0124164	0.00583552	0.283134
KIAA0355	-7.40736	0.0286998	-1.8304	0.00213644	2.50499	0.0122455	0.00979989	0.289464
MTMR3	-8.9695	0.0238667	-1.64231	0.00333759	2.50836	0.0121291	0.0235089	0.299073
OTUD1	-7.91147	0.028927	-1.44851	0.00410054	2.51189	0.0120086	0.0124148	0.292814
RASGRP3	-5.14874	0.0369811	-0.833816	0.0472929	2.51368	0.0119478	0.0563304	0.327683
HIC2	-9.0751	0.0203486	-2.33729	0.000396285	2.51542	0.0118891	0.00425602	0.283134
HSPG2	-14.7102	0.0193581	-1.04167	0.00968842	2.5166	0.0118494	0.0248233	0.302706
ZNF442	-3.63796	0.0435194	-1.48019	0.00151871	2.52506	0.011568	0.0107934	0.289464
TBC1D4	-10.3019	0.0225103	-0.724615	0.0261064	2.53061	0.0113864	0.019214	0.297775
ZNF441	-4.18642	0.0413294	-1.09335	0.00401952	2.53068	0.0113843	0.0298916	0.30714
ZNF616	-6.59306	0.0274382	-2.30229	0.000507513	2.53115	0.0113691	0.001806	0.283134
CCDC126	-7.56869	0.0277917	-1.88554	0.00284443	2.5313	0.0113642	0.0106541	0.289464
ZNF275	-16.2542	0.0180162	-1.34131	0.0498908	2.53209	0.0113384	0.0216858	0.297775
AHSA2	-13.9046	0.0187329	-1.31635	0.00948438	2.53651	0.0111964	0.0202387	0.297775
KCND1	-8.05055	0.0273662	-0.980292	0.0277251	2.53839	0.0111364	0.0161469	0.297775
NOTCH4	-11.5343	0.0205654	-1.48277	0.00510048	2.54071	0.0110628	0.0267493	0.305155
C7orf42	-28.3535	0.0141388	-4.42703	0.000772343	2.54607	0.0108943	0.00868235	0.289464
ZNF525	-26.0456	0.0146485	-2.28501	0.018568	2.54835	0.0108233	0.00833907	0.289464
ZNF607	-10.9863	0.0181615	-3.0504	0.00136825	2.55439	0.0106373	0.0105921	0.289464
BHLHB9	-4.69546	0.0346167	-1.35544	0.0078795	2.55633	0.0105783	0.026473	0.305155
ZNF780B	-6.65163	0.0284092	-1.46202	0.000679763	2.55876	0.0105047	0.00931226	0.289464
BACE1	-4.94701	0.0382909	-1.57362	0.000531565	2.55911	0.0104942	0.000947655	0.283134
KIF1B	-13.1123	0.0182572	-0.928213	0.0422983	2.56146	0.0104234	0.0319351	0.308215
ZNF197	-15.7212	0.0152536	-4.05226	0.000298417	2.56365	0.0103579	0.00172412	0.283134
COBLL1	-4.28609	0.0404732	-0.981279	0.00528278	2.56444	0.0103342	0.0146506	0.297775
TRIM32	-9.7726	0.018364	-1.98834	0.00228873	2.56484	0.0103225	0.0178508	0.297775
NEDD9	-12.9327	0.0173793	-2.10993	0.000773698	2.56687	0.0102622	0.00242574	0.283134
TPMT	-22.3557	0.0141525	-1.92574	0.0475941	2.56725	0.0102508	0.0353875	0.313449
TTLL11	-10.4481	0.019164	-3.33811	0.000118707	2.57555	0.0100081	0.000842925	0.283134
ZNF187	-7.74075	0.0231588	-2.04706	0.00146797	2.58395	0.00976748	0.0104203	0.289464
ERMAP	-5.83053	0.0307705	-1.44919	0.00304359	2.58449	0.0097522	0.0144029	0.297775
ABCB1	-4.95625	0.0387853	-0.883894	0.0112974	2.58623	0.00970311	0.0143528	0.297775
HLCS	-27.1766	0.0125316	-1.66889	0.036425	2.5874	0.00967023	0.024949	0.302706
GPRASP2	-3.49984	0.0398663	-0.977921	0.00232143	2.59174	0.00954925	0.0161336	0.297775
ZNF587	-13.6312	0.0167355	-1.73576	0.0041843	2.5925	0.00952822	0.00979817	0.289464
GRINL1A	-9.4178	0.0187159	-2.04693	0.0051227	2.60048	0.00930935	0.0189113	0.297775
PI4KAP2	-4.5687	0.0293896	-1.17954	0.00144782	2.60688	0.0091371	0.0145218	0.297775
ZNF260	-18.1827	0.0138337	-2.89808	0.000804198	2.6148	0.00892801	0.00490557	0.283134
C5orf53	-5.75714	0.030389	-1.66407	0.000593145	2.6169	0.00887319	0.00330491	0.283134
SPRY1	-5.08558	0.0330765	-0.961875	0.000860802	2.61931	0.0088108	0.0051674	0.283134
HERPUD1	-12.5481	0.0156944	-1.35545	0.02602	2.62005	0.00879178	0.0340258	0.312019
RGAG4	-4.37385	0.0433189	-0.932407	0.000197418	2.62037	0.00878348	0.00151775	0.283134
NT5C2	-9.0119	0.0173264	-1.80341	0.00212111	2.6252	0.00865974	0.0119372	0.291291
RNPC3	-6.01412	0.0242922	-1.35051	0.00806057	2.62953	0.00855019	0.0267354	0.305155
ZNF70	-5.1436	0.0312576	-1.71719	0.000555296	2.63177	0.00849402	0.00281941	0.283134
RFX3	-8.01047	0.0210417	-1.01351	0.0244153	2.64395	0.00819454	0.00870929	0.289464
FLJ43663	-5.90509	0.024271	-1.07564	0.0328839	2.64473	0.0081757	0.0380175	0.313508
RBM5	-22.4032	0.0106544	-3.24663	0.000192561	2.64553	0.00815638	0.00316968	0.283134
ZNF624	-6.06247	0.0203892	-1.77727	0.00315202	2.65075	0.0080314	0.0170507	0.297775
CROCCL2	-5.14064	0.0310017	-1.63391	2.77092e-05	2.66666	0.00766093	0.000802282	0.283134
FSCN1	-14.6864	0.0124649	-1.41945	0.0155178	2.6689	0.00760992	0.0363843	0.313508
EYA4	-2.61531	0.0417584	-0.92744	0.000448714	2.67805	0.00740512	0.00288493	0.283134
AGBL2	-8.85899	0.0183069	-1.08992	0.043523	2.68021	0.00735758	0.00569832	0.283134
TOB1	-20.804	0.0106353	-0.848102	0.0247953	2.68371	0.00728103	0.00633477	0.283134
IFRD1	-26.3905	0.0102159	-2.66924	0.002017	2.68478	0.00725779	0.0040578	0.283134
KLF8	-4.58382	0.0295459	-1.07635	0.00812426	2.68834	0.00718084	0.0215056	0.297775
DISC1	-4.06815	0.0334354	-1.25699	0.0056184	2.69917	0.00695128	0.0183375	0.297775
ICA1L	-4.29296	0.0218342	-1.68385	3.71849e-05	2.70411	0.00684871	0.000437211	0.283134
SERINC4	-6.0538	0.02445	-1.52714	0.00176246	2.70454	0.00683992	0.0061739	0.283134
GALNT4	-10.6345	0.0147447	-0.838915	0.0441264	2.70492	0.006832	0.00878839	0.289464
SLC35E1	-29.4481	0.00888832	-1.62049	0.0306206	2.70901	0.00674848	0.0245569	0.302655
MFN1	-33.4573	0.00846961	-1.92296	0.0379149	2.71993	0.00652951	0.00497023	0.283134
FLJ45445	-3.25859	0.0399223	-0.669762	0.030919	2.72401	0.00644939	0.0251017	0.302706
PNRC1	-22.4085	0.00931863	-1.93208	0.0204788	2.72526	0.00642511	0.0248691	0.302706
PDXDC1	-33.8447	0.00813094	-1.46896	0.016072	2.73274	0.00628094	0.00684954	0.283134
SOX9	-3.90659	0.038774	-0.395055	0.00552287	2.74371	0.00607485	0.0102282	0.289464
CYSLTR1	-2.87531	0.0457189	-0.717218	0.042554	2.74508	0.00604962	0.0337271	0.311262
SKAP2	-13.084	0.0111266	-0.907636	0.037472	2.75053	0.00594991	0.00424075	0.283134
CHRFAM7A	-3.11355	0.0472443	-0.707036	0.00808948	2.75088	0.00594346	0.0175911	0.297775
PDP1	-6.83035	0.0156298	-1.52792	0.00185415	2.75273	0.00591006	0.00981244	0.289464
ZNF594	-7.03927	0.0151263	-1.58517	0.00192433	2.77373	0.00554176	0.0111503	0.289464
MYNN	-21.27	0.00807569	-2.06545	0.0481418	2.77397	0.00553766	0.0225468	0.297775
CG030	-7.77619	0.0146129	-1.46984	0.0225244	2.78016	0.00543315	0.0150332	0.297775
ZNF470	-5.00301	0.0157193	-1.85764	0.000195067	2.7857	0.00534129	0.00123413	0.283134
PDGFD	-4.72192	0.0236168	-0.868024	0.0110127	2.78579	0.00533976	0.0192064	0.297775
SGK2	-3.45967	0.0393461	-1.0447	0.0159062	2.80451	0.00503935	0.0069698	0.283134
LOH12CR2	-4.34485	0.0214565	-1.78781	0.00393771	2.81264	0.00491367	0.015352	0.297775
SERPINB9	-10.6854	0.0118371	-1.20893	0.00225787	2.81569	0.00486733	0.00531725	0.283134
TEX9	-7.68357	0.0146787	-0.61435	0.0489066	2.81634	0.00485744	0.00488032	0.283134
RPL32P3	-16.8615	0.00847027	-2.40299	0.00100327	2.81966	0.00480745	0.00341581	0.283134
TBC1D8	-12.1108	0.00992508	-0.695553	0.0385885	2.82515	0.00472592	0.00391305	0.283134
MYO1B	-8.99972	0.0108463	-0.98095	0.0269056	2.83181	0.00462851	0.0238362	0.301295
KIAA1949	-28.3988	0.00621939	-2.03501	0.00433997	2.84417	0.00445277	0.0167304	0.297775
C20orf194	-3.39909	0.0307707	-0.980745	0.000561536	2.85476	0.00430691	0.00524922	0.283134
DLG3	-8.55698	0.0101483	-0.934813	0.0328958	2.85651	0.00428324	0.0279528	0.305908
PPIEL	-14.9333	0.00821343	-1.92327	0.000100113	2.85728	0.0042729	0.00103726	0.283134
EML4	-17.5667	0.00676135	-1.41036	0.0389997	2.86	0.0042364	0.010612	0.289464
UTRN	-6.08325	0.0137532	-1.17137	0.000632544	2.87214	0.00407706	0.00408092	0.283134
TTN	-9.05939	0.00989766	-0.985651	0.0498035	2.87627	0.00402403	0.00767662	0.289464
ZNF433	-3.32511	0.0242185	-1.40047	0.000123029	2.87661	0.00401975	0.000941384	0.283134
TANK	-19.4996	0.00647673	-1.19634	0.0253954	2.87903	0.00398898	0.00751285	0.287189
SLC6A16	-6.10565	0.0160573	-1.14238	0.0129476	2.87934	0.00398505	0.00713308	0.283134
MLLT6	-44.7428	0.00487589	-2.03613	0.0455204	2.88432	0.00392255	0.00708119	0.283134
RAPGEF1	-25.3545	0.00587831	-2.40566	0.00121826	2.88614	0.00390003	0.00571247	0.283134
SNORA8	-9.31403	0.00929838	-0.966591	0.0498553	2.88869	0.00386853	0.0153042	0.297775
NCOA3	-17.935	0.00683902	-1.83013	0.00313818	2.89013	0.00385081	0.0044314	0.283134
KCTD7	-6.78404	0.011397	-1.57353	0.000105243	2.90314	0.00369444	0.00293701	0.283134
SNTB2	-6.41937	0.0123817	-1.60677	0.000989132	2.90646	0.00365547	0.00473213	0.283134
ZNF790	-9.38245	0.00934922	-3.45518	0.000801331	2.90925	0.00362299	0.00461709	0.283134
KIAA1407	-20.224	0.00600144	-1.44914	0.00737525	2.90954	0.00361963	0.00386932	0.283134
REP15	-5.4975	0.018221	-1.43172	0.000568282	2.91538	0.00355253	0.00211427	0.283134
C11orf46	-11.3007	0.00851416	-3.88951	0.00255823	2.91747	0.00352878	0.00158219	0.283134
NCRNA00174	-16.8872	0.00588195	-1.80165	0.00108507	2.92492	0.00344548	0.0039759	0.283134
CELF6	-6.36916	0.00939502	-2.03211	0.000326303	2.9398	0.00328425	0.00171474	0.283134
PPFIBP2	-5.56863	0.0129613	-0.694215	0.0213908	2.94163	0.00326494	0.0180551	0.297775
DNM1	-6.24146	0.0124338	-0.571232	0.0418177	2.95991	0.00307729	0.012134	0.291515
NR4A2	-3.33013	0.0204206	-0.750673	0.0251368	2.96466	0.00303015	0.00894211	0.289464
ZNF836	-7.64804	0.00793627	-2.05137	0.00106095	2.97993	0.00288317	0.00663016	0.283134
DRAM2	-26.4489	0.00392571	-2.73707	0.015604	2.98911	0.00279794	0.0196113	0.297775
C7orf53	-8.04146	0.00910484	-1.20525	0.0134541	2.99399	0.00275353	0.00479302	0.283134
TLR6	-2.91713	0.0356072	-0.449212	0.0425943	2.99974	0.00270212	0.00472088	0.283134
TSGA10	-9.45991	0.00755475	-1.57753	0.000169008	3.02666	0.00247269	0.00142561	0.283134
GOLGA8A	-13.6723	0.00484398	-1.05355	0.00943566	3.04113	0.00235691	0.00939231	0.289464
CBLB	-12.7922	0.00547952	-1.3818	0.00285607	3.04573	0.00232114	0.0045719	0.283134
YBX2	-2.3161	0.0352258	-1.25362	6.3043e-05	3.05194	0.00227366	0.000448099	0.283134
KLF6	-12.435	0.00490212	-1.37999	0.00373622	3.05729	0.0022335	0.0123957	0.292814
SYVN1	-25.7672	0.00306078	-3.80021	0.00147229	3.07796	0.0020842	0.00603324	0.283134
PLAT	-6.80318	0.0070083	-0.806071	0.00384601	3.13303	0.00173013	0.00462506	0.283134
IGF1	-4.58667	0.00952911	-0.842236	0.01157	3.20195	0.001365	0.00720254	0.284006
SLC35D2	-26.6239	0.00182212	-1.36381	0.00939936	3.25349	0.00113999	0.00322044	0.283134
CCDC50	-19.9729	0.00181805	-1.1264	0.0272801	3.29599	0.000980762	0.00170943	0.283134
C1orf126	-2.1899	0.0356818	-0.63812	0.00349265	3.30445	0.000951635	0.00615786	0.283134
C14orf101	-40.5362	0.00130439	-3.84267	0.00123846	3.30689	0.000943392	0.00112196	0.283134
DIRAS1	-1.92624	0.0315231	-1.6393	0.00162836	3.31194	0.000926526	0.00170024	0.283134
LMO4	-10.9878	0.00258583	-1.24733	0.00294739	3.31708	0.000909625	0.0041977	0.283134
DNAH11	-2.36977	0.0313443	-0.61173	0.016249	3.31819	0.000906031	0.00501782	0.283134
GRIP1	-6.27058	0.00483956	-1.19083	0.00178047	3.32761	0.000875954	0.00336905	0.283134
NGF	-2.14298	0.0336444	-0.802821	0.00392011	3.33702	0.000846811	0.00671174	0.283134
ANKS1B	-4.54602	0.00818639	-0.959174	0.00169042	3.36203	0.00077373	0.00346137	0.283134
LIF	-3.7825	0.00852497	-1.07478	0.00110181	3.36631	0.000761805	0.00555268	0.283134
OSTCL	-3.34996	0.0132855	-1.4317	0.00650035	3.43528	0.000591949	0.00303569	0.283134
FAM19A2	-2.89395	0.00824803	-1.47418	8.19805e-05	3.61899	0.000295752	0.00162379	0.283134
TBX19	-16.8888	0.000326213	-2.77319	0.00133728	3.78863	0.000151478	0.00119964	0.283134
