# Supplementary material for: A novel immune-related microRNA signature for prognosis of thymoma
Source: Aging (Albany NY). 2022 Jun 7;14(11):4739–54. doi: 10.18632/aging.204108 (PMC9217705; doi:10.18632/aging.204108)
Supplement: Supplementary Table 4 [file aging-14-204108-s004.xlsx]

## Sheet: miR-gene pairs from anamiR
Supplementary Table 4. 41 microRNA-mRNA pairs identified by anamiR.
miRNAs	Gene_symbol	Ensembl	Gene_ID	DIANA_microT_CDS	EIMMo	Microcosm	miRDB	miRanda	PITA	rna22	Targetscan	Sum	miRecords	miRTarBase	Validate	Correlation( -0.5 )	de novo
hsa-miR-425-5p	KIAA0430	ENSG00000166783	9665	1	1	0	1	1	0	0	1	5	0	0	FALSE	-0.511728679491134	0
hsa-miR-425-5p	ZNF780A	ENSG00000197782	284323	1	1	0	0	1	0	0	1	4	0	0	FALSE	-0.562901447381114	0
hsa-miR-874-3p	SEMA4C	ENSG00000168758	54910	1	1	1	0	0	0	0	0	3	0	0	FALSE	-0.692146461739679	0
hsa-miR-425-5p	MAGT1	ENSG00000102158	84061	1	1	0	0	1	0	0	1	4	0	0	FALSE	-0.566356780849617	0
hsa-miR-425-5p	PHF3	ENSG00000118482	23469	1	1	0	0	1	0	0	0	3	0	0	FALSE	-0.500022404118852	0
hsa-miR-130b-5p	EHHADH	ENSG00000113790	1962	1	1	0	0	1	0	0	0	3	0	0	FALSE	-0.540866106490692	0
hsa-miR-425-5p	EHHADH	ENSG00000113790	1962	1	1	0	0	1	1	0	1	5	0	0	FALSE	-0.502178080142438	0
hsa-miR-33b-5p	EHHADH	ENSG00000113790	1962	1	1	0	0	1	0	0	0	3	0	0	FALSE	-0.546137212538695	0
hsa-miR-425-5p	PAPSS1	ENSG00000138801	9061	1	1	0	0	1	0	0	1	4	0	0	FALSE	-0.544409368247554	0
hsa-miR-874-3p	ZNF33A	ENSG00000189180	7581	1	1	0	1	1	0	0	0	4	0	0	FALSE	-0.563554451129526	0
hsa-miR-425-5p	ZNF33A	ENSG00000189180	7581	0	1	0	0	1	0	0	1	3	0	0	FALSE	-0.503904308411189	0
hsa-miR-1307-3p	ZNF841	ENSG00000197608	284371	0	0	0	0	0	0	0	0	0	0	1	TRUE	-0.545040927953809	0
hsa-miR-425-5p	STX7	ENSG00000079950	8417	1	1	0	0	1	0	0	1	4	0	0	FALSE	-0.531489608772539	0
hsa-miR-425-5p	FTO	ENSG00000140718	79068	1	1	0	0	0	0	0	1	3	0	0	FALSE	-0.71579259850095	0
hsa-miR-874-3p	PTPN12	ENSG00000127947	5782	1	1	0	1	1	1	0	0	5	0	0	FALSE	-0.533525488344956	0
hsa-miR-425-3p	PER2	ENSG00000132326	8864	1	1	0	1	1	0	0	0	4	0	1	TRUE	-0.520097149112916	0
hsa-miR-130b-5p	ZBTB38	ENSG00000177311	253461	1	1	0	0	0	0	0	0	2	0	1	TRUE	-0.611128709456226	0
hsa-miR-33b-5p	ZBTB38	ENSG00000177311	253461	0	1	0	0	1	0	1	0	3	0	0	FALSE	-0.512478334213546	0
hsa-miR-33b-5p	NFAT5	ENSG00000102908	10725	1	1	0	1	0	1	0	0	4	0	0	FALSE	-0.511380696771053	0
hsa-miR-425-5p	ZNF12	ENSG00000164631	7559	1	1	0	0	1	0	0	1	4	0	0	FALSE	-0.538477903413316	0
hsa-miR-874-3p	ATP8B1	ENSG00000081923	5205	1	1	0	0	1	0	0	0	3	0	0	FALSE	-0.687975967189687	0
hsa-miR-33b-5p	ATP8B1	ENSG00000081923	5205	1	1	1	0	1	1	1	0	6	0	0	FALSE	-0.595148195917354	0
hsa-miR-874-3p	THRA	ENSG00000126351	7067	1	1	0	0	1	1	0	0	4	0	0	FALSE	-0.531993463192496	0
hsa-miR-130b-5p	NOTCH4	ENSG00000204301	4855	1	1	0	0	1	0	1	0	4	0	0	FALSE	-0.53655217656592	0
hsa-miR-425-5p	BHLHB9	ENSG00000198908	80823	0	1	0	1	1	0	0	1	4	0	1	TRUE	-0.644914714428677	0
hsa-miR-425-5p	ZNF780B	ENSG00000128000	163131	1	1	0	0	1	0	0	1	4	0	0	FALSE	-0.587929747847204	0
hsa-miR-130b-5p	BACE1	ENSG00000186318	23621	1	1	0	0	1	0	0	0	3	0	0	FALSE	-0.53606289395109	0
hsa-miR-874-3p	BACE1	ENSG00000186318	23621	1	1	0	1	0	1	0	0	4	0	0	FALSE	-0.546139973794596	0
hsa-miR-130b-5p	KIF1B	ENSG00000054523	23095	1	1	0	0	1	0	0	0	3	0	0	FALSE	-0.635775115120705	0
hsa-miR-33b-5p	KIF1B	ENSG00000054523	23095	1	1	0	0	1	1	0	0	4	0	0	FALSE	-0.622426164054313	0
hsa-miR-425-5p	SPRY1	ENSG00000164056	10252	0	1	0	0	1	0	0	1	3	0	0	FALSE	-0.580588430620027	0
hsa-miR-33b-5p	SPRY1	ENSG00000164056	10252	1	1	0	0	1	0	0	0	3	0	0	FALSE	-0.630755606848152	0
hsa-miR-425-5p	ZNF70	ENSG00000187792	7621	0	1	0	0	1	0	0	1	3	0	0	FALSE	-0.543299562546978	0
hsa-miR-130b-5p	GALNT4	ENSG00000257594	8693	1	1	0	0	1	0	0	0	3	0	0	FALSE	-0.509225997884576	0
hsa-miR-130b-5p	SOX9	ENSG00000125398	6662	1	1	0	0	1	0	0	0	3	0	0	FALSE	-0.5279503691891	0
hsa-miR-33b-5p	SOX9	ENSG00000125398	6662	1	1	0	0	1	0	0	0	3	0	0	FALSE	-0.505649242133038	0
hsa-miR-425-3p	UTRN	ENSG00000152818	7402	1	1	1	0	0	0	0	0	3	0	0	FALSE	-0.503489993453981	0
hsa-miR-874-3p	NCOA3	ENSG00000124151	8202	1	1	1	0	0	0	0	0	3	0	0	FALSE	-0.615723689932447	0
hsa-miR-425-5p	ZNF790	ENSG00000197863	388536	1	1	0	0	1	0	0	1	4	0	0	FALSE	-0.622098484369177	0
hsa-miR-130b-5p	CCDC50	ENSG00000152492	152137	1	1	0	0	1	0	0	0	3	0	0	FALSE	-0.614091617182653	0
hsa-miR-130b-5p	GRIP1	ENSG00000155974	23426	1	1	0	0	1	0	0	0	3	0	0	FALSE	-0.565415496589919	0
