# Supplementary material for: A novel immune-related microRNA signature for prognosis of thymoma
Source: Aging (Albany NY). 2022 Jun 7;14(11):4739–54. doi: 10.18632/aging.204108 (PMC9217705; doi:10.18632/aging.204108)
Supplement: Supplementary Table 6 [file aging-14-204108-s006.xlsx]

## Sheet: Sheet1
Supplementary Table 6. ANOVA and pairwise comparisons among WHO classification.
	p	adj.p	AB-A	B1-A	B1-AB	B2-A	B2-AB	B2-B1	B3-A	B3-AB	B3-B1	B3-B2	C-A	C-AB	C-B1	C-B2	C-B3
Bcells	0.0233794	0.027276	0.505853	0.189206	1	1	0.476427	0.180182	1	0.456541	0.175232	1	1	0.229791	0.0886165	1	1
CAFs	2.5848e-07	9.56309e-07	1	0.0290997	0.000111213	1	0.027783	0.36296	1	1	0.188506	1	0.0209231	0.11023	2.98592e-07	6.66615e-05	0.0184774
CD4_Tcells	0.101155	0.108936	1	0.269372	0.48068	0.429803	0.773746	1	1	1	1	1	1	1	0.242575	0.394822	1
CD8_Tcells	3.34864e-13	7.03214e-12	0.0675046	7.23896e-07	0.00221207	0.000338413	0.47048	0.273143	1	0.151564	9.91664e-06	0.00242974	0.38999	7.78057e-05	2.14674e-10	1.19884e-07	0.680376
Endothelial	1.14083e-06	3.19432e-06	0.111831	7.97061e-07	0.00122614	0.0001012	0.12058	0.525903	0.477455	1	0.0249444	0.671846	0.605449	1	0.017671	0.519394	1
Macrophages	2.60987e-05	5.21974e-05	1	0.0505806	5.80414e-05	0.608366	0.000926246	1	1	1	0.153769	1	1	1	0.00664737	0.0866722	1
NKcells	0.0101065	0.0124845	1	0.374904	0.549435	0.0320247	0.0260343	1	1	1	1	0.453574	1	1	0.600956	0.104741	1
otherCells	1.87836e-10	1.31485e-09	0.0219025	8.65212e-07	0.00916233	0.000269958	1	0.336796	1	0.00244269	1.24937e-07	3.38862e-05	1	0.260118	0.00010065	0.0132704	1
T_cells	5.83441e-12	6.12613e-11	0.0511488	1.45791e-08	0.000129029	8.55766e-07	0.00878579	0.708402	1	1	7.90416e-05	0.00369652	1	0.322679	2.4983e-06	0.000144025	1
CD8_T_cells	5.08169e-12	6.12613e-11	0.0734024	7.75069e-07	0.00210101	0.00011097	0.206372	0.497358	1	0.44201	5.89356e-05	0.004887	1	0.000983829	5.6507e-09	7.97548e-07	0.874777
Cytotoxic_lymphocytes	0.555833	0.555833	0.437934	1	1	1	1	1	1	1	1	1	1	1	1	1	1
NK_cells	0.00109725	0.00153615	0.570964	0.00182135	0.0896837	0.00261143	0.183117	1	0.978841	1	0.537936	1	1	1	0.190441	0.430863	1
B_lineage	1.68888e-05	3.57979e-05	1	0.205841	0.52636	7.67658e-05	5.15929e-05	0.600886	0.402019	0.968859	1	0.717624	0.0701886	0.175952	1	1	1
Monocytic_lineage	5.23898e-05	0.000100017	1	0.0334967	0.00306373	0.887386	0.183322	0.663402	1	0.822583	1	1	0.303304	0.30112	4.3233e-05	0.00236334	0.0230467
Myeloid_dendritic_cells	1.00481e-13	4.22021e-12	0.0485906	4.83262e-07	0.00240947	1.95741e-05	0.0965966	0.856522	1	0.21146	1.87819e-05	0.000694209	0.784534	0.000254586	1.11763e-09	4.14287e-08	0.853562
Neutrophils	0.000955657	0.00138406	1	0.0372172	0.0369857	0.973871	1	0.653268	0.7569	1	1	1	0.925442	0.272016	0.000457258	0.0201633	0.0291885
Endothelial_cells	2.73231e-07	9.56309e-07	0.497278	6.54943e-07	8.75643e-05	0.000166919	0.0210369	0.376929	0.0473611	1	0.25927	1	0.014727	0.435747	0.590801	1	1
Fibroblasts	1.59106e-05	3.57979e-05	1	0.0308846	0.000992885	0.950732	0.0855337	0.580319	1	1	0.373269	1	0.170956	0.283625	1.31625e-05	0.000986582	0.0653214
B_cells_naive_lm22	0.0190423	0.0228507	1	1	1	1	0.0521941	0.0926213	1	0.405293	0.35511	1	1	0.238583	0.222246	1	1
B_cells_memory_lm22	0.481394	0.493136	0.699979	0.763396	1	1	1	1	0.986684	1	1	1	1	1	1	1	1
Plasma_cells_lm22	0.00378481	0.00481702	1	0.388738	1	1	1	1	0.0938139	0.817705	1	0.77429	0.001486	0.0221385	0.438394	0.0217018	1
T_cells_CD8_lm22	0.0311094	0.0353134	0.788492	0.038336	0.72431	0.0275728	0.802266	1	1	1	1	1	1	1	0.566565	0.694607	1
T_cells_CD4_naive_lm22	2.21416e-09	1.3285e-08	0.00476543	6.43369e-06	0.130821	2.37975e-05	0.810771	1	1	1	0.0153584	0.0864843	1	0.00195526	3.72176e-06	1.72048e-05	0.526896
T_cells_CD4_memory_resting_lm22	2.48208e-07	9.56309e-07	1	0.00221431	0.00254094	0.278151	0.497056	0.284132	1	0.39259	5.71493e-05	0.0102466	0.38091	0.0525649	2.12704e-06	0.000594903	1
T_cells_CD4_memory_activated_lm22	8.28788e-06	2.04759e-05	1	0.00459871	0.0270713	0.000909772	0.00462163	1	1	1	0.00499946	0.0016405	0.150382	0.681561	1	1	0.11255
T_cells_follicular_helper_lm22	4.72455e-11	3.96863e-10	0.0328745	3.68102e-09	7.65166e-05	3.88255e-06	0.0479078	0.213234	1	1	4.1384e-05	0.0112021	1	0.867015	1.18505e-05	0.00395689	1
T_cells_regulatory_lm22	0.141989	0.149089	1	0.0520552	0.370513	0.86212	1	0.948693	1	1	0.475726	1	1	1	1	1	1
T_cells_gamma_delta_lm22	6.94093e-08	3.2391e-07	1	1	1	1	1	1	0.0690527	0.0114465	0.0212954	0.00551881	8.83338e-05	1.8583e-06	1.79332e-05	7.14287e-07	0.800656
NK_cells_resting_lm22	1.70466e-05	3.57979e-05	0.25365	0.0102461	0.754029	1	1	0.17355	1	0.00954807	0.000334379	0.0736456	1	0.00881035	0.000306739	0.0689566	1
NK_cells_activated_lm22	0.000186774	0.000301712	0.0268915	0.108148	1	0.0629112	1	1	1	0.0722782	0.174777	0.13595	1	0.00379228	0.0175861	0.00900321	1
Monocytes_lm22	0.000488261	0.000759517	1	0.690212	0.908724	1	1	1	1	0.534104	0.0412854	0.0767565	0.125443	0.0188708	0.000938333	0.00124043	1
Macrophages_M0_lm22	8.07729e-05	0.000141353	0.307142	0.612042	1	0.31559	1	1	1	0.205805	0.381994	0.209519	0.205507	0.000185341	0.00159025	0.00021857	0.77137
Macrophages_M1_lm22	0.000535137	0.000802706	1	0.0843776	0.331548	0.699171	1	1	1	1	0.167547	1	0.318468	0.01591	0.000167713	0.00174501	0.515305
Macrophages_M2_lm22	0.0023871	0.00323414	0.922128	0.208535	1	0.13885	1	1	1	0.887826	0.222577	0.176781	1	0.0616652	0.0137564	0.00653828	1
Dendritic_cells_resting_lm22	4.63765e-07	1.3913e-06	0.0273572	0.414974	1	0.0262971	1	1	1	0.370601	1	0.343605	0.116835	1.54428e-06	0.00035597	1.68811e-06	0.0664318
Dendritic_cells_activated_lm22	6.98741e-06	1.8342e-05	1	1	1	1	1	1	1	0.429704	1	0.831	0.00256264	1.26848e-06	0.000122481	8.2123e-06	0.052174
Mast_cells_resting_lm22	6.0556e-05	0.000110581	2.08418e-05	0.000357703	1	0.000368569	1	1	0.0523569	1	1	1	0.00146621	1	1	1	1
Mast_cells_activated_lm22	0.0528856	0.0584525	0.029914	0.0488903	1	0.149971	1	1	1	1	1	1	0.177306	1	1	1	1
Eosinophils_lm22	3.54036e-08	1.85869e-07	1	1	1	1	1	1	1	1	1	1	1.20318e-07	2.12659e-07	2.72789e-07	2.37771e-08	5.45153e-05
Neutrophils_lm22	0.00329976	0.00433093	1	1	1	1	1	1	1	1	1	1	0.00573504	0.0029474	0.00134584	0.00233554	0.206478
IMRS3	3.01705e-07	9.74738e-07	1	0.401018	0.00669119	1	0.0136308	1	0.143693	0.0023008	1	1	0.000797839	7.53793e-07	0.299417	0.0169421	1
TREM2hi	0.000112545	0.000189075	1	1	1	0.565022	0.473331	0.881464	0.00692257	0.0037318	0.0136747	0.252823	0.00858821	0.00480103	0.0166921	0.298003	1
