# Supplementary material for: A novel immune-related microRNA signature for prognosis of thymoma
Source: Aging (Albany NY). 2022 Jun 7;14(11):4739–54. doi: 10.18632/aging.204108 (PMC9217705; doi:10.18632/aging.204108)
Supplement: Supplementary Table 7 [file aging-14-204108-s007.xlsx]

## Sheet: Sheet1
Supplementary Table 7. GSEA analysis for TREM2hi versus TREM2lo.
ID	Description	setSize	enrichmentScore	NES	pvalue	p.adjust	qvalues	rank	leading_edge	core_enrichment
R-HSA-6783783	Interleukin-10 signaling	41	0.653149	2.84594	0.00359712	0.025316	0.0169674	1870	tags=59%, list=13%, signal=51%	6348/3557/7133/6352/6351/3586/7076/941/3606/6349/1234/6363/2357/3587/3569/2208/942/6364/1230/3627/3383/5743/7124/2920
R-HSA-611105	Respiratory electron transport	84	0.539439	2.7567	0.00492611	0.0278861	0.0186899	3723	tags=67%, list=26%, signal=50%	10131/51204/4723/4720/4731/10975/1537/4715/91942/9997/374291/4705/1329/4706/27089/7384/4708/4726/4702/9377/4713/4716/51295/4728/6834/1351/51079/4704/7386/1349/4697/54539/2108/1337/1345/4696/4724/1340/28976/4695/29796/4694/54205/1350/4725/126328/4700/6391/6341/4707/4717/4722/2109/4711/4718/51241
R-HSA-70263	Gluconeogenesis	29	0.676288	2.73367	0.00324675	0.0241971	0.0162175	1822	tags=48%, list=13%, signal=42%	226/2203/7167/219855/2542/5106/2821/4191/5223/92579/6576/230/2023/2805
R-HSA-2173782	Binding and Uptake of Ligands by Scavenger Receptors	36	0.640168	2.72213	0.00342466	0.0244847	0.0164103	2469	tags=44%, list=17%, signal=37%	8685/348/2495/3039/2512/3043/3040/9332/8542/1281/949/1277/23166/4481/3240/1278
R-HSA-877300	Interferon gamma signaling	86	0.530394	2.72031	0.00497512	0.0279749	0.0187494	2504	tags=50%, list=18%, signal=41%	10437/3107/3458/2634/3106/8638/3123/3134/3105/4502/3665/3662/4261/3663/3135/3133/5371/2210/2209/4938/115362/4684/163351/115361/3383/3115/4939/3117/960/3122/3127/9021/2633/6772/23650/2635/10379/3113/567/3659/3119/3118/3661
R-HSA-163200	Respiratory electron transport, ATP synthesis by chemiosmotic coupling, and heat production by uncoupling proteins.	88	0.521405	2.68273	0.00505051	0.0279819	0.0187542	3723	tags=64%, list=26%, signal=47%	10131/51204/4723/4720/4731/10975/1537/4715/91942/9997/374291/4705/1329/4706/27089/7384/4708/4726/4702/9377/4713/4716/51295/4728/6834/1351/51079/4704/7386/1349/4697/54539/2108/1337/1345/4696/4724/1340/28976/4695/29796/4694/54205/1350/4725/126328/4700/6391/6341/4707/4717/4722/2109/4711/4718/51241
R-HSA-166658	Complement cascade	38	0.61385	2.64568	0.00346021	0.0244847	0.0164103	1203	tags=32%, list=8%, signal=29%	1675/717/712/713/714/733/730/728/930/2219/719/8547
R-HSA-1236975	Antigen processing-Cross presentation	96	0.507303	2.6336	0.00529101	0.0287037	0.0192379	3413	tags=54%, list=24%, signal=42%	3107/3106/23643/6810/3134/3105/653361/8673/929/3135/3133/695/2210/4688/2209/6890/1536/5721/5705/4689/6892/5708/7316/5698/5693/29927/5692/5688/5700/5710/7097/5707/567/4360/1520/1535/8517/5690/5691/5714/9341/7099/811/7311/5717/5704/5720/6233/23480/5699/5696/10333
R-HSA-6799198	Complex I biogenesis	45	0.577408	2.57911	0.00369004	0.0258303	0.0173121	3653	tags=69%, list=26%, signal=51%	4723/4720/4731/4715/91942/374291/4705/4706/4708/4726/4702/4713/4716/51295/4728/51079/4704/54539/4696/4724/28976/4695/4694/4725/126328/4700/4707/4717/4722/4711/4718
R-HSA-375276	Peptide ligand-binding receptors	119	0.468751	2.54922	0.00598802	0.030722	0.0205906	3554	tags=55%, list=25%, signal=42%	6348/6352/6351/6366/10663/10563/4828/58191/643/728/6349/6357/1234/6363/5368/3792/5660/2861/2357/1907/623/6752/2358/6373/6364/256933/1230/6865/3627/719/3640/2359/4157/51738/8811/4283/2920/6846/2833/6376/9718/6869/8620/187/6356/3577/1906/7504/5367/2151/727/10874/6367/10911/183/4987/283869/729230/1235/554/1889/3814/2150/718/7200/6347
R-HSA-6809371	Formation of the cornified envelope	63	0.534817	2.53123	0.00429185	0.0262156	0.0175704	4150	tags=63%, list=29%, signal=45%	3868/3857/144501/3866/8689/3853/3860/3856/2125/3890/5317/3881/3884/5652/64065/11187/3891/3882/1824/826/6768/1830/3854/3875/1041/5045/1475/3848/286887/1828/25984/3852/121391/3858/3855/3728/823/1825/3880/5493
R-HSA-1222556	ROS and RNS production in phagocytes	33	0.606952	2.50626	0.00346021	0.0244847	0.0164103	2322	tags=52%, list=16%, signal=43%	8992/6556/533/10312/653361/535/527/4688/1536/4689/245972/90423/1535/9296/4846/9114/526
R-HSA-166663	Initial triggering of complement	17	0.714025	2.48396	0.00294118	0.0237939	0.0159472	1203	tags=41%, list=8%, signal=38%	1675/717/712/713/714/2219/8547
R-HSA-5669034	TNFs bind their physiological receptors	27	0.632446	2.46516	0.00323625	0.0241971	0.0162175	1816	tags=56%, list=13%, signal=49%	8784/7133/970/10673/23495/7293/8718/356/4982/8744/8764/943/608/8600/3604
R-HSA-380108	Chemokine receptors bind chemokines	46	0.546732	2.44561	0.00371747	0.025853	0.0173273	2514	tags=50%, list=18%, signal=41%	6348/6352/6351/6366/10663/10563/58191/643/6349/6357/1234/6363/6373/6364/1230/3627/4283/2920/6846/2833/6376/6356/3577
R-HSA-6805567	Keratinization	67	0.505612	2.4406	0.00442478	0.0264188	0.0177065	4150	tags=60%, list=29%, signal=43%	3868/3857/144501/3866/8689/3853/3860/3856/2125/3890/5317/3881/3884/5652/64065/11187/3891/3882/1824/826/6768/1830/3854/3875/1041/5045/1475/3848/286887/1828/25984/3852/121391/3858/3855/3728/823/1825/3880/5493
R-HSA-909733	Interferon alpha/beta signaling	55	0.532573	2.4364	0.00406504	0.025853	0.0173273	3628	tags=67%, list=25%, signal=50%	3107/2634/3106/8638/3429/3134/3105/3430/3665/2537/3662/3663/3135/3133/4938/9636/4939/9021/6772/4599/10379/91543/3437/54739/3659/1958/3661/3669/8519/103/10410/5696/3434/6773/684/3394/10581
R-HSA-1236974	ER-Phagosome pathway	82	0.477697	2.41321	0.005	0.0279749	0.0187494	3413	tags=52%, list=24%, signal=40%	3107/3106/23643/6810/3134/3105/8673/929/3135/3133/695/6890/5721/5705/6892/5708/7316/5698/5693/29927/5692/5688/5700/5710/7097/5707/567/8517/5690/5691/5714/9341/7099/811/7311/5717/5704/5720/6233/23480/5699/5696/10333
R-HSA-198933	Immunoregulatory interactions between a Lymphoid and a non-Lymphoid cell	113	0.451695	2.40797	0.00628931	0.0311357	0.0208679	2623	tags=42%, list=18%, signal=35%	6614/27036/3107/3106/11026/54210/146722/3134/57823/7305/11006/3105/353514/933/29992/10859/10871/3135/126014/3821/27180/3133/2209/930/3805/5817/56654/1281/339390/3383/3695/11126/124599/2214/1277/945/6441/27181/54209/2213/114132/567/3824/11027/22914/1278/51348/117157
R-HSA-977606	Regulation of Complement cascade	31	0.591397	2.40421	0.00334448	0.0243269	0.0163045	1170	tags=29%, list=8%, signal=27%	717/712/713/714/733/730/728/930/719
R-HSA-1268020	Mitochondrial protein import	51	0.527776	2.38789	0.00403226	0.025853	0.0173273	3356	tags=55%, list=23%, signal=42%	617/400916/2395/1537/4580/23203/26519/1678/50/291/54543/1431/10440/92609/80273/84269/26517/3329/150274/2671/6901/10531/26521/10063/3421/10245/10452/3313
R-HSA-373076	Class A/1 (Rhodopsin-like receptors)	196	0.403647	2.36564	0.00862069	0.0379194	0.0254145	3554	tags=46%, list=25%, signal=35%	6348/1240/6352/6351/2865/6366/10663/10563/4828/5739/58191/643/728/6349/6357/1234/6363/5368/3792/5660/29933/2861/2357/154/5031/1907/623/6752/2358/6373/6364/256933/1230/6865/134/3627/719/3640/2359/8111/4157/51738/53637/8811/4283/150/151306/2920/5032/6846/3363/3269/2833/140/6376/9718/1880/6869/8620/2859/187/6356/3577/5029/1906/147/7504/146/5367/5724/3357/2151/727/10874/6367/10911/2867/183/4987/28386…
R-HSA-5668541	TNFR2 non-canonical NF-kB pathway	99	0.449947	2.33195	0.00537634	0.0289256	0.0193866	3530	tags=53%, list=25%, signal=40%	8784/7133/5971/970/10673/9020/4791/23495/7293/8718/356/4982/8744/8764/5721/943/7186/5705/608/51330/5708/7316/7187/5698/5693/407977/5692/8600/5688/5700/7124/3604/5710/5707/9040/4049/330/5690/115650/5691/5714/939/8792/7311/5717/5704/5720/6233/5699/5696/5694/4055
R-HSA-3299685	Detoxification of Reactive Oxygen Species	34	0.551884	2.30924	0.00340136	0.0244847	0.0164103	2941	tags=62%, list=21%, signal=49%	475/2877/6649/2950/653361/2876/4688/10587/6648/1536/50507/4689/5034/25828/9588/7001/6647/1535/25824/54205/9973
R-HSA-1428517	The citric acid (TCA) cycle and respiratory electron transport	133	0.410728	2.27404	0.00649351	0.0315878	0.0211709	3466	tags=50%, list=24%, signal=39%	10131/51204/4723/4720/4731/10975/9123/4191/1537/2954/4715/91942/9997/374291/4705/1329/4706/27089/50/7384/4708/4726/4702/9377/4713/4716/1431/51295/4728/728294/6834/1351/51079/4704/7386/2271/1349/4697/54539/3420/81889/2108/1337/1345/4696/4724/1340/28976/4695/29796/4694/3029/54205/4199/1350/4725/126328/4700/3421/6391/6341/4707/1738/4717/4967/4722/2109
R-HSA-166786	Creation of C4 and C2 activators	10	0.764916	2.24572	0.00286533	0.0237939	0.0159472	1203	tags=50%, list=8%, signal=46%	712/713/714/2219/8547
R-HSA-917977	Transferrin endocytosis and recycling	30	0.553119	2.23329	0.00328947	0.0241971	0.0162175	3096	tags=53%, list=22%, signal=42%	8992/533/57192/10312/535/527/537/245972/90423/9296/9114/526/55240/7018/155066/245973
R-HSA-3000480	Scavenging by Class A Receptors	17	0.63867	2.22181	0.00294118	0.0237939	0.0159472	2947	tags=53%, list=21%, signal=42%	8685/348/2495/2512/1281/1277/4481/1278/811
R-HSA-2168880	Scavenging of heme from plasma	10	0.755684	2.21862	0.00286533	0.0237939	0.0159472	924	tags=50%, list=6%, signal=47%	3039/3043/3040/9332/8542
R-HSA-5423646	Aflatoxin activation and detoxification	17	0.632515	2.2004	0.00294118	0.0237939	0.0159472	3978	tags=71%, list=28%, signal=51%	124975/4257/4258/1577/4259/95/1800/246181/1576/22977/8574/64180
R-HSA-5389840	Mitochondrial translation elongation	85	0.429816	2.19915	0.00490196	0.0278705	0.0186795	3397	tags=52%, list=24%, signal=40%	51081/79590/51116/6183/26284/26589/51073/6182/51373/128308/51253/51264/64978/65993/7284/64951/9553/63875/51650/90480/64976/122704/54998/55052/54460/64963/116541/64928/10884/51021/116540/6150/64949/64975/10573/63931/65003/64432/7818/55168/5018/51258/118487/29088
R-HSA-75205	Dissolution of Fibrin Clot	11	0.720344	2.19452	0.0028169	0.0237939	0.0159472	3404	tags=82%, list=24%, signal=62%	5329/5269/5054/5055/5328/5345/302/6281/5271
R-HSA-114608	Platelet degranulation	109	0.411492	2.19334	0.00609756	0.030722	0.0205906	2952	tags=39%, list=21%, signal=31%	1675/5265/12/226/2153/7423/7076/6403/2/51706/94121/1893/5054/7277/5768/967/7450/5660/8407/5341/3959/51368/7873/7040/88/5345/22927/10490/29106/2316/6647/5552/3479/7057/3699/78991/3082/928/1521/3690/7123/7018
R-HSA-77387	Insulin receptor recycling	24	0.557046	2.134	0.00309598	0.0237939	0.0159472	3096	tags=54%, list=22%, signal=43%	8992/533/10312/535/527/537/245972/90423/9296/9114/526/155066/245973
R-HSA-5368286	Mitochondrial translation initiation	85	0.415962	2.12826	0.00490196	0.0278705	0.0186795	3397	tags=51%, list=24%, signal=39%	51081/79590/51116/6183/26284/26589/51073/6182/51373/128308/51253/51264/64978/65993/64951/9553/63875/51650/90480/64976/122704/54998/55052/54460/64963/116541/64928/10884/51021/116540/6150/64949/64975/10573/63931/65003/64432/7818/55168/5018/51258/118487/29088
R-HSA-5419276	Mitochondrial translation termination	85	0.411821	2.10708	0.00490196	0.0278705	0.0186795	3397	tags=51%, list=24%, signal=39%	51081/79590/51116/6183/26284/26589/51073/6182/51373/128308/51253/51264/64978/65993/64951/9553/63875/51650/90480/64976/122704/54998/55052/54460/64963/116541/64928/10884/51021/116540/6150/64949/64975/10573/63931/65003/64432/7818/55168/5018/51258/118487/29088
R-HSA-76005	Response to elevated platelet cytosolic Ca2+	114	0.391842	2.10554	0.00609756	0.030722	0.0205906	2857	tags=37%, list=20%, signal=30%	1675/5265/12/226/2153/7423/6810/7076/6403/2/51706/94121/1893/5054/7277/5768/967/7450/5660/8407/5341/3959/51368/7873/7040/88/5345/22927/10490/29106/2316/6647/5552/3479/7057/3699/78991/3082/928/1521/3690/7123
R-HSA-5368287	Mitochondrial translation	91	0.404847	2.09559	0.00515464	0.028345	0.0189975	3397	tags=48%, list=24%, signal=37%	51081/79590/51116/6183/26284/26589/51073/6182/51373/128308/51253/51264/64978/65993/7284/64951/9553/63875/51650/90480/64976/122704/54998/55052/54460/64963/116541/64928/10884/51021/116540/6150/64949/64975/10573/63931/65003/64432/7818/55168/5018/51258/118487/29088
R-HSA-140534	Caspase activation via Death Receptors in the presence of ligand	16	0.608003	2.07924	0.00287356	0.0237939	0.0159472	1008	tags=44%, list=7%, signal=41%	8743/23643/8717/356/929/148022/7186
R-HSA-5621480	Dectin-2 family	16	0.6037	2.06452	0.00287356	0.0237939	0.0159472	3783	tags=69%, list=26%, signal=51%	26253/2207/4582/4585/200958/4067/10462/6850/143662/5336/4588
R-HSA-917937	Iron uptake and transport	56	0.45273	2.05806	0.004329	0.0262156	0.0175704	3231	tags=50%, list=23%, signal=39%	2495/8992/533/57192/2512/9843/10312/1356/3162/3163/535/527/7316/537/245972/90423/9296/9114/526/3934/55240/7018/28982/7311/155066/245973/4738/6233
R-HSA-1482922	Acyl chain remodelling of PI	10	0.700457	2.05647	0.00286533	0.0237939	0.0159472	246	tags=40%, list=2%, signal=39%	5322/26279/8605/79143
R-HSA-2142753	Arachidonic acid metabolism	49	0.452937	2.056	0.00384615	0.025853	0.0173273	2037	tags=33%, list=14%, signal=28%	9261/9536/1580/80142/2877/2879/1573/2876/873/5743/242/247/158584/5742/126410/4051
R-HSA-6803157	Antimicrobial peptides	30	0.508268	2.0522	0.00328947	0.0241971	0.0162175	3229	tags=53%, list=23%, signal=41%	475/6556/6280/6279/10578/4057/4069/1672/1113/7097/820/6039/114770/3934/729230/1235
R-HSA-1592389	Activation of Matrix Metalloproteinases	21	0.542413	2.01206	0.00303951	0.0237939	0.0159472	3495	tags=57%, list=24%, signal=43%	4316/7076/1513/4312/4318/64386/4320/5045/4324/7177/10893/4313
R-HSA-6785807	Interleukin-4 and Interleukin-13 signaling	96	0.386065	2.00421	0.00529101	0.0287037	0.0192379	3865	tags=50%, list=27%, signal=37%	1026/7133/3726/3586/7076/3662/3687/356/4312/3606/3162/2353/4318/4582/10538/3569/2208/5008/3383/3566/5743/7040/9021/6772/7124/3684/3312/3976/3718/6356/1278/3082/3934/3553/6367/1052/246/7412/3593/4313/6347/595/6657/6774/3597/301/3320/3570
R-HSA-5260271	Diseases of Immune System	24	0.520498	1.99399	0.00309598	0.0237939	0.0159472	3413	tags=58%, list=24%, signal=44%	23643/4791/81622/929/695/148022/7187/7097/7100/8517/7099/5970/81793/10333
R-HSA-5602358	Diseases associated with the TLR signaling cascade	24	0.520498	1.99399	0.00309598	0.0237939	0.0159472	3413	tags=58%, list=24%, signal=44%	23643/4791/81622/929/695/148022/7187/7097/7100/8517/7099/5970/81793/10333
R-HSA-1474228	Degradation of the extracellular matrix	115	0.365996	1.96904	0.0060241	0.030722	0.0205906	2479	tags=31%, list=17%, signal=26%	4316/8751/4321/1509/6696/101/7076/2/1513/4312/1508/147968/388743/4318/1307/3914/1281/2006/131873/64386/1290/960/1295/170690/2200/164656/1277/1294/1300/826/5654/1520/9507/1278/4320/56999
R-HSA-2022377	Metabolism of Angiotensinogen to Angiotensins	15	0.584392	1.95626	0.00288184	0.0237939	0.0159472	728	tags=33%, list=5%, signal=32%	1509/2999/290/1522/1636
R-HSA-1237044	Erythrocytes take up carbon dioxide and release oxygen	10	0.665	1.95238	0.00286533	0.0237939	0.0159472	432	tags=40%, list=3%, signal=39%	3039/51706/3043/3040
R-HSA-1480926	O2/CO2 exchange in erythrocytes	10	0.665	1.95238	0.00286533	0.0237939	0.0159472	432	tags=40%, list=3%, signal=39%	3039/51706/3043/3040
R-HSA-1474244	Extracellular matrix organization	254	0.319352	1.94096	0.0119048	0.0476792	0.0319557	2479	tags=27%, list=17%, signal=23%	4316/8751/4321/1509/6696/54829/22801/4060/101/1311/7076/8076/2/8985/1513/3687/140766/9672/4312/5054/1508/147968/634/388743/8728/4318/7450/10319/1307/9378/3914/50848/1281/2006/4684/131873/3383/3695/5034/84695/64386/8974/1290/960/1295/170690/2200/7040/6382/3681/164656/1277/1294/3679/169044/1300/3684/7148/826/5033/5654/63923/1520/7057/9507/1278/2202/4320/56999
R-HSA-1679131	Trafficking and processing of endosomal TLR	11	0.633952	1.93133	0.0084507	0.0377873	0.025326	1111	tags=45%, list=8%, signal=42%	5641/1513/81622/1508/51311
R-HSA-381426	Regulation of Insulin-like Growth Factor (IGF) transport and uptake by Insulin-like Growth Factor Binding Proteins (IGFBPs)	95	0.369879	1.92373	0.00518135	0.028345	0.0189975	3624	tags=44%, list=25%, signal=33%	348/5265/2999/6696/2153/7076/54972/1356/4312/10272/5768/10232/7466/255738/8542/3569/5034/4924/8614/2200/29106/2519/5624/3479/3698/7425/7857/10970/1471/3486/7018/51246/1114/5954/64856/3371/3487/718/4313/3484/3816/3913
R-HSA-5676594	TNF receptor superfamily (TNFSF) members mediating non-canonical NF-kB pathway	18	0.541061	1.9233	0.00302115	0.0237939	0.0159472	3015	tags=61%, list=21%, signal=48%	10673/9020/7186/51330/7187/407977/8600/4049/330/115650/8792
R-HSA-5686938	Regulation of TLR by endogenous ligand	13	0.591001	1.88876	0.00857143	0.0379194	0.0254145	2016	tags=54%, list=14%, signal=46%	23643/929/6280/6279/729238/6441/7097
R-HSA-156590	Glutathione conjugation	31	0.462734	1.88115	0.00334448	0.0243269	0.0163045	3358	tags=42%, list=23%, signal=32%	124975/373156/2950/4257/2954/4258/4259/79094/2952/119391/26873/2729/2937
R-HSA-1442490	Collagen degradation	53	0.412349	1.87192	0.00423729	0.0262156	0.0175704	1819	tags=30%, list=13%, signal=26%	4316/4321/1509/1513/4312/1508/4318/1307/1281/131873/1290/1295/164656/1277/1294/1300
R-HSA-5602498	MyD88 deficiency (TLR2/4)	10	0.634633	1.86322	0.00859599	0.0379194	0.0254145	3413	tags=60%, list=24%, signal=46%	23643/929/695/7097/7099/10333
R-HSA-8957275	Post-translational protein phosphorylation	83	0.36601	1.85568	0.00505051	0.0279819	0.0187542	3624	tags=45%, list=25%, signal=33%	348/5265/6696/2153/7076/54972/1356/10272/5768/10232/7466/255738/8542/3569/5034/4924/8614/2200/29106/2519/5624/3698/7425/7857/10970/1471/3486/7018/51246/1114/5954/64856/3371/3487/718/3484/3913
R-HSA-163125	Post-translational modification: synthesis of GPI-anchored proteins	74	0.370193	1.85039	0.00452489	0.0264188	0.0177065	2498	tags=35%, list=17%, signal=29%	1368/284348/5329/4045/50863/4061/8733/420/146183/10232/8000/128869/94005/503542/51299/27076/84628/419/8876/8818/54344/51604/2215/249/266727/55350
R-HSA-382556	ABC-family proteins mediated transport	100	0.354126	1.84714	0.00537634	0.0289256	0.0193866	3528	tags=44%, list=25%, signal=33%	10350/10058/23457/23460/21/5721/11194/368/5705/5708/7316/5698/26154/5693/215/10351/5692/20/79139/5688/5700/3767/91319/10956/10349/5710/5707/8894/8714/5690/5691/5714/85320/7311/64240/5717/5704/5720/6233/5699/9619/5696/5244/5694
R-HSA-140877	Formation of Fibrin Clot (Clotting Cascade)	25	0.479522	1.83631	0.003125	0.0237939	0.0159472	2733	tags=36%, list=19%, signal=29%	2153/2/2161/2159/7450/57126/5624/7056/5547
R-HSA-71240	Tryptophan catabolism	11	0.601477	1.83239	0.0112676	0.0459888	0.0308228	1492	tags=45%, list=10%, signal=41%	6520/8564/8942/125061/3620
R-HSA-983170	Antigen Presentation: Folding, assembly and peptide loading of class I MHC	25	0.478049	1.83067	0.003125	0.0237939	0.0159472	1328	tags=36%, list=9%, signal=33%	3107/3106/3134/3105/3135/3133/6890/6892/10134
R-HSA-1236978	Cross-presentation of soluble exogenous antigens (endosomes)	49	0.401106	1.82072	0.00384615	0.025853	0.0173273	3528	tags=45%, list=25%, signal=34%	2210/2209/5721/5705/5708/5698/5693/5692/5688/5700/5710/5707/4360/5690/5691/5714/5717/5704/5720/5699/5696/5694
R-HSA-936964	Activation of IRF3/IRF7 mediated by TBK1/IKK epsilon	17	0.521946	1.81575	0.00294118	0.0237939	0.0159472	3231	tags=65%, list=23%, signal=50%	23643/3665/929/148022/7316/7187/23098/3661/7099/7311/6233
R-HSA-211945	Phase I - Functionalization of compounds	76	0.35949	1.81477	0.0045045	0.0264188	0.0177065	2037	tags=30%, list=14%, signal=26%	1580/874/66002/196743/1573/216/2232/84532/219/1583/1577/23491/2328/670/29785/134147/2327/5742/9915/9420/1588/126410/4051
R-HSA-211859	Biological oxidations	158	0.318815	1.81373	0.00757576	0.0356088	0.0238659	2248	tags=28%, list=16%, signal=24%	124975/1580/373156/874/66002/2950/4257/4837/196743/1573/116285/216/2232/2954/6820/84532/4258/219/6799/8459/1583/1577/23491/2328/54578/670/29785/134147/4259/6818/79094/2327/219970/5742/9915/6819/9420/1588/6817/126410/4051/50512/2952/4143/95
R-HSA-5619084	ABC transporter disorders	74	0.359019	1.79454	0.00452489	0.0264188	0.0177065	3528	tags=45%, list=25%, signal=34%	10058/21/5721/368/5705/5708/7316/5698/26154/5693/215/5692/79139/5688/5700/3767/91319/10956/5710/5707/5690/5691/5714/7311/64240/5717/5704/5720/6233/5699/5696/5244/5694
R-HSA-977068	Termination of O-glycan biosynthesis	15	0.53575	1.79343	0.00576369	0.030722	0.0205906	1621	tags=33%, list=11%, signal=30%	4582/4585/27090/200958/10610
R-HSA-216083	Integrin cell surface interactions	78	0.352877	1.78833	0.0046729	0.0270405	0.0181232	1903	tags=28%, list=13%, signal=25%	6696/22801/4060/1311/3687/7450/1307/50848/1281/131873/3383/3695/1290/960/1295/2200/3681/1277/1294/3679/1300/3684
R-HSA-140875	Common Pathway of Fibrin Clot Formation	13	0.558366	1.78446	0.0114286	0.0462112	0.0309718	2729	tags=38%, list=19%, signal=31%	2153/2159/57126/5624/7056
R-HSA-2162123	Synthesis of Prostaglandins (PG) and Thromboxanes (TX)	14	0.549206	1.78124	0.00297619	0.0237939	0.0159472	1733	tags=36%, list=12%, signal=31%	9536/80142/873/5743/5742
R-HSA-196071	Metabolism of steroid hormones	23	0.466704	1.77178	0.00606061	0.030722	0.0205906	1865	tags=39%, list=13%, signal=34%	706/6770/3290/2232/6715/3292/1583/79644/1588
R-HSA-140837	Intrinsic Pathway of Fibrin Clot Formation	14	0.54404	1.76449	0.00595238	0.030722	0.0205906	2733	tags=43%, list=19%, signal=35%	2/2161/2159/7450/5624/5547
R-HSA-202733	Cell surface interactions at the vascular wall	113	0.330613	1.76249	0.00628931	0.0311357	0.0208679	2854	tags=35%, list=20%, signal=28%	9056/54210/6403/6520/2207/3687/140885/9672/3897/4312/634/29802/2886/972/9463/9123/6401/481/50848/57126/2817/965/4282/960/7040/6382/4067/1277/3684/5624/3265/1278/4973/284/7056/9046/83953/3690/23657
R-HSA-8963898	Plasma lipoprotein assembly	13	0.543158	1.73586	0.0114286	0.0462112	0.0309718	245	tags=31%, list=2%, signal=30%	348/344/341/2
R-HSA-2142691	Synthesis of Leukotrienes (LT) and Eoxins (EX)	17	0.497756	1.7316	0.00882353	0.0384222	0.0257515	4074	tags=47%, list=28%, signal=34%	9261/1580/126410/4051/1800/246/64180/4056
R-HSA-210991	Basigin interactions	23	0.452903	1.71939	0.00606061	0.030722	0.0205906	923	tags=26%, list=6%, signal=24%	9056/6520/3897/4312/9123/481
R-HSA-450408	AUF1 (hnRNP D0) binds and destabilizes mRNA	55	0.374008	1.711	0.00406504	0.025853	0.0173273	3528	tags=49%, list=25%, signal=37%	3304/3315/5721/5705/5708/7316/5698/5693/5692/5688/5700/5710/5707/3312/3303/5690/5691/5714/1981/7311/5717/5704/5720/6233/5699/5696/5694
R-HSA-5607761	Dectin-1 mediated noncanonical NF-kB signaling	59	0.3672	1.70661	0.00423729	0.0262156	0.0175704	3528	tags=46%, list=25%, signal=35%	5971/9020/4791/5721/5705/5708/7316/5698/5693/5692/5688/5700/5710/5707/9040/5690/5691/5714/7311/5970/5717/5704/5720/6233/5699/5696/5694
R-HSA-389977	Post-chaperonin tubulin folding pathway	18	0.477049	1.69576	0.0120846	0.0476792	0.0319557	1537	tags=33%, list=11%, signal=30%	7277/402/347733/7280/10381/6904
R-HSA-8964043	Plasma lipoprotein clearance	30	0.418759	1.6908	0.00328947	0.0241971	0.0162175	2481	tags=37%, list=17%, signal=30%	348/341/10062/10577/255738/23491/949/26119/51599/57552/1175
R-HSA-1474290	Collagen formation	77	0.335013	1.68724	0.00469484	0.0270472	0.0181277	2181	tags=26%, list=15%, signal=22%	4316/8985/140766/1508/4318/1307/3914/1281/131873/5034/84695/8974/1290/1295/1277/1294/169044/1300/5033/1520
R-HSA-8964038	LDL clearance	18	0.474515	1.68675	0.0120846	0.0476792	0.0319557	2875	tags=44%, list=20%, signal=36%	10577/255738/23491/26119/51599/57552/1175/3988
R-HSA-8956319	Nucleobase catabolism	30	0.416788	1.68284	0.00328947	0.0241971	0.0162175	1342	tags=27%, list=9%, signal=24%	1890/7378/2876/956/79873/131870/4860/953
R-HSA-5676590	NIK-->noncanonical NF-kB signaling	58	0.361567	1.66621	0.00431034	0.0262156	0.0175704	3528	tags=45%, list=25%, signal=34%	5971/9020/4791/5721/5705/5708/7316/5698/5693/5692/5688/5700/5710/5707/9040/5690/5691/5714/7311/5717/5704/5720/6233/5699/5696/5694
R-HSA-5357769	Caspase activation via extrinsic apoptotic signalling pathway	25	0.427547	1.63727	0.0125	0.0488739	0.0327564	1008	tags=32%, list=7%, signal=30%	8743/23643/1613/8717/356/929/148022/7186
R-HSA-5083635	Defective B3GALTL causes Peters-plus syndrome (PpS)	33	0.389457	1.60817	0.0103806	0.0431694	0.0289331	2479	tags=36%, list=17%, signal=30%	7058/10418/140766/81792/10417/170690/11093/9719/54507/7057/9507/56999
R-HSA-3781865	Diseases of glycosylation	124	0.291068	1.58351	0.00613497	0.030722	0.0205906	3546	tags=39%, list=25%, signal=29%	5476/5549/4060/7058/10418/140766/9672/10195/81792/11285/4582/79947/10417/5373/55624/79644/4585/2817/9526/170690/11093/6382/200958/4166/9719/54507/11253/8818/7057/4758/54344/9507/56999/22845/9469/3339/1798/5236/633/9060/10675/2592/2584/143662/176/6385/2683/5199
R-HSA-3906995	Diseases associated with O-glycosylation of proteins	53	0.345975	1.5706	0.00423729	0.0262156	0.0175704	2479	tags=30%, list=17%, signal=25%	7058/10418/140766/81792/4582/10417/55624/4585/170690/11093/200958/9719/54507/7057/9507/56999
R-HSA-156580	Phase II - Conjugation of compounds	74	0.310848	1.55376	0.00452489	0.0264188	0.0177065	3358	tags=39%, list=23%, signal=30%	124975/373156/2950/4257/4837/116285/2954/6820/4258/6799/8459/54578/4259/6818/79094/219970/6819/6817/50512/2952/4143/10380/191/54988/119391/9060/26873/2729/2937
R-HSA-350562	Regulation of ornithine decarboxylase (ODC)	50	0.343876	1.5532	0.004	0.025853	0.0173273	3528	tags=44%, list=25%, signal=33%	5721/5705/51686/5708/5698/5693/5692/5688/5700/5710/5707/5690/5691/4946/5714/1728/5717/5704/5720/5699/5696/5694
R-HSA-5358346	Hedgehog ligand biogenesis	61	0.326875	1.54309	0.00833333	0.0377873	0.025326	3528	tags=43%, list=25%, signal=32%	50846/5721/5705/5708/5034/7316/5698/5693/5692/5688/5700/10956/5710/85455/5707/5690/5691/5714/7311/5717/5704/5720/6233/5699/5696/5694
R-HSA-75815	Ubiquitin-dependent degradation of Cyclin D	51	0.340805	1.54195	0.00403226	0.025853	0.0173273	3576	tags=45%, list=25%, signal=34%	5721/5705/5708/7316/5698/5693/5692/5688/5700/5710/5707/5690/5691/5714/7311/5717/5704/5720/6233/5699/5696/5694/595
R-HSA-913531	Interferon Signaling	175	0.266692	1.53516	0.00847458	0.0377873	0.025326	2719	tags=34%, list=19%, signal=28%	10437/3107/3458/2634/3106/8638/3429/3123/3134/3105/4502/3430/3665/2537/3662/4261/3663/3135/3133/5371/2210/2209/4938/9470/115362/4684/163351/115361/3383/3115/7316/9636/4939/3117/960/3122/3127/9021/2633/6772/23650/7318/4599/2635/10379/2316/3113/567/91543/3437/54739/3659/1958/3119/3118/3661/9246/1981/5724/3669
R-HSA-446219	Synthesis of substrates in N-glycan biosythesis	58	0.332358	1.53161	0.00862069	0.0379194	0.0254145	2544	tags=34%, list=18%, signal=28%	51005/5476/80896/29926/256281/79947/5973/55577/5373/54187/79644/27090/10610/55808/7264/8818/4758/54344/22845/4597
R-HSA-6806667	Metabolism of fat-soluble vitamins	36	0.358848	1.52589	0.010274	0.0431694	0.0289331	438	tags=17%, list=3%, signal=16%	348/344/4023/5950/79001/9672
R-HSA-5678895	Defective CFTR causes cystic fibrosis	60	0.326578	1.52435	0.00840336	0.0377873	0.025326	3528	tags=42%, list=25%, signal=32%	5721/5705/5708/7316/5698/5693/5692/79139/5688/5700/91319/10956/5710/5707/5690/5691/5714/7311/5717/5704/5720/6233/5699/5696/5694
R-HSA-9604323	Negative regulation of NOTCH4 signaling	53	0.332247	1.50828	0.00847458	0.0377873	0.025326	3528	tags=42%, list=25%, signal=31%	5721/5705/5708/7316/5698/5693/5692/5688/5700/5710/5707/5690/5691/5714/7311/5717/5704/5720/6233/5699/5696/5694
R-HSA-211733	Regulation of activated PAK-2p34 by proteasome mediated degradation	49	0.332131	1.50763	0.00769231	0.0357692	0.0239734	3528	tags=45%, list=25%, signal=34%	5721/5705/5708/7316/5698/5693/5692/5688/5700/5710/5707/5690/5691/5714/7311/5717/5704/5720/6233/5699/5696/5694
R-HSA-3000178	ECM proteoglycans	65	0.31448	1.50483	0.012766	0.0496088	0.033249	3924	tags=40%, list=27%, signal=29%	54829/4060/1311/3687/5054/1281/4684/131873/1290/7040/1277/3679/7148/63923/1278/3339/3690/633/7448/3371/176/3913/1285/5802/7043/1289
R-HSA-9609507	Protein localization	142	0.26703	1.49282	0.00699301	0.0337218	0.0226012	3402	tags=39%, list=24%, signal=30%	373156/196743/3162/617/6804/400916/2395/1537/570/4580/51268/122970/23203/26519/1678/7316/51024/50/215/11001/291/2010/219743/3155/54543/1431/10440/1384/8266/92609/80273/84269/9409/51608/26063/26517/9381/3329/5264/150274/2671/10005/6901/10531/7311/26521/54469/10063/3421/10245/6233/10452/23480/6811/3313/10901
R-HSA-5362768	Hh mutants that don't undergo autocatalytic processing are degraded by ERAD	54	0.327429	1.49123	0.00829876	0.0377796	0.0253208	3528	tags=43%, list=25%, signal=32%	5721/5705/5708/7316/5698/5693/5692/5688/5700/10956/5710/5707/5690/5691/5714/7311/5717/5704/5720/6233/5699/5696/5694
R-HSA-2132295	MHC class II antigen presentation	111	0.269944	1.4309	0.00621118	0.0309845	0.0207666	2481	tags=30%, list=17%, signal=25%	5476/1509/10437/3902/5641/3123/1513/1512/7277/1508/972/84516/3111/1075/347733/7280/3115/10381/1759/3117/3122/3127/83547/3109/1174/3112/3113/1520/9371/6456/3119/3118/1175
R-HSA-8978868	Fatty acid metabolism	151	0.249669	1.40287	0.00714286	0.0341912	0.0229157	2838	tags=30%, list=20%, signal=24%	9261/9536/1580/80142/2877/2879/26027/1892/1573/2876/64834/873/51102/122970/80221/4706/6319/79993/5743/242/215/247/11001/6576/51703/158584/5742/1384/55289/117145/126410/4051/9524/1622/2180/35/31/1800/2194/5096/26063/5264/1376/10005/80724
R-HSA-983712	Ion channel transport	153	0.247236	1.3998	0.00714286	0.0341912	0.0229157	2322	tags=24%, list=16%, signal=20%	8992/533/57192/5349/10312/59341/255231/338440/535/527/1193/197259/6446/481/7225/23400/7316/5350/63982/7226/537/53822/245972/65268/7223/23120/1186/2040/491/6337/90423/53826/54795/9296/57194/9114/526
R-HSA-1257604	PIP3 activates AKT signaling	234	-0.290088	-1.40185	0.0087146	0.0380752	0.0255189	4597	tags=43%, list=32%, signal=30%	5716/9219/5526/4254/23035/2931/2066/331/7157/57332/5516/5682/10213/2885/153129/1460/2099/1912/84733/9542/5154/2309/5170/3556/5978/5706/2549/57521/6591/5293/2932/208/3932/23252/6045/2100/8535/143471/27327/23239/8394/23112/8396/10325/1147/4193/1386/1108/5529/1027/80012/7314/5525/10818/8658/5987/2534/5290/6015/648/50852/8822/8975/5519/8726/57690/5781/51135/1107/5594/4303/5515/81847/5931/5728/6009/54…
R-HSA-9006925	Intracellular signaling by second messengers	271	-0.288204	-1.40977	0.00431965	0.0262156	0.0175704	4597	tags=42%, list=32%, signal=29%	5716/9219/5526/4254/23035/2931/2066/331/7157/57332/5516/5578/5682/10213/2885/153129/1460/2099/1912/84733/9542/5154/2309/5170/3556/5978/5706/2549/57521/6591/5293/2932/208/5581/3932/23252/6045/2100/8535/143471/27327/23239/8394/5575/23112/113/8396/10325/5577/1147/4193/1386/1108/5529/1027/80012/7314/805/5525/10818/8658/5987/2534/5290/5582/3708/6015/814/648/50852/5566/8822/8975/5519/8726/57690/5781/53…
R-HSA-453279	Mitotic G1-G1/S phases	142	-0.313411	-1.43077	0.0104773	0.0431694	0.0289331	4294	tags=40%, list=30%, signal=28%	5516/891/983/1871/5427/5682/10213/4175/54107/890/1870/7465/1032/1031/5706/5426/91750/208/8317/5933/4149/5111/84515/1719/25/4173/896/1027/7314/7298/1875/8900/1874/51053/7153/4172/5519/10926/6502/9134/5515/902/1021/6117/5558/5928/5925/1017/5422/5934/9861/3065/7027/286826/132660/1859/26271
R-HSA-8878171	Transcriptional regulation by RUNX1	160	-0.315225	-1.45679	0.0103448	0.0431694	0.0289331	4231	tags=41%, list=30%, signal=29%	100506658/5682/10213/1460/2099/5579/1912/84733/57492/5929/4004/5706/6601/26053/6045/8535/143471/27327/25/23112/3977/83737/896/80012/7314/6015/648/2625/5588/57690/8289/5781/860/9739/2033/1387/8312/122809/861/6598/902/1021/86/55170/6929/6599/22955/10138/1459/200845/6602/25942/9861/1998/84333/1997/3065/196528/23067/865/6605/8850/55193/23429/1911/6938
R-HSA-6807070	PTEN Regulation	128	-0.33008	-1.48887	0.00816803	0.037315	0.0250094	4597	tags=45%, list=32%, signal=31%	5716/9219/331/7157/57332/5682/10213/153129/1460/1912/84733/5978/5706/57521/6591/208/23252/6045/8535/143471/27327/23112/10325/1386/1108/80012/7314/8658/5987/6015/648/8975/8726/57690/1107/5594/81847/5931/5728/6009/54815/23512/80351/10670/23186/57459/5928/51564/57504/3066/22955/1459/9861/4734/9112/3065/7874/1911
R-HSA-162906	HIV Infection	214	-0.324723	-1.55005	0.00111111	0.0166311	0.0111466	5033	tags=46%, list=35%, signal=30%	8907/9883/5711/1104/919/122706/83860/8945/8178/375/8086/2965/9978/79023/5716/2966/25978/3837/5682/137492/10213/2962/7852/51510/2968/4927/6396/5706/7175/8065/6872/3932/143471/6880/8731/920/348995/51616/4928/9688/3836/4686/926/6882/9525/6749/8905/2071/7314/164/23165/5430/1794/2958/7251/2534/51271/6883/6873/5903/6875/5431/9972/6874/3978/22916/23636/7520/8148/4869/5062/7514/902/8732/6877/8812/57122/6…
R-HSA-194315	Signaling by Rho GTPases	364	-0.310128	-1.55488	0.00104603	0.0166311	0.0111466	4694	tags=44%, list=33%, signal=30%	3895/808/8826/25791/60/79023/11004/5526/51466/2245/80728/2665/6453/10810/7533/10403/5516/116984/5578/8976/11130/2885/100271715/9475/4221/7534/5579/54820/55839/3799/9138/81565/1124/7529/81624/114793/1783/10376/80152/3985/4627/7531/394/752/55843/6396/2491/64837/5170/399/50650/25909/397/51143/57584/4628/29127/201176/91010/55789/23221/23332/10096/83540/9411/89953/54821/9183/3796/1894/57636/348995/492…
R-HSA-72306	tRNA processing	92	-0.367497	-1.56219	0.00743494	0.0352011	0.0235926	3779	tags=40%, list=26%, signal=30%	4927/6396/51002/7175/10978/127253/55253/348995/4928/9688/83480/55006/23165/25821/221078/5903/1478/283742/9972/79074/23636/1653/60487/51095/57122/91801/10762/11102/81929/23511/80746/129401/8021/23279/9836/53371/1787
R-HSA-6781827	Transcription-Coupled Nucleotide Excision Repair (TC-NER)	77	-0.373983	-1.56271	0.0101394	0.0431694	0.0289331	4620	tags=51%, list=32%, signal=34%	2965/9978/2966/57461/5427/54107/1642/2968/9318/2072/5426/64708/8451/5111/10920/10987/2071/7314/3150/5430/51426/8450/5981/5431/3978/2033/1161/902/5985/6117/9716/10714/7515/6917/5432/91603/5983/7874/2073
R-HSA-6807505	RNA polymerase II transcribes snRNA genes	67	-0.380857	-1.56498	0.0115979	0.0466065	0.0312368	3190	tags=37%, list=22%, signal=29%	57508/6880/4686/6619/6882/5430/55656/2958/92105/5431/22916/57117/6877/8812/129685/6667/6908/905/51585/5432/26512/79871/2959/2960/7702
R-HSA-8852135	Protein ubiquitination	62	-0.388383	-1.56567	0.0078637	0.0363069	0.0243337	5153	tags=60%, list=36%, signal=38%	5192/11065/55284/79577/56254/5194/7328/7321/257218/3093/5193/7319/55236/7326/6596/5111/54926/8239/92912/7336/7320/7314/8915/7323/123169/5828/56852/9781/7324/7322/23168/10670/51322/7334/5830/9646/7874
R-HSA-5250924	B-WICH complex positively regulates rRNA expression	31	-0.448438	-1.5725	0.0128023	0.0496088	0.033249	5107	tags=65%, list=36%, signal=42%	5440/10849/25885/9015/9188/60/84172/79101/2932/9013/30834/8467/2033/9031/6908/221830/23451/7913/9014/8850
R-HSA-69242	S Phase	152	-0.342647	-1.57351	0.00232019	0.0237939	0.0159472	4290	tags=41%, list=30%, signal=29%	7321/8697/5427/5682/10213/4175/1763/54107/890/157570/7465/5706/5426/91750/2932/9837/208/119504/143471/64682/4149/5111/84515/4173/996/1027/7314/84296/1875/8900/1874/4172/5981/7324/3978/29945/6502/10274/9134/902/5985/6117/23244/5558/8243/10714/5928/5925/1017/9126/10393/5422/5885/5934/9861/5983/7027/8881/286826/132660/10735/114799/23047
R-HSA-6782135	Dual incision in TC-NER	64	-0.388904	-1.58262	0.0103627	0.0431694	0.0289331	4620	tags=52%, list=32%, signal=35%	2965/9978/2966/57461/5427/54107/1642/2968/2072/5426/8451/5111/2071/7314/3150/5430/51426/8450/5981/5431/2033/1161/902/5985/6117/9716/10714/6917/5432/91603/5983/7874/2073
R-HSA-69275	G2/M Transition	181	-0.3383	-1.58651	0.0011236	0.0166311	0.0111466	4986	tags=45%, list=35%, signal=30%	5711/81027/10142/122706/8945/2305/9133/9978/5716/22974/55722/4751/7157/5516/891/983/8481/5682/10213/23354/54820/890/114791/10376/7531/7465/5706/91750/93323/23332/143471/9662/5577/3161/5048/203068/51512/1063/7314/22919/55755/8900/80321/728642/5566/984/121441/5519/85378/79441/4957/115106/22995/80184/5116/2033/10733/84131/55125/4659/5515/5108/1781/7514/902/55142/347688/5928/1017/9793/55835/9861/7995…
R-HSA-5688426	Deubiquitination	228	-0.330251	-1.58743	0.00110011	0.0166311	0.0111466	4411	tags=41%, list=31%, signal=29%	4086/7157/8473/7321/983/8737/5682/10213/63967/2099/23326/890/1540/8314/10869/7048/5706/27430/10617/8724/580/3054/63891/25862/9101/23252/54617/6478/10254/143471/51377/10454/64750/64426/51616/4798/8239/4193/7314/54764/8658/84196/91833/84132/8900/2625/8975/7046/80124/114785/6885/9958/84749/29761/2033/4303/8312/6502/9736/81847/5728/23032/171023/23358/55432/86/80351/7189/10600/55031/55288/8295/4194/75…
R-HSA-8866654	E3 ubiquitin ligases ubiquitinate target proteins	43	-0.419701	-1.58859	0.0123288	0.0483496	0.032405	4806	tags=60%, list=34%, signal=40%	79577/56254/5194/7321/257218/5193/7319/6596/5111/7336/7320/7314/8915/7323/123169/5828/56852/9781/7324/7322/23168/10670/51322/7334/5830/9646
R-HSA-5617472	Activation of anterior HOX genes in hindbrain development during early embryogenesis	56	-0.399041	-1.59132	0.00648508	0.0315878	0.0211709	2472	tags=32%, list=17%, signal=27%	5430/9611/3199/5431/8726/63925/22976/2033/1387/5931/23512/5316/23054/5928/57472/7528/5432/10664
R-HSA-5619507	Activation of HOX genes during differentiation	56	-0.399041	-1.59132	0.00648508	0.0315878	0.0211709	2472	tags=32%, list=17%, signal=27%	5430/9611/3199/5431/8726/63925/22976/2033/1387/5931/23512/5316/23054/5928/57472/7528/5432/10664
R-HSA-983231	Factors involved in megakaryocyte development and platelet production	123	-0.356785	-1.59183	0.00119617	0.0166311	0.0111466	5145	tags=52%, list=36%, signal=34%	113220/24137/23028/50808/81027/23046/3835/4602/51317/60/11004/23414/7157/85440/832/55669/3799/146909/10376/7465/81928/64837/1793/3832/3797/3833/11127/29127/89953/55582/3796/5575/285643/25/23303/3660/5577/11216/1794/7975/5566/2625/221037/55619/139818/1062/81704/829/9493/10112/25970/23348/56992/23186/347688/1017/81930/3066/5868/25942/9585/3065/5567/23468
R-HSA-4791275	Signaling by WNT in cancer	31	-0.454102	-1.59237	0.0113798	0.0462112	0.0309718	5888	tags=65%, list=41%, signal=38%	1488/1452/1499/8322/83999/5526/5516/6934/2932/4041/5529/1487/5525/8658/5519/8312/5515/80351/5528/5527
R-HSA-453274	Mitotic G2-G2/M phases	183	-0.339663	-1.59298	0.00112613	0.0166311	0.0111466	4986	tags=45%, list=35%, signal=30%	5711/81027/10142/122706/8945/2305/9133/9978/5716/22974/55722/4751/7157/5516/891/983/8481/1871/5682/10213/23354/54820/890/114791/10376/7531/7465/5706/91750/93323/23332/143471/9662/5577/3161/5048/203068/51512/1063/7314/22919/55755/8900/80321/728642/5566/984/121441/5519/85378/79441/4957/115106/22995/80184/5116/2033/10733/84131/55125/4659/5515/5108/1781/7514/902/55142/347688/5928/1017/9793/55835/9861…
R-HSA-112382	Formation of RNA Pol II elongation complex	50	-0.408307	-1.59326	0.00797872	0.0365785	0.0245158	5635	tags=62%, list=39%, signal=38%	404672/1025/2963/11198/80349/2967/5440/79577/8178/2965/2966/27125/2962/2968/85403/4686/6749/2071/5430/4300/123169/5431/22916/55677/902/8812/23168/905/6917/5432/9646
R-HSA-75955	RNA Polymerase II Transcription Elongation	50	-0.408307	-1.59326	0.00797872	0.0365785	0.0245158	5635	tags=62%, list=39%, signal=38%	404672/1025/2963/11198/80349/2967/5440/79577/8178/2965/2966/27125/2962/2968/85403/4686/6749/2071/5430/4300/123169/5431/22916/55677/902/8812/23168/905/6917/5432/9646
R-HSA-5689880	Ub-specific processing proteases	157	-0.344631	-1.59769	0.00343643	0.0244847	0.0164103	4411	tags=42%, list=31%, signal=29%	4086/7157/8737/5682/10213/63967/23326/890/1540/10869/5706/27430/8724/63891/25862/9101/6478/10254/143471/10454/64750/64426/51616/8239/4193/7314/8658/84196/91833/84132/8900/2625/8975/7046/6885/9958/84749/29761/4303/8312/6502/9736/81847/5728/23032/23358/80351/7189/10600/55031/55288/8295/4194/329/57695/4087/9100/4089/9861/8237/6314/7874/84101/7375/57599/8313
R-HSA-73893	DNA Damage Bypass	45	-0.420305	-1.60537	0.00957592	0.0412843	0.0276697	4616	tags=58%, list=32%, signal=39%	9978/124739/5427/54107/1642/5426/8451/5111/7320/7314/51426/56852/8450/5981/5980/51455/25898/5985/6117/10714/9100/7398/11201/5429/5983/57599
R-HSA-1483255	PI Metabolism	81	-0.383025	-1.60944	0.00632111	0.0311746	0.0208939	4031	tags=43%, list=28%, signal=31%	23533/375775/5867/5286/81846/80230/5293/4534/55300/5783/5297/8394/8396/8871/66036/200576/8776/9896/5290/54477/30849/5294/56623/5289/8897/8867/6305/5728/25816/54893/9107/8898/5868/22908/5287
R-HSA-6782210	Gap-filling DNA repair synthesis and ligation in TC-NER	63	-0.397596	-1.61171	0.00650195	0.0315878	0.0211709	4620	tags=52%, list=32%, signal=36%	2965/9978/2966/57461/5427/54107/1642/2968/5426/8451/5111/2071/7314/3150/5430/51426/8450/5981/5431/3978/2033/1161/902/5985/6117/9716/10714/7515/6917/5432/91603/5983/7874
R-HSA-2122947	NOTCH1 Intracellular Domain Regulates Transcription	47	-0.418473	-1.61187	0.00678426	0.0328368	0.022008	2610	tags=32%, list=18%, signal=26%	6907/7314/9611/1024/2033/1387/9794/892/51564/3066/79718/3065/10013/8850/7091
R-HSA-141405	Inhibition of the proteolytic activity of APC/C required for the onset of anaphase by mitotic spindle checkpoint components	19	-0.517718	-1.61354	0.0120664	0.0476792	0.0319557	4290	tags=63%, list=30%, signal=44%	7321/8697/119504/64682/996/4085/701/7324/29945/9184/10393/8881
R-HSA-141430	Inactivation of APC/C via direct inhibition of the APC/C complex	19	-0.517718	-1.61354	0.0120664	0.0476792	0.0319557	4290	tags=63%, list=30%, signal=44%	7321/8697/119504/64682/996/4085/701/7324/29945/9184/10393/8881
R-HSA-3214841	PKMTs methylate histone lysines	33	-0.452965	-1.61362	0.0126227	0.0492059	0.032979	4178	tags=52%, list=29%, signal=37%	55729/10919/5929/79813/56950/9869/83852/121536/64324/8726/9739/5931/23512/5928/23067/29072/79723
R-HSA-400253	Circadian Clock	65	-0.39829	-1.62501	0.00912647	0.0394773	0.0264586	2871	tags=34%, list=20%, signal=27%	5469/1386/6907/7314/80205/9611/5501/10743/1374/2908/2033/1387/96764/23411/8864/406/23054/8648/79718/1385/26224/1407
R-HSA-5654736	Signaling by FGFR1	40	-0.438604	-1.62824	0.00969529	0.041661	0.0279222	4294	tags=52%, list=30%, signal=37%	5516/2885/23767/3845/2549/10253/23768/7314/10818/5290/8822/8569/5781/4893/5335/5594/5515/10817/2260/200734/867
R-HSA-442720	CREB1 phosphorylation through the activation of Adenylate Cyclase	12	-0.591944	-1.6296	0.0123077	0.0483496	0.032405	2971	tags=50%, list=21%, signal=40%	5575/5577/805/5566/5567/1385
R-HSA-5696399	Global Genome Nucleotide Excision Repair (GG-NER)	84	-0.387032	-1.63419	0.00500626	0.0279749	0.0187494	4620	tags=50%, list=32%, signal=34%	2965/9978/60/8554/2966/5427/54778/54107/1642/2968/9318/2072/5426/64708/8451/54617/7508/5111/4798/7336/10920/10987/2071/7314/51426/8450/5981/7329/7341/3978/6613/902/5985/6117/86/10714/7515/7334/7528/54891/5983/2073
R-HSA-176187	Activation of ATR in response to replication stress	31	-0.466311	-1.63518	0.00995733	0.0426462	0.0285825	6623	tags=81%, list=46%, signal=43%	8318/144715/4171/995/4176/1111/4174/990/993/55388/4175/63967/3364/545/8317/84515/4173/4172/10926/5985/5884/6117/5810/1017/5983
R-HSA-157579	Telomere Maintenance	36	-0.454338	-1.64099	0.0084507	0.0377873	0.025326	1957	tags=50%, list=14%, signal=43%	7015/5427/1763/54107/5426/5111/5981/3978/25913/5985/6117/7014/5558/10714/5422/54386/7013/5983
R-HSA-4839743	phosphorylation site mutants of CTNNB1 are not targeted to the proteasome by the destruction complex	14	-0.568538	-1.64616	0.0105105	0.0431694	0.0289331	4539	tags=93%, list=32%, signal=63%	324/1452/1499/5526/5516/2932/5529/5525/5519/8312/5515/5528/5527
R-HSA-5339716	Misspliced GSK3beta mutants stabilize beta-catenin	14	-0.568538	-1.64616	0.0105105	0.0431694	0.0289331	4539	tags=93%, list=32%, signal=63%	324/1452/1499/5526/5516/2932/5529/5525/5519/8312/5515/5528/5527
R-HSA-5358747	S33 mutants of beta-catenin aren't phosphorylated	14	-0.568538	-1.64616	0.0105105	0.0431694	0.0289331	4539	tags=93%, list=32%, signal=63%	324/1452/1499/5526/5516/2932/5529/5525/5519/8312/5515/5528/5527
R-HSA-5358749	S37 mutants of beta-catenin aren't phosphorylated	14	-0.568538	-1.64616	0.0105105	0.0431694	0.0289331	4539	tags=93%, list=32%, signal=63%	324/1452/1499/5526/5516/2932/5529/5525/5519/8312/5515/5528/5527
R-HSA-5358751	S45 mutants of beta-catenin aren't phosphorylated	14	-0.568538	-1.64616	0.0105105	0.0431694	0.0289331	4539	tags=93%, list=32%, signal=63%	324/1452/1499/5526/5516/2932/5529/5525/5519/8312/5515/5528/5527
R-HSA-5358752	T41 mutants of beta-catenin aren't phosphorylated	14	-0.568538	-1.64616	0.0105105	0.0431694	0.0289331	4539	tags=93%, list=32%, signal=63%	324/1452/1499/5526/5516/2932/5529/5525/5519/8312/5515/5528/5527
R-HSA-5696398	Nucleotide Excision Repair	109	-0.376439	-1.65738	0.00238663	0.0237939	0.0159472	4620	tags=49%, list=32%, signal=33%	2965/9978/60/8554/2966/57461/5427/54778/54107/1642/2968/9318/2072/5426/64708/8451/54617/7508/5111/4798/7336/10920/10987/2071/7314/3150/5430/51426/8450/5981/5431/7329/7341/3978/2033/1161/6613/902/5985/6117/86/9716/10714/7515/7334/6917/7528/5432/91603/54891/5983/7874/2073
R-HSA-1474165	Reproduction	64	-0.408713	-1.66323	0.00518135	0.028345	0.0189975	3669	tags=42%, list=26%, signal=32%	545/22917/641/472/93426/10734/23353/675/56158/7329/11083/5932/11144/4292/25913/8748/10274/6117/7014/4001/8243/1017/9126/54386/5885/7013/10735
R-HSA-201722	Formation of the beta-catenin:TCF transactivating complex	28	-0.483763	-1.665	0.0115607	0.0466007	0.0312329	5183	tags=71%, list=36%, signal=46%	9070/7089/79577/6597/607/7015/4221/5929/6934/6932/83439/123169/51176/2033/10524/1387/8295/3065/7091/8313
R-HSA-195258	RHO GTPase Effectors	245	-0.344286	-1.67011	0.0010917	0.0166311	0.0111466	4772	tags=49%, list=33%, signal=33%	1058/3071/3895/808/8826/60/79023/11004/5526/51466/10810/7533/10403/5516/5578/8976/11130/2885/9475/4221/7534/5579/54820/55839/3799/81565/7529/81624/114793/1783/10376/80152/3985/4627/7531/752/6396/2491/64837/5170/25909/51143/4628/91010/23332/10096/83540/89953/54821/9183/3796/348995/4928/25/91687/25936/55143/699/55920/5048/5529/1027/9735/1063/4085/805/4690/5525/22919/10163/5586/348235/11113/5903/106…
R-HSA-6804757	Regulation of TP53 Degradation	36	-0.463454	-1.67391	0.0028169	0.0237939	0.0159472	4374	tags=58%, list=31%, signal=41%	7157/5516/983/890/5170/1616/208/472/900/4193/7314/11200/8900/5519/80196/5515/253260/1017/4194/7874/5527
R-HSA-9615017	FOXO-mediated transcription of oxidative stress, metabolic and neuronal genes	23	-0.508229	-1.67461	0.0104167	0.0431694	0.0289331	1595	tags=39%, list=11%, signal=35%	2908/4303/3066/4087/4089/25942/847/4287/3065
R-HSA-9617629	Regulation of FOXO transcriptional activity by acetylation	10	-0.645694	-1.68271	0.0107198	0.0438903	0.0294163	1536	tags=70%, list=11%, signal=63%	10628/2309/2033/4303/1387/23411/8850
R-HSA-5655862	Translesion synthesis by POLK	17	-0.555944	-1.68521	0.0120846	0.0476792	0.0319557	2982	tags=53%, list=21%, signal=42%	5111/7314/51426/5981/5980/51455/5985/6117/5983
R-HSA-167161	HIV Transcription Initiation	47	-0.437994	-1.68706	0.00407056	0.025853	0.0173273	5635	tags=66%, list=39%, signal=40%	404672/2963/2967/6878/2957/5440/83860/2965/2966/2962/2968/6872/6880/51616/6882/2071/5430/2958/6883/6873/6875/5431/6874/8148/902/6877/6908/6879/5432/2959/2960
R-HSA-167162	RNA Polymerase II HIV Promoter Escape	47	-0.437994	-1.68706	0.00407056	0.025853	0.0173273	5635	tags=66%, list=39%, signal=40%	404672/2963/2967/6878/2957/5440/83860/2965/2966/2962/2968/6872/6880/51616/6882/2071/5430/2958/6883/6873/6875/5431/6874/8148/902/6877/6908/6879/5432/2959/2960
R-HSA-73776	RNA Polymerase II Promoter Escape	47	-0.437994	-1.68706	0.00407056	0.025853	0.0173273	5635	tags=66%, list=39%, signal=40%	404672/2963/2967/6878/2957/5440/83860/2965/2966/2962/2968/6872/6880/51616/6882/2071/5430/2958/6883/6873/6875/5431/6874/8148/902/6877/6908/6879/5432/2959/2960
R-HSA-73779	RNA Polymerase II Transcription Pre-Initiation And Promoter Opening	47	-0.437994	-1.68706	0.00407056	0.025853	0.0173273	5635	tags=66%, list=39%, signal=40%	404672/2963/2967/6878/2957/5440/83860/2965/2966/2962/2968/6872/6880/51616/6882/2071/5430/2958/6883/6873/6875/5431/6874/8148/902/6877/6908/6879/5432/2959/2960
R-HSA-75953	RNA Polymerase II Transcription Initiation	47	-0.437994	-1.68706	0.00407056	0.025853	0.0173273	5635	tags=66%, list=39%, signal=40%	404672/2963/2967/6878/2957/5440/83860/2965/2966/2962/2968/6872/6880/51616/6882/2071/5430/2958/6883/6873/6875/5431/6874/8148/902/6877/6908/6879/5432/2959/2960
R-HSA-76042	RNA Polymerase II Transcription Initiation And Promoter Clearance	47	-0.437994	-1.68706	0.00407056	0.025853	0.0173273	5635	tags=66%, list=39%, signal=40%	404672/2963/2967/6878/2957/5440/83860/2965/2966/2962/2968/6872/6880/51616/6882/2071/5430/2958/6883/6873/6875/5431/6874/8148/902/6877/6908/6879/5432/2959/2960
R-HSA-1660499	Synthesis of PIPs at the plasma membrane	52	-0.432208	-1.6967	0.00395778	0.025853	0.0173273	4031	tags=46%, list=28%, signal=33%	23533/5867/5286/81846/80230/5293/4534/55300/5783/8394/8396/8871/66036/8776/5290/54477/5294/8897/8867/5728/9107/8898/5868/5287
R-HSA-196299	Beta-catenin phosphorylation cascade	16	-0.570573	-1.69828	0.00764526	0.0357325	0.0239488	4539	tags=88%, list=32%, signal=60%	324/1452/1499/5526/5516/2932/5529/10023/5525/5519/8312/5515/5528/5527
R-HSA-1169410	Antiviral mechanism by IFN-stimulated genes	76	-0.40933	-1.70312	0.00128205	0.0166311	0.0111466	3779	tags=49%, list=26%, signal=36%	4927/6396/6059/7175/1974/1977/348995/4928/9688/3836/3839/25820/7314/23165/2317/5903/3841/7324/201626/9972/5335/23636/5495/1982/57122/3716/10762/317649/81929/7334/23511/3840/129401/8021/23279/53371/4734
R-HSA-4839735	AXIN mutants destabilize the destruction complex, activating WNT signaling	13	-0.603812	-1.70313	0.00613497	0.030722	0.0205906	4539	tags=77%, list=32%, signal=53%	5526/5516/2932/5529/5525/5519/8312/5515/5528/5527
R-HSA-4839744	truncated APC mutants destabilize the destruction complex	13	-0.603812	-1.70313	0.00613497	0.030722	0.0205906	4539	tags=77%, list=32%, signal=53%	5526/5516/2932/5529/5525/5519/8312/5515/5528/5527
R-HSA-4839748	AMER1 mutants destabilize the destruction complex	13	-0.603812	-1.70313	0.00613497	0.030722	0.0205906	4539	tags=77%, list=32%, signal=53%	5526/5516/2932/5529/5525/5519/8312/5515/5528/5527
R-HSA-5467337	APC truncation mutants have impaired AXIN binding	13	-0.603812	-1.70313	0.00613497	0.030722	0.0205906	4539	tags=77%, list=32%, signal=53%	5526/5516/2932/5529/5525/5519/8312/5515/5528/5527
R-HSA-5467340	AXIN missense mutants destabilize the destruction complex	13	-0.603812	-1.70313	0.00613497	0.030722	0.0205906	4539	tags=77%, list=32%, signal=53%	5526/5516/2932/5529/5525/5519/8312/5515/5528/5527
R-HSA-5467348	Truncations of AMER1 destabilize the destruction complex	13	-0.603812	-1.70313	0.00613497	0.030722	0.0205906	4539	tags=77%, list=32%, signal=53%	5526/5516/2932/5529/5525/5519/8312/5515/5528/5527
R-HSA-5656121	Translesion synthesis by POLI	17	-0.564007	-1.70965	0.00906344	0.0393353	0.0263635	2982	tags=53%, list=21%, signal=42%	5111/7314/5981/5980/51455/5985/6117/11201/5983
R-HSA-2151201	Transcriptional activation of mitochondrial biogenesis	51	-0.436626	-1.71172	0.00397878	0.025853	0.0173273	4072	tags=49%, list=28%, signal=35%	64784/2747/5465/3054/23408/11232/5469/1386/6907/805/80205/9611/814/1387/51106/96764/23054/7019/4899/8648/2746/79718/1385/2551/2553
R-HSA-5358565	Mismatch repair (MMR) directed by MSH2:MSH6 (MutSalpha)	14	-0.591516	-1.71269	0.0045045	0.0264188	0.0177065	1777	tags=50%, list=12%, signal=44%	5111/2956/4292/3978/6117/10714/4436
R-HSA-190236	Signaling by FGFR	73	-0.415572	-1.71715	0.00127551	0.0166311	0.0111466	4294	tags=52%, list=30%, signal=37%	5516/2591/2885/4670/2962/23767/3845/2549/10253/23768/4686/7314/5430/10818/5290/83888/7073/3178/8822/8569/5431/3187/5781/4893/143282/5335/22916/5594/3185/5515/80004/10817/5725/5432/2260/200734/7072/867
R-HSA-350054	Notch-HLH transcription pathway	28	-0.499151	-1.71796	0.00867052	0.0380102	0.0254753	2610	tags=39%, list=18%, signal=32%	6907/9611/1387/9794/51564/4854/3066/79718/3065/10013/8850
R-HSA-2514853	Condensation of Prometaphase Chromosomes	11	-0.640618	-1.71897	0.00772798	0.0358072	0.0239988	4682	tags=91%, list=33%, signal=61%	64151/9133/891/983/1460/23397/9918/10592/1459/10051
R-HSA-168325	Viral Messenger RNA Synthesis	40	-0.465169	-1.72686	0.00415512	0.0262156	0.0175704	5107	tags=65%, list=36%, signal=42%	5440/9883/8086/79023/2962/4927/6396/7175/348995/4928/9688/23165/5430/5903/5431/9972/23636/57122/10762/81929/23511/5432/129401/8021/23279/53371
R-HSA-8936459	RUNX1 regulates genes involved in megakaryocyte differentiation and platelet function	28	-0.502552	-1.72966	0.00722543	0.0344598	0.0230958	1971	tags=46%, list=14%, signal=40%	27327/23112/5588/57690/9739/2033/861/55170/25942/3065/23067/865/8850
R-HSA-69190	DNA strand elongation	32	-0.489618	-1.7306	0.00421348	0.0262156	0.0175704	4198	tags=50%, list=29%, signal=35%	4175/1763/9837/5111/84515/4173/84296/4172/5981/3978/5985/6117/5558/10714/5422/5983
R-HSA-3700989	Transcriptional Regulation by TP53	323	-0.348611	-1.73151	0.00106157	0.0166311	0.0111466	4509	tags=47%, list=32%, signal=33%	22974/1353/2966/8851/7029/7157/7533/5457/5516/891/983/153129/10919/1460/1763/2962/7534/2177/890/7248/2968/7529/8550/10769/7531/83990/133746/5608/79813/91875/5563/3364/5170/545/1616/57521/580/9167/5562/54971/1121/6872/208/27113/641/56950/6880/27327/5933/23019/5111/472/51616/23112/2176/8396/10325/7296/900/6882/79733/4193/1386/7486/1108/6749/1027/8445/2071/7314/5430/11200/8621/8900/1874/6883/6873/68…
R-HSA-5620922	BBSome-mediated cargo-targeting to cilium	22	-0.526878	-1.73224	0.00730994	0.0347356	0.0232806	5028	tags=77%, list=35%, signal=50%	6608/2847/129880/55212/123016/583/6950/585/117177/10576/166379/6753/582/79738/27241/10694/54585
R-HSA-2559584	Formation of Senescence-Associated Heterochromatin Foci (SAHF)	10	-0.665104	-1.7333	0.00765697	0.0357325	0.0239488	2250	tags=60%, list=16%, signal=51%	57634/4001/5925/7290/23523/25842
R-HSA-9614085	FOXO-mediated transcription	59	-0.434041	-1.7426	0.00391645	0.025853	0.0173273	1595	tags=32%, list=11%, signal=29%	2908/604/2033/4303/1387/23411/10971/3066/4087/5934/4089/25942/847/4287/3065/901/4800/8850/4801
R-HSA-3214842	HDMs demethylate histones	20	-0.548739	-1.7432	0.00598802	0.030722	0.0205906	4191	tags=75%, list=29%, signal=53%	84678/23133/23030/7403/84159/10765/23135/9682/22992/5927/23081/8242/51780/55818/5253
R-HSA-5654738	Signaling by FGFR2	61	-0.435512	-1.74899	0.00393701	0.025853	0.0173273	2955	tags=44%, list=21%, signal=35%	10253/4686/7314/5430/10818/5290/83888/7073/3178/8822/8569/5431/3187/5781/4893/143282/5335/22916/5594/3185/5515/80004/10817/5725/5432/7072/867
R-HSA-1368082	RORA activates gene expression	17	-0.577758	-1.75133	0.00755287	0.0356088	0.0238659	2871	tags=59%, list=20%, signal=47%	5469/6907/80205/1374/2033/1387/96764/23054/8648/79718
R-HSA-174411	Polymerase switching on the C-strand of the telomere	14	-0.605708	-1.75378	0.003003	0.0237939	0.0159472	2982	tags=50%, list=21%, signal=40%	5111/5981/5985/5558/10714/5422/5983
R-HSA-69091	Polymerase switching	14	-0.605708	-1.75378	0.003003	0.0237939	0.0159472	2982	tags=50%, list=21%, signal=40%	5111/5981/5985/5558/10714/5422/5983
R-HSA-69109	Leading Strand Synthesis	14	-0.605708	-1.75378	0.003003	0.0237939	0.0159472	2982	tags=50%, list=21%, signal=40%	5111/5981/5985/5558/10714/5422/5983
R-HSA-75067	Processing of Capped Intronless Pre-mRNA	28	-0.512175	-1.76279	0.00578035	0.030722	0.0205906	3491	tags=50%, list=24%, signal=38%	10978/53981/4686/7884/10914/1478/22916/1479/23283/55339/81608/51585/11051/79869
R-HSA-1989781	PPARA activates gene expression	106	-0.402987	-1.76867	0.00120048	0.0166311	0.0111466	3244	tags=41%, list=23%, signal=32%	405/27063/4802/34/3992/81857/5469/9969/7296/10001/6907/84498/80205/9611/55090/1024/80306/9441/1374/9967/9439/2033/9412/26230/1387/96764/9282/406/23054/9968/6667/9477/892/9440/90390/23389/4899/8648/79718/4800/23097/29079/4801
R-HSA-5693554	Resolution of D-loop Structures through Synthesis-Dependent Strand Annealing (SDSA)	22	-0.538133	-1.76924	0.00584795	0.030722	0.0205906	5297	tags=73%, list=37%, signal=46%	5888/7156/672/79728/1763/7516/83990/580/641/472/7486/675/10635/5932/10524/80010
R-HSA-5685938	HDR through Single Strand Annealing (SSA)	34	-0.496861	-1.77923	0.00282486	0.0237939	0.0159472	4138	tags=59%, list=29%, signal=42%	1763/83990/3364/545/5893/580/2072/641/472/25/7486/5932/10524/80010/5985/5884/6117/5810/11073/5983
R-HSA-2299718	Condensation of Prophase Chromosomes	12	-0.646943	-1.78101	0.00461538	0.0268269	0.01798	4289	tags=83%, list=30%, signal=58%	891/983/23133/79648/6418/5925/54892/10592/23310/10051
R-HSA-5693571	Nonhomologous End-Joining (NHEJ)	30	-0.513584	-1.78838	0.00286533	0.0237939	0.0159472	3457	tags=57%, list=24%, signal=43%	580/55775/7158/55183/472/7336/27434/7341/22976/51567/10524/7520/7518/7334/9656/51720/3981
R-HSA-400206	Regulation of lipid metabolism by Peroxisome proliferator-activated receptor alpha (PPARalpha)	108	-0.406281	-1.79154	0.00118906	0.0166311	0.0111466	3244	tags=41%, list=23%, signal=32%	405/27063/4802/34/3992/81857/5469/9969/7296/10001/6907/84498/80205/9611/55090/1024/80306/9441/1374/9967/9439/2033/9412/26230/1387/96764/9282/406/23054/9968/6667/9477/892/9440/90390/23389/4899/8648/79718/25942/4800/23097/29079/4801
R-HSA-381340	Transcriptional regulation of white adipocyte differentiation	79	-0.427264	-1.79187	0.00125786	0.0166311	0.0111466	2872	tags=41%, list=20%, signal=33%	81857/5469/9969/10001/896/6907/84498/80205/9611/55090/1024/80306/9441/9967/9439/2033/9412/1387/96764/9282/27332/23054/9968/9477/892/9440/90390/23389/8648/79718/23097/29079
R-HSA-69186	Lagging Strand Synthesis	20	-0.56423	-1.79241	0.00449102	0.0264188	0.0177065	1957	tags=45%, list=14%, signal=39%	5111/5981/3978/5985/6117/5558/10714/5422/5983
R-HSA-5693537	Resolution of D-Loop Structures	26	-0.525233	-1.79334	0.00431034	0.0262156	0.0175704	5297	tags=69%, list=37%, signal=44%	5888/7156/672/79728/1763/7516/83990/580/641/472/348654/7486/675/10635/5932/10524/80010/80198
R-HSA-2559585	Oncogene Induced Senescence	30	-0.515915	-1.7965	0.00286533	0.0237939	0.0159472	4421	tags=67%, list=31%, signal=46%	7029/7157/1871/1870/1032/1031/2077/27327/23112/4193/7314/57690/5594/2114/1021/6667/5925/4194/7027/2113
R-HSA-68882	Mitotic Anaphase	184	-0.382905	-1.79657	0.0011274	0.0166311	0.0111466	4317	tags=46%, list=30%, signal=33%	10403/5516/7321/8697/11130/5682/10213/54820/55839/81565/1783/10376/80152/9700/6396/2491/5706/25909/51143/23332/119504/143471/83540/64682/54821/9183/3796/348995/4928/91687/25936/55143/699/55920/5048/5529/996/9735/1063/7314/4085/5525/22919/7443/348235/5903/1062/701/5519/5501/7324/221496/3619/29945/64105/10274/5515/1781/55055/7514/23244/4001/8243/57122/9184/347688/23421/9793/81929/9126/10393/81930/2…
R-HSA-6791312	TP53 Regulates Transcription of Cell Cycle Genes	46	-0.468886	-1.79763	0.00272851	0.0237939	0.0159472	4421	tags=61%, list=31%, signal=42%	7029/7157/891/983/890/10769/5933/23019/5111/79733/1027/8900/1874/2033/9134/9337/4869/4849/57472/1017/25904/4848/55835/5934/29883/246175/7027/144455
R-HSA-2467813	Separation of Sister Chromatids	173	-0.386046	-1.79843	0.00113766	0.0166311	0.0111466	4605	tags=49%, list=32%, signal=33%	79023/5716/11004/5526/10403/5516/7321/8697/11130/5682/10213/54820/55839/81565/1783/10376/80152/9700/6396/2491/5706/25909/51143/23332/119504/143471/83540/64682/54821/9183/3796/348995/4928/91687/25936/55143/699/55920/5048/5529/996/9735/1063/7314/4085/5525/22919/348235/5903/1062/701/5519/5501/7324/3619/29945/64105/10274/5515/1781/55055/7514/23244/8243/57122/9184/347688/23421/9793/81929/9126/10393/81…
R-HSA-113501	Inhibition of replication initiation of damaged DNA by RB1/E2F1	13	-0.639354	-1.80338	0.00306748	0.0237939	0.0159472	1944	tags=46%, list=14%, signal=40%	5519/5515/5558/5925/5422/7027
R-HSA-5693568	Resolution of D-loop Structures through Holliday Junction Intermediates	25	-0.537458	-1.80719	0.00439883	0.0264188	0.0177065	5297	tags=72%, list=37%, signal=45%	5888/7156/672/79728/1763/7516/83990/580/641/472/348654/7486/675/10635/5932/10524/80010/80198
R-HSA-5693579	Homologous DNA Pairing and Strand Exchange	37	-0.497515	-1.80837	0.00280899	0.0237939	0.0159472	5297	tags=65%, list=37%, signal=41%	5888/7156/672/79728/1763/7516/83990/3364/545/580/641/472/7486/675/10635/5932/10524/80010/5985/5884/6117/5810/11073/5983
R-HSA-5693616	Presynaptic phase of homologous DNA pairing and strand exchange	34	-0.505221	-1.80917	0.00282486	0.0237939	0.0159472	4138	tags=56%, list=29%, signal=40%	1763/7516/83990/3364/545/580/641/472/7486/675/5932/10524/80010/5985/5884/6117/5810/11073/5983
R-HSA-2555396	Mitotic Metaphase and Anaphase	185	-0.386797	-1.81472	0.0011274	0.0166311	0.0111466	4317	tags=46%, list=30%, signal=33%	10403/5516/7321/8697/11130/5682/10213/54820/55839/81565/1783/10376/80152/9700/6396/2491/5706/25909/51143/23332/119504/143471/83540/64682/54821/9183/3796/348995/4928/91687/25936/55143/699/55920/5048/5529/996/9735/1063/7314/4085/5525/22919/7443/348235/5903/1062/701/5519/5501/7324/221496/3619/29945/64105/10274/5515/1781/55055/7514/23244/4001/8243/57122/9184/347688/23421/9793/81929/9126/10393/81930/2…
R-HSA-5685942	HDR through Homologous Recombination (HRR)	58	-0.453995	-1.81711	0.0038961	0.025853	0.0173273	4229	tags=53%, list=30%, signal=38%	5427/1763/54107/7516/83990/3364/545/580/5426/641/5111/472/348654/7486/7314/675/51426/5981/10635/5932/10524/80010/5985/5884/6117/5810/10714/11073/80198/5429/5983
R-HSA-168274	Export of Viral Ribonucleoproteins from Nucleus	30	-0.522637	-1.8199	0.00286533	0.0237939	0.0159472	3779	tags=63%, list=26%, signal=47%	4927/6396/7175/348995/4928/9688/23165/5903/9972/23636/7514/57122/10762/81929/23511/129401/8021/23279/53371
R-HSA-6784531	tRNA processing in the nucleus	52	-0.463917	-1.82118	0.00263852	0.0237939	0.0159472	3779	tags=50%, list=26%, signal=37%	4927/6396/7175/10978/348995/4928/9688/23165/5903/1478/283742/9972/79074/23636/1653/51095/57122/10762/11102/81929/23511/80746/129401/8021/23279/53371
R-HSA-5620920	Cargo trafficking to the periciliary membrane	47	-0.473505	-1.82385	0.0027137	0.0237939	0.0159472	5028	tags=62%, list=35%, signal=40%	6608/378/2847/129880/55212/123016/55763/5147/192668/583/6950/585/5311/117177/10576/166379/27031/6753/582/10640/56623/84747/79738/55770/6102/200894/27241/10694/54585
R-HSA-168253	Host Interactions with Influenza Factors	38	-0.497298	-1.82436	0.00140252	0.0166311	0.0111466	5051	tags=71%, list=35%, signal=46%	8106/9883/8086/79023/3837/4927/6396/7175/348995/4928/9688/3836/3839/23165/5903/3841/9972/23636/57122/10762/81929/23511/3840/129401/8021/23279/53371
R-HSA-5693606	DNA Double Strand Break Response	38	-0.498883	-1.83018	0.00140252	0.0166311	0.0111466	5430	tags=76%, list=38%, signal=47%	2140/3838/672/5536/9025/7157/8924/8314/23030/2070/580/7158/472/25/7336/9682/7314/11200/8467/5599/7329/7341/10524/9031/7334/9656/51720/322/2138
R-HSA-113510	E2F mediated regulation of DNA replication	16	-0.615045	-1.83065	0.0030581	0.0237939	0.0159472	4421	tags=69%, list=31%, signal=48%	7029/5516/891/983/84515/5519/5515/5558/5925/5422/7027
R-HSA-432142	Platelet sensitization by LDL	16	-0.61661	-1.83531	0.0030581	0.0237939	0.0159472	2601	tags=50%, list=18%, signal=41%	5529/5525/5519/5781/5515/1432/5528/5527
R-HSA-167172	Transcription of the HIV genome	62	-0.455836	-1.83759	0.00262123	0.0237939	0.0159472	5635	tags=68%, list=39%, signal=41%	404672/1025/2963/11198/2967/6878/2957/5440/83860/8178/2965/2966/2962/2968/6872/6880/8731/51616/4686/6882/6749/2071/5430/2958/6883/6873/6875/5431/6874/22916/8148/902/8732/6877/8812/6908/905/6879/6917/5432/2959/2960
R-HSA-191859	snRNP Assembly	49	-0.4763	-1.84593	0.00269542	0.0237939	0.0159472	5365	tags=67%, list=38%, signal=42%	50628/6606/10073/9883/8086/79023/25929/54960/4927/6396/51808/7175/348995/4928/9688/4686/23165/5903/9972/1207/22916/23636/96764/6607/57122/10762/11218/81929/23511/129401/8021/23279/53371
R-HSA-194441	Metabolism of non-coding RNA	49	-0.4763	-1.84593	0.00269542	0.0237939	0.0159472	5365	tags=67%, list=38%, signal=42%	50628/6606/10073/9883/8086/79023/25929/54960/4927/6396/51808/7175/348995/4928/9688/4686/23165/5903/9972/1207/22916/23636/96764/6607/57122/10762/11218/81929/23511/129401/8021/23279/53371
R-HSA-3214858	RMTs methylate histone arginines	28	-0.536727	-1.84729	0.00289017	0.0237939	0.0159472	1888	tags=39%, list=13%, signal=34%	10196/8289/6598/5931/86/55170/6599/6602/196528/6605/55193
R-HSA-5578749	Transcriptional regulation by small RNAs	41	-0.495845	-1.85127	0.00138122	0.0166311	0.0111466	3779	tags=56%, list=26%, signal=41%	4927/6396/7175/27327/348995/4928/9688/23165/5430/5903/10526/5431/9972/23636/57122/10762/81929/23511/5432/129401/8021/23279/53371
R-HSA-5693565	Recruitment and ATM-mediated phosphorylation of repair and signaling proteins at DNA double strand breaks	37	-0.509368	-1.85145	0.00140449	0.0166311	0.0111466	4769	tags=70%, list=33%, signal=47%	5536/9025/7157/8924/8314/23030/2070/580/7158/472/25/7336/9682/7314/11200/8467/5599/7329/7341/10524/9031/7334/9656/51720/322/2138
R-HSA-2559580	Oxidative Stress Induced Senescence	60	-0.464941	-1.86791	0.0013089	0.0166311	0.0111466	4421	tags=65%, list=31%, signal=45%	7029/7157/57332/1871/1912/84733/1870/8550/5608/4217/7867/1032/1031/6045/8535/27327/5601/23112/4193/23135/80012/7314/6015/648/5599/8726/57690/6416/5594/5931/1432/1021/23512/9448/5928/4194/22955/7027/1911
R-HSA-73762	RNA Polymerase I Transcription Initiation	47	-0.487682	-1.87845	0.00135685	0.0166311	0.0111466	5107	tags=68%, list=36%, signal=44%	5440/10849/25885/9015/2965/9219/2966/84172/10919/2968/79101/9013/7343/1108/30834/2071/54700/1107/5931/902/54815/6908/57459/5928/221830/57504/3066/9112/3065/9014/7270/8850
R-HSA-1221632	Meiotic synapsis	30	-0.540407	-1.88178	0.00286533	0.0237939	0.0159472	2804	tags=53%, list=20%, signal=43%	93426/10734/23353/56158/7329/11083/25913/10274/7014/4001/8243/9126/54386/5885/7013/10735
R-HSA-162599	Late Phase of HIV Life Cycle	121	-0.422747	-1.88299	0.00119617	0.0166311	0.0111466	3085	tags=64%, list=22%, signal=51%	5901/23327/404672/1025/2963/11198/91782/2967/6878/2957/5440/9883/1104/83860/8178/8086/2965/79023/2966/25978/137492/2962/51510/2968/4927/6396/7175/6872/6880/8731/348995/51616/4928/9688/4686/6882/9525/6749/2071/7314/23165/5430/2958/7251/51271/6883/6873/5903/6875/5431/9972/6874/22916/23636/8148/7514/902/8732/6877/8812/57122/6908/905/10015/10762/81929/23511/6879/6917/5432/9397/129401/8021/2959/23279/…
R-HSA-1169408	ISG15 antiviral mechanism	68	-0.4602	-1.89165	0.0012837	0.0166311	0.0111466	3779	tags=53%, list=26%, signal=39%	8672/4927/6396/7175/1974/1977/348995/4928/9688/3836/3839/25820/7314/23165/2317/5903/3841/7324/9972/5335/23636/5495/1982/57122/3716/10762/317649/81929/7334/23511/3840/129401/8021/23279/53371/4734
R-HSA-5250941	Negative epigenetic regulation of rRNA expression	49	-0.488178	-1.89197	0.00269542	0.0237939	0.0159472	5107	tags=65%, list=36%, signal=42%	5440/10849/25885/9015/2965/2966/84172/2968/79101/51742/9013/7343/64426/30834/11176/2071/79685/8467/1786/902/23411/6908/8932/1789/221830/3066/25942/3065/9014/79595/7270/10284
R-HSA-674695	RNA Polymerase II Pre-transcription Events	73	-0.45796	-1.8923	0.00127551	0.0166311	0.0111466	5635	tags=67%, list=39%, signal=41%	404672/1025/2963/11198/80349/2967/6878/2957/5440/83860/79577/8178/2965/2966/27125/2962/2968/6872/6880/85403/51616/4686/6882/6749/2071/5430/4300/2958/6883/6873/123169/6875/5431/6874/22916/8148/55677/902/6877/8812/23168/6908/905/6879/6917/5432/2959/9646/2960
R-HSA-168276	NS1 Mediated Effects on Host Pathways	36	-0.524878	-1.89577	0.0028169	0.0237939	0.0159472	5051	tags=75%, list=35%, signal=49%	8106/9883/8086/79023/3837/4927/6396/7175/348995/4928/9688/3836/3839/23165/5903/3841/9972/23636/57122/10762/81929/23511/3840/129401/8021/23279/53371
R-HSA-4655427	SUMOylation of DNA methylation proteins	16	-0.636976	-1.89593	0.00152905	0.0166311	0.0111466	4320	tags=88%, list=30%, signal=61%	57332/1912/84733/6045/8535/80012/6015/648/7329/7341/1786/1789/22955/1911
R-HSA-165054	Rev-mediated nuclear export of HIV RNA	31	-0.543769	-1.90679	0.00284495	0.0237939	0.0159472	5005	tags=74%, list=35%, signal=48%	9883/1104/8086/79023/4927/6396/7175/348995/4928/9688/23165/5903/9972/23636/7514/57122/10762/81929/23511/129401/8021/23279/53371
R-HSA-2559586	DNA Damage/Telomere Stress Induced Senescence	27	-0.558864	-1.91266	0.001443	0.0166311	0.0111466	2978	tags=59%, list=21%, signal=47%	472/1027/57634/8900/10524/25913/9134/7014/4001/5925/1017/7290/23523/54386/7013/25842
R-HSA-2980766	Nuclear Envelope Breakdown	47	-0.497092	-1.9147	0.00135685	0.0166311	0.0111466	4660	tags=70%, list=33%, signal=47%	9133/8086/140609/79023/891/983/5578/5579/4927/6396/7175/9663/348995/4928/9688/23165/7443/91754/5903/9972/221496/23636/4001/57122/10762/81929/23511/23592/129401/8021/23279/53371/7112
R-HSA-427413	NoRC negatively regulates rRNA expression	46	-0.499513	-1.91505	0.00136426	0.0166311	0.0111466	5107	tags=67%, list=36%, signal=43%	5440/10849/25885/9015/2965/2966/84172/2968/79101/51742/9013/7343/64426/30834/11176/2071/79685/8467/1786/902/6908/8932/1789/221830/3066/25942/3065/9014/79595/7270/10284
R-HSA-73864	RNA Polymerase I Transcription	50	-0.492594	-1.92215	0.00132979	0.0166311	0.0111466	5107	tags=68%, list=36%, signal=44%	5440/10849/25885/9015/2965/9219/2966/84172/10919/2968/79101/9013/7343/1108/30834/2071/54700/11335/1107/5931/902/54815/6908/57459/8932/5928/221830/57504/3066/9112/3065/9014/7270/8850
R-HSA-73854	RNA Polymerase I Promoter Clearance	50	-0.492594	-1.92215	0.00132979	0.0166311	0.0111466	5107	tags=68%, list=36%, signal=44%	5440/10849/25885/9015/2965/9219/2966/84172/10919/2968/79101/9013/7343/1108/30834/2071/54700/11335/1107/5931/902/54815/6908/57459/8932/5928/221830/57504/3066/9112/3065/9014/7270/8850
R-HSA-110330	Recognition and association of DNA glycosylase with site containing an affected purine	10	-0.743684	-1.93808	0.00153139	0.0166311	0.0111466	2237	tags=70%, list=16%, signal=59%	55247/4595/25913/7014/54386/7013/4968
R-HSA-110331	Cleavage of the damaged purine	10	-0.743684	-1.93808	0.00153139	0.0166311	0.0111466	2237	tags=70%, list=16%, signal=59%	55247/4595/25913/7014/54386/7013/4968
R-HSA-73927	Depurination	10	-0.743684	-1.93808	0.00153139	0.0166311	0.0111466	2237	tags=70%, list=16%, signal=59%	55247/4595/25913/7014/54386/7013/4968
R-HSA-77595	Processing of Intronless Pre-mRNAs	19	-0.623426	-1.943	0.0015083	0.0166311	0.0111466	3491	tags=68%, list=24%, signal=52%	10978/53981/4686/10914/1478/22916/1479/23283/55339/81608/51585/11051/79869
R-HSA-6804756	Regulation of TP53 Activity through Phosphorylation	88	-0.458236	-1.94379	0.00124378	0.0166311	0.0111466	4509	tags=56%, list=32%, signal=38%	22974/8851/7157/1460/1763/890/8550/83990/5563/3364/545/580/5562/6872/641/6880/472/51616/6882/4193/7486/6749/8445/7314/11200/8900/6883/6873/6875/5932/6874/94241/10524/8148/80010/5985/1432/5884/6117/6877/5810/6908/11073/1017/6879/4194/1459/5983/204851
R-HSA-6804115	TP53 regulates transcription of additional cell cycle genes whose exact role in the p53 pathway remain uncertain	18	-0.632999	-1.94412	0.00149031	0.0166311	0.0111466	1367	tags=50%, list=10%, signal=45%	9337/4869/4849/57472/25904/4848/55835/29883/246175
R-HSA-3215018	Processing and activation of SUMO	10	-0.746758	-1.94609	0.00153139	0.0166311	0.0111466	1836	tags=70%, list=13%, signal=61%	7329/7341/6613/205564/25950/29843/10054
R-HSA-9005891	Loss of function of MECP2 in Rett syndrome	14	-0.673301	-1.94949	0.0015015	0.0166311	0.0111466	2610	tags=57%, list=18%, signal=47%	6907/805/9611/814/5566/79718/25942/3065
R-HSA-9005895	Pervasive developmental disorders	14	-0.673301	-1.94949	0.0015015	0.0166311	0.0111466	2610	tags=57%, list=18%, signal=47%	6907/805/9611/814/5566/79718/25942/3065
R-HSA-212300	PRC2 methylates histones and DNA	13	-0.69146	-1.95035	0.00153374	0.0166311	0.0111466	2211	tags=69%, list=15%, signal=59%	121536/8726/5931/1786/23512/1789/5928/3720/22823
R-HSA-606279	Deposition of new CENPA-containing nucleosomes at the centromere	21	-0.604453	-1.95087	0.00148588	0.0166311	0.0111466	4772	tags=76%, list=33%, signal=51%	1058/387103/55839/80152/2491/11339/91687/55355/8467/64105/51773/4869/5931/23421/5928/55166
R-HSA-774815	Nucleosome assembly	21	-0.604453	-1.95087	0.00148588	0.0166311	0.0111466	4772	tags=76%, list=33%, signal=51%	1058/387103/55839/80152/2491/11339/91687/55355/8467/64105/51773/4869/5931/23421/5928/55166
R-HSA-3232142	SUMOylation of ubiquitinylation proteins	35	-0.542696	-1.95095	0.00284091	0.0237939	0.0159472	5101	tags=80%, list=36%, signal=52%	9063/9883/8086/79023/8554/4927/6396/7175/348995/4928/9688/4193/23165/5987/7428/5903/7329/7341/9972/23636/57122/10762/81929/23511/129401/8021/23279/53371
R-HSA-211000	Gene Silencing by RNA	61	-0.487044	-1.95594	0.00131234	0.0166311	0.0111466	3779	tags=54%, list=26%, signal=40%	4927/6396/8575/7175/54487/27327/348995/4928/9688/23112/4603/23165/5430/7247/5903/23405/10526/5431/57690/144233/9972/23636/143689/57122/10762/81929/23511/5432/11022/129401/8021/23279/53371
R-HSA-1362300	Transcription of E2F targets under negative control by p107 (RBL1) and p130 (RBL2) in complex with HDAC1	16	-0.658222	-1.95917	0.00152905	0.0166311	0.0111466	4421	tags=81%, list=31%, signal=56%	7029/983/890/91750/5933/1875/1874/5928/5934/3065/7027/286826/132660
R-HSA-177243	Interactions of Rev with host cellular proteins	33	-0.550782	-1.96208	0.00280505	0.0237939	0.0159472	5005	tags=76%, list=35%, signal=49%	9883/1104/8086/79023/3837/4927/6396/7175/348995/4928/9688/23165/5903/9972/23636/4869/7514/57122/10762/81929/23511/129401/8021/23279/53371
R-HSA-69205	G1/S-Specific Transcription	27	-0.574102	-1.96481	0.001443	0.0166311	0.0111466	3427	tags=59%, list=24%, signal=45%	91750/5933/5111/1719/7298/1875/8900/1874/5928/5422/5934/3065/7027/286826/132660/26271
R-HSA-162587	HIV Life Cycle	134	-0.435716	-1.96711	0.00117509	0.0166311	0.0111466	3085	tags=43%, list=22%, signal=34%	6880/8731/920/348995/51616/4928/9688/3836/4686/6882/9525/6749/2071/7314/23165/5430/2958/7251/51271/6883/6873/5903/6875/5431/9972/6874/3978/22916/23636/7520/8148/7514/902/8732/6877/8812/57122/6908/905/10015/7518/10762/81929/23511/6879/6917/5432/9397/129401/8021/2959/23279/53371/2960/51534/3981/11168
R-HSA-6804758	Regulation of TP53 Activity through Acetylation	28	-0.571892	-1.96832	0.00144509	0.0166311	0.0111466	2787	tags=57%, list=19%, signal=46%	8396/1108/27154/23774/2033/1107/5931/54815/57459/5928/3066/64769/84289/3065/29117/7862
R-HSA-5693607	Processing of DNA double-strand break ends	57	-0.495973	-1.9743	0.00130719	0.0166311	0.0111466	4184	tags=60%, list=29%, signal=42%	63967/1763/890/8924/83990/3364/545/580/151987/7158/641/8914/472/6047/7336/7486/7314/8900/7329/5932/7341/10524/6613/80010/5985/5884/6117/5810/11073/1017/7334/9656/51720/5983
R-HSA-5693538	Homology Directed Repair	91	-0.468603	-1.99153	0.00123762	0.0166311	0.0111466	4229	tags=57%, list=30%, signal=41%	5427/63967/1763/54107/890/8924/7516/83990/3364/545/5893/580/2072/5426/151987/7158/10721/641/8914/5111/472/25/348654/6047/7336/7486/7314/675/8900/51426/5981/10635/7329/5932/7341/10524/6613/80010/5985/5884/6117/5810/10714/11073/1017/7515/7334/80198/9656/51720/5429/5983
R-HSA-69620	Cell Cycle Checkpoints	233	-0.41276	-1.99408	0.00108932	0.0166311	0.0111466	4687	tags=54%, list=33%, signal=37%	9025/55388/9133/79023/5716/11004/5526/7157/7533/10403/5516/7321/891/983/8697/11130/5682/10213/4175/63967/1763/7534/54820/55839/890/8924/81565/7529/1783/80152/7531/83990/7465/3364/6396/2491/545/5706/25909/580/51143/7158/641/23332/119504/8317/143471/83540/64682/54821/9183/3796/472/348995/4928/84515/91687/4173/25936/55143/699/55920/7336/4193/7486/5048/5529/996/1027/9735/51512/1063/7314/4085/11200/55…
R-HSA-1500620	Meiosis	51	-0.509196	-1.99622	0.00132626	0.0166311	0.0111466	3204	tags=47%, list=22%, signal=37%	641/472/93426/10734/23353/675/56158/7329/11083/5932/11144/4292/25913/10274/6117/7014/4001/8243/1017/9126/54386/5885/7013/10735
R-HSA-73886	Chromosome Maintenance	56	-0.501101	-1.99832	0.00129702	0.0166311	0.0111466	4772	tags=61%, list=33%, signal=41%	1058/387103/7015/5427/1763/54107/55839/80152/2491/5426/11339/5111/91687/55355/8467/5981/3978/64105/25913/51773/4869/5931/5985/6117/7014/5558/10714/23421/5928/5422/54386/7013/5983/55166
R-HSA-73856	RNA Polymerase II Transcription Termination	52	-0.509889	-2.00165	0.00131926	0.0166311	0.0111466	3491	tags=50%, list=24%, signal=38%	10978/53981/84321/80145/4686/7884/84271/10914/9877/57187/1478/84248/22916/1479/4116/51362/10250/9785/23283/55339/11338/10569/81608/51585/11051/79869
R-HSA-69473	G2/M DNA damage checkpoint	54	-0.506621	-2.0021	0.00131406	0.0166311	0.0111466	4374	tags=63%, list=31%, signal=44%	7157/7533/891/983/1763/7534/8924/7529/7531/83990/7465/3364/545/580/7158/641/472/7336/7486/11200/5932/7341/10524/80010/5985/5884/6117/5810/10971/11073/7334/9656/51720/5983
R-HSA-180746	Nuclear import of Rev protein	30	-0.575129	-2.00269	0.00143266	0.0166311	0.0111466	5005	tags=80%, list=35%, signal=52%	9883/1104/8086/79023/3837/4927/6396/7175/348995/4928/9688/23165/5903/9972/23636/4869/57122/10762/81929/23511/129401/8021/23279/53371
R-HSA-1362277	Transcription of E2F targets under negative control by DREAM complex	19	-0.643197	-2.00461	0.0015083	0.0166311	0.0111466	3427	tags=68%, list=24%, signal=52%	91750/5933/4149/5111/1875/1874/7153/5928/5934/3065/7027/286826/132660
R-HSA-2565942	Regulation of PLK1 Activity at G2/M Transition	79	-0.478704	-2.0076	0.00125786	0.0166311	0.0111466	4872	tags=57%, list=34%, signal=38%	10142/8945/9133/55722/4751/891/983/8481/23354/54820/7531/93323/23332/9662/5577/5048/203068/7314/22919/55755/80321/5566/121441/79441/4957/115106/22995/80184/5116/10733/84131/55125/4659/5108/1781/55142/9793/55835/79959/80254/54801/22981/7840/9702/11116
R-HSA-176033	Interactions of Vpr with host cellular proteins	33	-0.564654	-2.0115	0.00280505	0.0237939	0.0159472	3779	tags=61%, list=26%, signal=45%	4927/6396/7175/348995/4928/9688/3836/23165/5903/9972/23636/57122/10762/81929/23511/129401/8021/23279/53371/11168
R-HSA-5250913	Positive epigenetic regulation of rRNA expression	46	-0.524737	-2.01175	0.00136426	0.0166311	0.0111466	5107	tags=74%, list=36%, signal=48%	5440/10849/25885/9015/9188/60/9219/84172/10919/79101/2932/9013/1108/30834/8467/11335/2033/1107/5931/54815/9031/6908/57459/5928/221830/57504/3066/23451/7913/9112/3065/9014/7270/8850
R-HSA-170822	Regulation of Glucokinase by Glucokinase Regulatory Protein	27	-0.588032	-2.01248	0.001443	0.0166311	0.0111466	4655	tags=81%, list=33%, signal=55%	9883/8086/79023/2645/4927/6396/7175/348995/4928/9688/23165/5903/9972/23636/57122/10762/81929/23511/129401/8021/23279/53371
R-HSA-5619107	Defective TPR may confer susceptibility towards thyroid papillary carcinoma (TPC)	27	-0.588032	-2.01248	0.001443	0.0166311	0.0111466	4655	tags=81%, list=33%, signal=55%	9883/8086/79023/2645/4927/6396/7175/348995/4928/9688/23165/5903/9972/23636/57122/10762/81929/23511/129401/8021/23279/53371
R-HSA-168333	NEP/NS2 Interacts with the Cellular Export Machinery	28	-0.586146	-2.01738	0.00144509	0.0166311	0.0111466	3779	tags=68%, list=26%, signal=50%	4927/6396/7175/348995/4928/9688/23165/5903/9972/23636/7514/57122/10762/81929/23511/129401/8021/23279/53371
R-HSA-5663220	RHO GTPases Activate Formins	125	-0.451718	-2.02666	0.00118765	0.0166311	0.0111466	4610	tags=62%, list=32%, signal=42%	147841/23002/1729/57405/81027/1856/1058/60/79023/11004/5526/51466/10403/5516/11130/54820/55839/81565/81624/114793/1783/10376/80152/752/6396/2491/25909/51143/91010/23332/83540/54821/9183/3796/348995/4928/91687/25936/55143/699/55920/5048/5529/9735/1063/4085/5525/22919/348235/5903/1062/701/5519/5501/6722/71/3619/64105/5515/1781/55055/7514/57122/9184/347688/23421/9793/81929/81930/23122/387/5528/23279…
R-HSA-9022692	Regulation of MECP2 expression and activity	28	-0.58893	-2.02696	0.00144509	0.0166311	0.0111466	3042	tags=50%, list=21%, signal=39%	27327/23112/6907/805/9611/814/5566/57690/3066/79718/25942/3930/3065/1385
R-HSA-8943724	Regulation of PTEN gene transcription	54	-0.513827	-2.03058	0.00131406	0.0166311	0.0111466	4566	tags=65%, list=32%, signal=44%	9219/7157/57332/153129/1912/84733/5978/57521/6591/6045/8535/10325/1386/1108/80012/6015/648/8726/1107/5594/5931/6009/54815/23512/10670/23186/57459/5928/51564/57504/3066/22955/9112/3065/1911
R-HSA-5693567	HDR through Homologous Recombination (HRR) or Single Strand Annealing (SSA)	85	-0.481188	-2.03164	0.00125313	0.0166311	0.0111466	4229	tags=59%, list=30%, signal=42%	5427/63967/1763/54107/890/8924/7516/83990/3364/545/5893/580/2072/5426/151987/7158/641/8914/5111/472/25/348654/6047/7336/7486/7314/675/8900/51426/5981/10635/7329/5932/7341/10524/6613/80010/5985/5884/6117/5810/10714/11073/1017/7334/80198/9656/51720/5429/5983
R-HSA-168271	Transport of Ribonucleoproteins into the Host Nucleus	28	-0.591216	-2.03483	0.00144509	0.0166311	0.0111466	4655	tags=79%, list=33%, signal=53%	8086/79023/3837/4927/6396/7175/348995/4928/9688/3836/23165/5903/9972/23636/57122/10762/81929/23511/129401/8021/23279/53371
R-HSA-2559583	Cellular Senescence	119	-0.460176	-2.04743	0.0011976	0.0166311	0.0111466	4421	tags=62%, list=31%, signal=43%	7029/7157/57332/7321/8697/1871/10919/6197/1912/84733/890/1870/8550/5608/79813/4217/7867/1032/1031/6196/2077/6045/8535/119504/64682/27327/472/5601/23112/4193/23135/996/1027/80012/7314/57634/8900/6015/648/5599/8726/57690/7324/6416/29945/10524/5594/25913/9134/2114/5931/1432/1021/7014/23512/4001/6667/9448/5928/5925/1017/7290/10393/23523/4194/54386/22955/7013/5598/7027/8881/2113/25842/1911
R-HSA-73894	DNA Repair	263	-0.42311	-2.06013	0.00108932	0.0166311	0.0111466	4711	tags=55%, list=33%, signal=38%	64421/9025/79728/2965/9978/60/124739/54962/8554/2966/7374/57461/7157/5427/54890/63967/1763/54778/54107/2177/890/8924/1642/8505/2968/7516/8314/83990/3364/23030/545/5893/9318/2070/2187/580/2072/5426/55775/151987/64708/7158/10721/641/10973/8451/54617/55183/7508/8914/5111/472/4798/79661/25/2176/348654/6047/7336/7486/10920/10987/9682/2071/7320/7314/3150/5430/27434/11200/55120/675/55247/8900/51426/8467…
R-HSA-380320	Recruitment of NuMA to mitotic centrosomes	82	-0.489727	-2.06985	0.00124688	0.0166311	0.0111466	4476	tags=55%, list=31%, signal=38%	55722/4751/983/8481/23354/54820/114791/10376/7531/93323/23332/9662/5577/5048/203068/4926/22919/55755/80321/5566/121441/85378/79441/4957/115106/22995/80184/5116/10733/84131/55125/5108/1781/55142/347688/9793/55835/79959/10426/80254/54801/22981/7840/9702/11116
R-HSA-3301854	Nuclear Pore Complex (NPC) Disassembly	32	-0.588412	-2.07979	0.00140449	0.0166311	0.0111466	4660	tags=78%, list=33%, signal=53%	9133/8086/140609/79023/891/983/4927/6396/7175/348995/4928/9688/23165/91754/5903/9972/23636/57122/10762/81929/23511/129401/8021/23279/53371
R-HSA-180910	Vpr-mediated nuclear import of PICs	30	-0.598081	-2.08261	0.00143266	0.0166311	0.0111466	3779	tags=67%, list=26%, signal=49%	4927/6396/7175/348995/4928/9688/3836/23165/5903/9972/23636/57122/10762/81929/23511/129401/8021/23279/53371/11168
R-HSA-1538133	G0 and Early G1	27	-0.611607	-2.09317	0.001443	0.0166311	0.0111466	4421	tags=74%, list=31%, signal=51%	7029/983/890/91750/5933/4149/5111/1875/8900/1874/7153/9134/5928/1017/5934/3065/7027/286826/132660/1859
R-HSA-5633007	Regulation of TP53 Activity	150	-0.457459	-2.0961	0.00116414	0.0166311	0.0111466	4566	tags=57%, list=32%, signal=39%	9219/22974/8851/7157/5457/5516/983/10919/1460/1763/890/8550/83990/133746/5608/79813/91875/5563/3364/5170/545/1616/580/5562/54971/6872/208/641/56950/6880/472/51616/8396/900/6882/4193/7486/1108/6749/8445/7314/11200/8900/6883/6873/6875/5519/27154/5932/23774/80196/6874/94241/2033/10524/8148/1107/5515/5931/80010/5985/1432/54815/5884/6117/6877/5810/6908/57459/11073/5928/253260/1017/6879/4194/3066/1459/…
R-HSA-1852241	Organelle biogenesis and maintenance	251	-0.432924	-2.1009	0.00109409	0.0166311	0.0111466	4529	tags=51%, list=32%, signal=35%	129880/55212/55722/4751/56912/123016/55763/983/8481/26146/54927/23354/3842/54820/79989/64784/5147/51626/10376/192668/2747/7531/5465/5563/150737/51259/3797/91147/9657/3054/93323/583/79598/11127/6950/585/23332/5311/117177/23408/9662/9742/11232/10576/5469/261734/166379/5577/1386/5048/6907/203068/79659/27031/805/6753/80205/22919/55755/582/9611/814/80321/5566/121441/10640/79441/56623/54806/84747/4957/…
R-HSA-429947	Deadenylation of mRNA	21	-0.652256	-2.10516	0.00148588	0.0166311	0.0111466	3503	tags=71%, list=24%, signal=54%	26986/1974/1977/23019/9924/10605/1975/9337/4849/57472/25904/4848/29883/246175/255967
R-HSA-4085377	SUMOylation of SUMOylation proteins	31	-0.604191	-2.11867	0.00142248	0.0166311	0.0111466	3779	tags=71%, list=26%, signal=52%	4927/6396/7175/348995/4928/9688/23165/5903/7329/7341/9972/23636/10210/6613/57122/10762/81929/23511/129401/8021/23279/53371
R-HSA-8953750	Transcriptional Regulation by E2F6	34	-0.594957	-2.13051	0.00141243	0.0166311	0.0111466	3206	tags=62%, list=22%, signal=48%	6045/8317/4149/80012/6015/648/5932/8726/11335/80314/5931/23269/23512/317/5928/84108/10138/7027/23429/1911/23468
R-HSA-4615885	SUMOylation of DNA replication proteins	42	-0.568978	-2.13338	0.00137931	0.0166311	0.0111466	3779	tags=64%, list=26%, signal=47%	4927/6396/7175/5111/348995/4928/9688/55143/23165/7153/5903/7329/7341/9972/7150/3619/23636/6613/57122/10762/81929/23511/129401/8021/23279/53371/7155
R-HSA-159231	Transport of Mature mRNA Derived from an Intronless Transcript	37	-0.587439	-2.13523	0.00140449	0.0166311	0.0111466	3779	tags=68%, list=26%, signal=50%	4927/6396/7175/53981/1977/348995/4928/9688/4686/23165/5903/9972/22916/23636/10482/55339/57122/10762/81608/81929/23511/129401/8021/23279/53371
R-HSA-72187	mRNA 3'-end processing	43	-0.564983	-2.13849	0.00136986	0.0166311	0.0111466	3491	tags=58%, list=24%, signal=44%	10978/53981/84321/80145/4686/84271/10914/9877/57187/1478/84248/22916/1479/4116/51362/10250/9785/23283/55339/11338/10569/81608/51585/11051/79869
R-HSA-68875	Mitotic Prophase	75	-0.51551	-2.14097	0.00128205	0.0166311	0.0111466	4660	tags=68%, list=33%, signal=46%	9133/8086/140609/79023/5516/891/983/5578/5579/8548/23133/4927/6396/7175/8615/9663/348995/4928/9688/26003/79648/23165/4926/7443/91754/5903/5519/9972/84930/10776/221496/23636/5594/5515/4001/57122/6418/5925/54892/10762/81929/10592/23511/23592/23310/129401/8021/23279/53371/7112/10051
R-HSA-159227	Transport of the SLBP independent Mature mRNA	30	-0.615641	-2.14376	0.00143266	0.0166311	0.0111466	3779	tags=73%, list=26%, signal=54%	4927/6396/7175/1977/348995/4928/9688/4686/23165/5903/9972/22916/23636/10482/57122/10762/81929/23511/129401/8021/23279/53371
R-HSA-5693532	DNA Double-Strand Break Repair	119	-0.481829	-2.14377	0.0011976	0.0166311	0.0111466	4769	tags=64%, list=33%, signal=43%	5536/64421/9025/79728/54962/7157/5427/63967/1763/54107/890/8924/7516/8314/83990/3364/23030/545/5893/2070/580/2072/5426/55775/151987/7158/10721/641/55183/8914/5111/472/25/348654/6047/7336/7486/9682/7314/27434/11200/675/8900/51426/8467/5599/5981/10635/7329/5932/7341/22976/51567/10524/7520/6613/80010/5985/5884/6117/5810/9031/10714/11073/7518/1017/7515/7334/80198/9656/51720/322/2138/5429/5983/3981
R-HSA-427389	ERCC6 (CSB) and EHMT2 (G9a) positively regulate rRNA expression	16	-0.722424	-2.15026	0.00152905	0.0166311	0.0111466	1681	tags=69%, list=12%, signal=61%	11335/1107/5931/54815/57459/5928/57504/3066/9112/3065/7270
R-HSA-2468052	Establishment of Sister Chromatid Cohesion	10	-0.825475	-2.15123	0.00153139	0.0166311	0.0111466	1406	tags=80%, list=10%, signal=72%	10274/23244/8243/9126/5885/10735/114799/23047
R-HSA-429914	Deadenylation-dependent mRNA decay	51	-0.550179	-2.15688	0.00132626	0.0166311	0.0111466	3503	tags=53%, list=24%, signal=40%	26986/1974/219988/1977/23019/5393/51010/9652/9924/10605/11340/22894/54464/196513/1975/9337/4849/55802/57472/25904/4848/1656/29883/246175/255967/10767/167227
R-HSA-3214815	HDACs deacetylate histones	32	-0.612825	-2.16608	0.00140449	0.0166311	0.0111466	3647	tags=62%, list=26%, signal=47%	5978/51742/64426/1108/6907/79685/9611/1107/5931/54815/23186/57459/5928/5926/57504/3066/79718/9112/3065/10284
R-HSA-159234	Transport of Mature mRNAs Derived from Intronless Transcripts	38	-0.591554	-2.17015	0.00140252	0.0166311	0.0111466	3779	tags=68%, list=26%, signal=50%	4927/6396/7175/53981/1977/348995/4928/9688/4686/7884/23165/5903/9972/22916/23636/10482/55339/57122/10762/81608/81929/23511/129401/8021/23279/53371
R-HSA-159230	Transport of the SLBP Dependant Mature mRNA	31	-0.619549	-2.17253	0.00142248	0.0166311	0.0111466	3779	tags=74%, list=26%, signal=55%	4927/6396/7175/1977/348995/4928/9688/4686/7884/23165/5903/9972/22916/23636/10482/57122/10762/81929/23511/129401/8021/23279/53371
R-HSA-159236	Transport of Mature mRNA derived from an Intron-Containing Transcript	55	-0.560868	-2.21296	0.00132275	0.0166311	0.0111466	4655	tags=69%, list=33%, signal=47%	8086/65109/79023/55110/7307/4927/6396/7175/84321/80145/348995/4928/9688/4686/84271/23165/9877/57187/5903/9972/84248/22916/23636/10482/4116/51362/10250/9785/57122/11338/10569/10762/81929/23511/129401/8021/23279/53371
R-HSA-5617833	Cilium Assembly	181	-0.472865	-2.21758	0.0011236	0.0166311	0.0111466	4529	tags=59%, list=32%, signal=41%	6608/51668/81027/146057/378/10142/57728/2847/129880/55212/55722/4751/56912/123016/55763/983/8481/26146/23354/3842/54820/79989/5147/51626/10376/192668/7531/150737/51259/3797/91147/9657/93323/583/79598/11127/6950/585/23332/5311/117177/9662/9742/10576/261734/166379/5577/5048/203068/79659/27031/6753/22919/55755/582/80321/5566/121441/10640/79441/56623/54806/84747/4957/115106/28981/22995/80184/55081/51…
R-HSA-72202	Transport of Mature Transcript to Cytoplasm	64	-0.546508	-2.22398	0.00129534	0.0166311	0.0111466	4655	tags=67%, list=33%, signal=46%	8086/65109/79023/55110/7307/4927/6396/7175/53981/84321/80145/1977/348995/4928/9688/4686/7884/84271/23165/9877/57187/5903/9972/84248/22916/23636/10482/4116/51362/10250/9785/55339/57122/11338/10569/10762/81608/81929/23511/129401/8021/23279/53371
R-HSA-2500257	Resolution of Sister Chromatid Cohesion	111	-0.503222	-2.22713	0.00118906	0.0166311	0.0111466	4660	tags=63%, list=33%, signal=43%	9133/79023/11004/5526/10403/5516/891/983/11130/54820/55839/81565/1783/10376/80152/6396/2491/25909/51143/23332/83540/54821/9183/3796/348995/4928/91687/25936/55143/699/55920/5048/5529/9735/1063/4085/5525/22919/348235/5903/1062/701/5519/5501/3619/64105/10274/5515/1781/55055/7514/23244/8243/57122/9184/347688/23421/9793/81929/9126/81930/23122/5885/5528/23279/79003/10735/5527/23047/55166
R-HSA-212165	Epigenetic regulation of gene expression	87	-0.525521	-2.23097	0.00124069	0.0166311	0.0111466	5107	tags=72%, list=36%, signal=47%	5440/1788/10849/25885/9015/26147/9188/2965/60/9219/2966/84172/54790/10919/2968/79101/2932/51742/9013/7343/29128/64426/1108/30834/11176/2071/79685/121536/200424/8467/8726/11335/2033/1107/5931/1786/902/23411/54815/6996/23512/9031/6908/57459/8932/1789/5928/221830/57504/3066/23451/25942/7913/9112/3065/80312/9014/79595/3720/7270/22823/8850/10284
R-HSA-69278	Cell Cycle, Mitotic	437	-0.440563	-2.23176	0.00103199	0.0166311	0.0111466	4697	tags=54%, list=33%, signal=38%	2305/64151/55388/9133/8086/140609/9978/79023/5716/11004/5526/22974/55722/4751/7029/7157/10403/5516/7321/891/983/5578/8481/8697/11130/1871/5427/5682/10213/4175/1460/1763/23354/5579/54107/54820/55839/890/8548/1870/81565/114791/1783/10376/80152/157570/9700/7531/7465/23133/4927/6396/1032/2491/1031/5706/7175/25909/5426/91750/93323/2932/9837/208/51143/23332/119504/8615/8317/143471/83540/9662/64682/5933…
R-HSA-3899300	SUMOylation of transcription cofactors	43	-0.59102	-2.23704	0.00136986	0.0166311	0.0111466	4500	tags=72%, list=31%, signal=50%	8554/57332/1912/84733/8204/1616/1655/6045/8535/80012/1487/6294/6015/648/7329/7341/2033/10210/1387/4869/6613/4152/10521/9994/22955/115426/8648/25942/7690/59348/1911
R-HSA-68886	M Phase	302	-0.453573	-2.24178	0.00106383	0.0166311	0.0111466	4682	tags=56%, list=33%, signal=38%	64151/9133/8086/140609/79023/5716/11004/5526/55722/4751/10403/5516/7321/891/983/5578/8481/8697/11130/5682/10213/1460/23354/5579/54820/55839/8548/81565/114791/1783/10376/80152/9700/7531/23133/4927/6396/2491/5706/7175/25909/93323/51143/23332/119504/8615/143471/83540/9662/64682/54821/9183/3796/9663/348995/4928/9688/23397/91687/25936/55143/699/5577/55920/5048/5529/996/203068/9735/26003/1063/7314/7964…
R-HSA-8854518	AURKA Activation by TPX2	66	-0.547933	-2.24474	0.001287	0.0166311	0.0111466	4509	tags=62%, list=32%, signal=43%	22974/55722/4751/983/8481/23354/54820/7531/93323/23332/9662/5577/3161/5048/203068/22919/55755/80321/5566/121441/79441/4957/115106/22995/80184/5116/10733/84131/55125/5108/1781/55142/9793/55835/79959/80254/54801/22981/7840/9702/11116
R-HSA-380270	Recruitment of mitotic centrosome proteins and complexes	72	-0.547372	-2.2489	0.00129702	0.0166311	0.0111466	4476	tags=61%, list=31%, signal=42%	55722/4751/983/8481/23354/54820/114791/7531/93323/23332/9662/5577/5048/203068/22919/55755/80321/728642/5566/984/121441/85378/79441/4957/115106/22995/80184/5116/10733/84131/55125/5108/1781/55142/9793/55835/79959/10426/80254/54801/22981/7840/9702/11116
R-HSA-380287	Centrosome maturation	72	-0.547372	-2.2489	0.00129702	0.0166311	0.0111466	4476	tags=61%, list=31%, signal=42%	55722/4751/983/8481/23354/54820/114791/7531/93323/23332/9662/5577/5048/203068/22919/55755/80321/728642/5566/984/121441/85378/79441/4957/115106/22995/80184/5116/10733/84131/55125/5108/1781/55142/9793/55835/79959/10426/80254/54801/22981/7840/9702/11116
R-HSA-380259	Loss of Nlp from mitotic centrosomes	63	-0.554829	-2.24908	0.00130039	0.0166311	0.0111466	4476	tags=62%, list=31%, signal=43%	55722/4751/983/8481/23354/54820/7531/93323/23332/9662/5577/5048/203068/22919/55755/80321/5566/121441/79441/4957/115106/22995/80184/5116/10733/84131/55125/5108/1781/55142/9793/55835/79959/80254/54801/22981/7840/9702/11116
R-HSA-380284	Loss of proteins required for interphase microtubule organization from the centrosome	63	-0.554829	-2.24908	0.00130039	0.0166311	0.0111466	4476	tags=62%, list=31%, signal=43%	55722/4751/983/8481/23354/54820/7531/93323/23332/9662/5577/5048/203068/22919/55755/80321/5566/121441/79441/4957/115106/22995/80184/5116/10733/84131/55125/5108/1781/55142/9793/55835/79959/80254/54801/22981/7840/9702/11116
R-HSA-4570464	SUMOylation of RNA binding proteins	43	-0.600633	-2.27343	0.00136986	0.0166311	0.0111466	4655	tags=81%, list=33%, signal=55%	8086/79023/57332/1912/84733/4927/6396/7175/6045/8535/348995/4928/9688/80012/23165/6015/648/5903/7329/7341/9972/23636/6613/57122/3183/10762/81929/23511/22955/129401/8021/23279/53371/3190/1911
R-HSA-68884	Mitotic Telophase/Cytokinesis	11	-0.848457	-2.27667	0.0015456	0.0166311	0.0111466	1763	tags=91%, list=12%, signal=80%	9493/10112/10274/23244/8243/9126/5885/25836/10735/23047
R-HSA-5620912	Anchoring of the basal body to the plasma membrane	87	-0.537316	-2.28104	0.00124069	0.0166311	0.0111466	4476	tags=59%, list=31%, signal=41%	55722/4751/983/8481/23354/54820/7531/51259/91147/9657/93323/79598/23332/117177/9662/261734/5577/5048/203068/22919/55755/80321/5566/121441/79441/54806/4957/115106/22995/80184/5116/10733/84131/55125/5108/1781/23322/57787/55142/9793/26005/132320/55835/347240/79959/80254/54801/22981/7840/9702/11116
R-HSA-3108214	SUMOylation of DNA damage response and repair proteins	72	-0.556631	-2.28695	0.00129702	0.0166311	0.0111466	4655	tags=74%, list=33%, signal=50%	8086/79023/8554/57332/54780/1912/84733/8924/4927/6396/5893/7175/6045/641/8535/7508/348995/4928/9688/7486/23137/80012/23165/79677/6015/648/5903/7329/7341/9972/23636/10274/6613/493861/6117/6996/8243/57122/51564/7518/10762/81929/23511/9126/22955/9656/5885/129401/8021/23279/53371/10735/1911
R-HSA-8939243	RUNX1 interacts with co-factors whose precise effect on RUNX1 targets is not known	36	-0.638938	-2.30773	0.00140845	0.0166311	0.0111466	4320	tags=86%, list=30%, signal=60%	6595/6597/57332/1460/1912/84733/57492/6601/26053/6045/8535/80012/6015/648/8289/2033/861/6598/86/6599/22955/10138/1459/6602/84333/196528/865/6605/55193/23429/1911
R-HSA-141424	Amplification of signal from the kinetochores	86	-0.545837	-2.30992	0.00124844	0.0166311	0.0111466	4605	tags=67%, list=32%, signal=46%	79023/11004/5526/10403/5516/11130/54820/55839/81565/1783/80152/6396/2491/25909/51143/23332/83540/54821/9183/3796/348995/4928/91687/25936/55143/699/55920/5048/5529/9735/1063/4085/5525/22919/348235/5903/1062/701/5519/5501/3619/64105/5515/1781/55055/7514/57122/9184/23421/9793/81929/81930/23122/5528/23279/79003/5527/55166
R-HSA-141444	Amplification of signal from unattached kinetochores via a MAD2 inhibitory signal	86	-0.545837	-2.30992	0.00124844	0.0166311	0.0111466	4605	tags=67%, list=32%, signal=46%	79023/11004/5526/10403/5516/11130/54820/55839/81565/1783/80152/6396/2491/25909/51143/23332/83540/54821/9183/3796/348995/4928/91687/25936/55143/699/55920/5048/5529/9735/1063/4085/5525/22919/348235/5903/1062/701/5519/5501/3619/64105/5515/1781/55055/7514/57122/9184/23421/9793/81929/81930/23122/5528/23279/79003/5527/55166
R-HSA-69618	Mitotic Spindle Checkpoint	101	-0.535488	-2.32333	0.00121507	0.0166311	0.0111466	4605	tags=66%, list=32%, signal=45%	79023/11004/5526/10403/5516/7321/8697/11130/54820/55839/81565/1783/80152/6396/2491/25909/51143/23332/119504/83540/64682/54821/9183/3796/348995/4928/91687/25936/55143/699/55920/5048/5529/996/9735/1063/4085/5525/22919/348235/5903/1062/701/5519/5501/7324/3619/29945/64105/5515/1781/55055/7514/57122/9184/23421/9793/81929/10393/81930/23122/5528/23279/8881/79003/5527/55166
R-HSA-4551638	SUMOylation of chromatin organization proteins	53	-0.594362	-2.34416	0.00130548	0.0166311	0.0111466	4655	tags=77%, list=33%, signal=52%	8086/79023/8554/57332/1912/84733/9759/4927/6396/7175/6045/8535/348995/4928/9688/80012/23165/6015/648/5903/7329/7341/9972/23636/1107/6613/23512/57122/10762/81929/23511/3066/22955/129401/8021/23279/53371/3065/1911/23468/6304
R-HSA-3108232	SUMO E3 ligases SUMOylate target proteins	159	-0.507601	-2.34538	0.00114943	0.0166311	0.0111466	4188	tags=60%, list=29%, signal=43%	7067/54780/2099/1912/84733/8924/9759/8204/5465/4927/6396/2516/1616/1655/3090/5893/7175/7158/6045/641/8535/7508/5111/348995/4928/9688/55143/4193/7486/23137/80012/1487/23165/6294/79677/5987/6015/7428/648/7153/5903/7329/7341/9972/7150/2908/3619/2033/23636/1107/10210/1387/10274/4869/6613/1786/4152/493861/6117/6996/23512/8243/57122/1789/51564/7518/3183/10521/10762/6670/81929/23511/9126/9994/3066/22955…
R-HSA-72172	mRNA Splicing	171	-0.506878	-2.3567	0.00114416	0.0166311	0.0111466	2494	tags=43%, list=17%, signal=36%	9879/5430/3188/6629/10523/3192/1665/3178/8449/1660/1478/53938/84991/5431/3191/3187/84844/10236/22916/55660/8175/23450/3185/1479/10283/22826/4116/51729/51362/10250/10181/55749/9785/23283/9716/55339/10594/11338/54883/154007/51503/3183/10569/81608/85313/51585/3181/988/5725/10285/5432/1994/10713/23398/23451/11017/10081/3184/11051/6434/27316/5093/11100/79869/25949/220988/5094/10949/3190/23020/57703/84…
R-HSA-72163	mRNA Splicing - Major Pathway	163	-0.510041	-2.35756	0.00115207	0.0166311	0.0111466	2593	tags=44%, list=18%, signal=37%	10914/9879/5430/3188/6629/10523/3192/1665/3178/8449/1660/1478/53938/84991/5431/3191/3187/84844/10236/22916/55660/8175/23450/3185/1479/10283/22826/4116/51729/51362/10250/10181/55749/9785/23283/9716/55339/10594/11338/54883/51503/3183/10569/81608/85313/51585/3181/988/5725/10285/5432/1994/10713/23398/23451/11017/3184/11051/6434/27316/5093/11100/79869/25949/220988/5094/10949/3190/23020/57703/84950/111…
R-HSA-2990846	SUMOylation	165	-0.514149	-2.38166	0.00114943	0.0166311	0.0111466	4188	tags=61%, list=29%, signal=44%	7067/54780/2099/1912/84733/8924/9759/59343/8204/5465/4927/6396/2516/1616/1655/3090/5893/7175/7158/6045/641/8535/7508/5111/348995/4928/9688/55143/4193/7486/23137/80012/1487/23165/6294/79677/5987/6015/7428/648/7153/5903/7329/7341/9972/7150/2908/3619/2033/23636/1107/10210/1387/10274/4869/6613/1786/4152/493861/6117/6996/23512/8243/205564/57122/1789/51564/7518/3183/10521/10762/6670/81929/23511/9126/99…
R-HSA-3247509	Chromatin modifying enzymes	170	-0.531998	-2.46907	0.00115075	0.0166311	0.0111466	4191	tags=61%, list=29%, signal=44%	84678/55729/10919/23326/57492/9643/5929/79813/23133/23030/5978/6601/27097/3054/55689/7403/51742/56950/9869/6871/6880/84159/64426/51147/10765/1386/1108/6907/23135/9682/8520/26009/79685/83852/57634/121536/9611/22992/117143/6883/51562/8089/27154/10933/10196/64324/8726/8289/23774/339287/56970/5927/9739/80314/23081/2033/10943/8242/10524/1107/1387/8464/6598/5931/10902/54815/51780/86/23512/54014/23186/5…
R-HSA-4839726	Chromatin organization	170	-0.531998	-2.46907	0.00115075	0.0166311	0.0111466	4191	tags=61%, list=29%, signal=44%	84678/55729/10919/23326/57492/9643/5929/79813/23133/23030/5978/6601/27097/3054/55689/7403/51742/56950/9869/6871/6880/84159/64426/51147/10765/1386/1108/6907/23135/9682/8520/26009/79685/83852/57634/121536/9611/22992/117143/6883/51562/8089/27154/10933/10196/64324/8726/8289/23774/339287/56970/5927/9739/80314/23081/2033/10943/8242/10524/1107/1387/8464/6598/5931/10902/54815/51780/86/23512/54014/23186/5…
R-HSA-68877	Mitotic Prometaphase	177	-0.526869	-2.47117	0.00111982	0.0166311	0.0111466	4682	tags=64%, list=33%, signal=43%	64151/9133/79023/11004/5526/55722/4751/10403/5516/891/983/8481/11130/1460/23354/54820/55839/81565/114791/1783/10376/80152/7531/6396/2491/25909/93323/51143/23332/83540/9662/54821/9183/3796/348995/4928/23397/91687/25936/55143/699/5577/55920/5048/5529/203068/9735/1063/4926/4085/5525/22919/55755/348235/80321/5566/5903/1062/121441/701/5519/5501/85378/79441/4957/115106/22995/80184/5116/3619/10733/84131…
R-HSA-3214847	HATs acetylate histones	62	-0.613327	-2.47248	0.00131062	0.0166311	0.0111466	3493	tags=66%, list=24%, signal=50%	27097/3054/55689/6871/6880/51147/1386/8520/26009/57634/117143/6883/51562/8089/27154/10933/23774/339287/56970/80314/2033/10943/10524/1387/8464/5931/10902/86/8295/8648/1810/9913/6314/26610/64769/84289/79595/54556/55167/8850/7862
R-HSA-72203	Processing of Capped Intron-Containing Pre-mRNA	215	-0.519325	-2.47857	0.00111359	0.0166311	0.0111466	3873	tags=55%, list=27%, signal=41%	55599/11325/4927/55696/6396/6638/1655/7536/7175/4904/10291/10978/53981/84321/85437/2521/80145/56339/1977/10992/348995/4928/9688/4686/7884/84271/10914/57721/9879/23165/5430/3188/6629/9877/10523/3192/1665/57187/3178/8449/5903/1660/1478/53938/84991/5431/3191/3187/9972/84248/84844/10236/22916/55660/8175/23636/23450/10482/3185/1479/10283/22826/4116/51729/51362/10250/10181/55749/9785/23283/9716/55339/1…
